# Supplementary material
Source: publisher figshare collection journal article supplement (https://acs.figshare.com/ndownloader/files/9809365)
Supplement: Supplementary file 1 [file 9809365]

# Supporting Information

## **Mn(OAc)<sub>3</sub>-Promoted Oxidative C<sub>sp3</sub>-P Bond Formation through C<sub>sp2</sub>-C<sub>sp2</sub> and P-H Bond Cleavage: Access to $\beta$ -Ketophosphonates.**

Pan Zhou, Biao Hu, Lingdan Li, Kairui Rao, Jiao Yang, and Fuchao Yu\*

*Faculty of Life Science and Technology, Kunming University of Science and Technology, Kunming, 650500, P. R. China.*

### Table of Contents

|                                                                       |           |
|-----------------------------------------------------------------------|-----------|
| <b>1. Control Experiments.....</b>                                    | <b>S2</b> |
| <b>2. NMR spectra (<sup>1</sup>H NMR and <sup>13</sup>C NMR).....</b> | <b>S4</b> |

## 1. Control Experiments.

### 1.1 Trapping and detecting the intermediate.

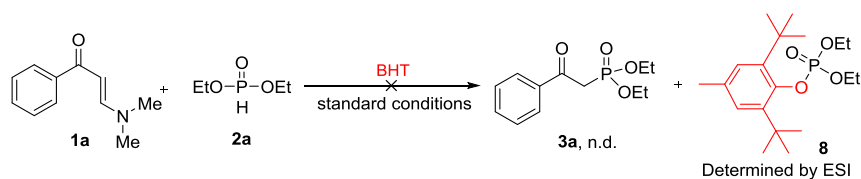

**Scheme S1** BHT-radical scavenging experiment.

*N,N*-Dimethylenaminone **1a** (0.1 mmol, 1.0 equiv), H-phosphonate **2a** (0.2 mmol, 2.0 equiv), butylated hydroxytoluene (BHT, 0.3 mmol, 3.0 equiv),  $\text{Mn}(\text{OAc})_3$  (0.3 mmol, 3.0 equiv), AcOH (0.2 ml) 1,4-dioxane (1 ml) were charged into a 15 ml ace glass pressure tub, and the mixture was stirred at 80 °C for 1.0 h. The mixture in situ HRMS study of the crude reaction mixture revealed the formation of adduct **8**.

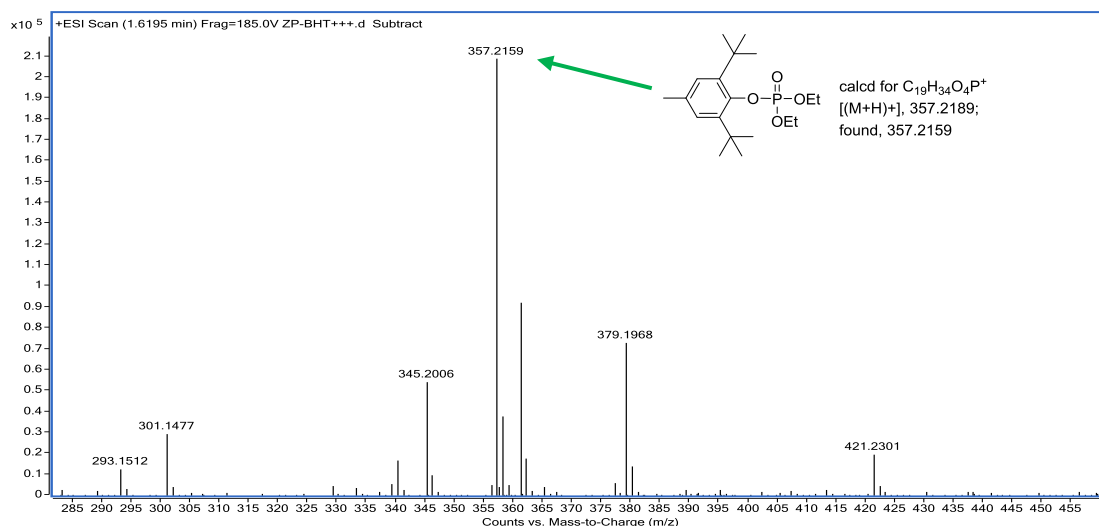

**Fig. S1** The BHT intermediate was detected by ESI.

### 1.2 Isotope-labeling studies

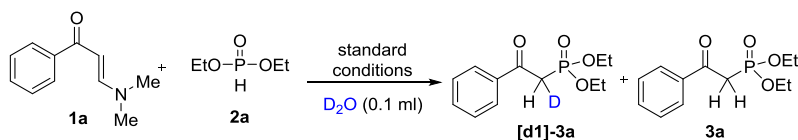

**Scheme S2** Deuterium exchange.

*N,N*-Dimethylenaminone **1a** (1 mmol, 1.0 equiv), H-phosphonate **2a** (2.0 mmol, 2.0 equiv),  $\text{Mn}(\text{OAc})_3$  (3 mmol, 3.0 equiv), AcOH (2 ml) 1,4-dioxane (4 ml) were charged into a 15 ml ace glass pressure tub, and the mixture was stirred at 80 °C for 12 h until *N,N*-dimethylenaminone **1a** were completely consumed. The mixture was cooled to room temperature, the reaction mixture was concentrated and purified by flash column chromatography to afford the  $\beta$ -ketophosphonate **3a** (51%), the desired product **[d<sub>1</sub>]-3a** was observed in  $^1\text{H}$ -NMR.

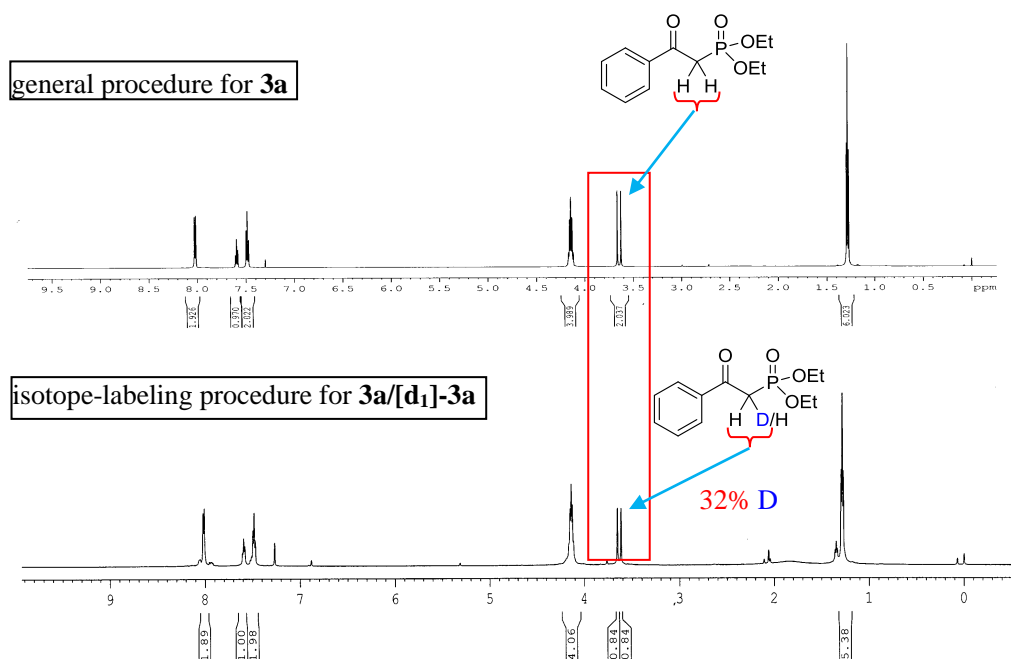

**Fig. S2** The deuterium-incorporated product **[d<sub>1</sub>]-3a** was determined by <sup>1</sup>H-NMR.

## 2. NMR spectra ( $^1\text{H}$ NMR and $^{13}\text{C}$ NMR)

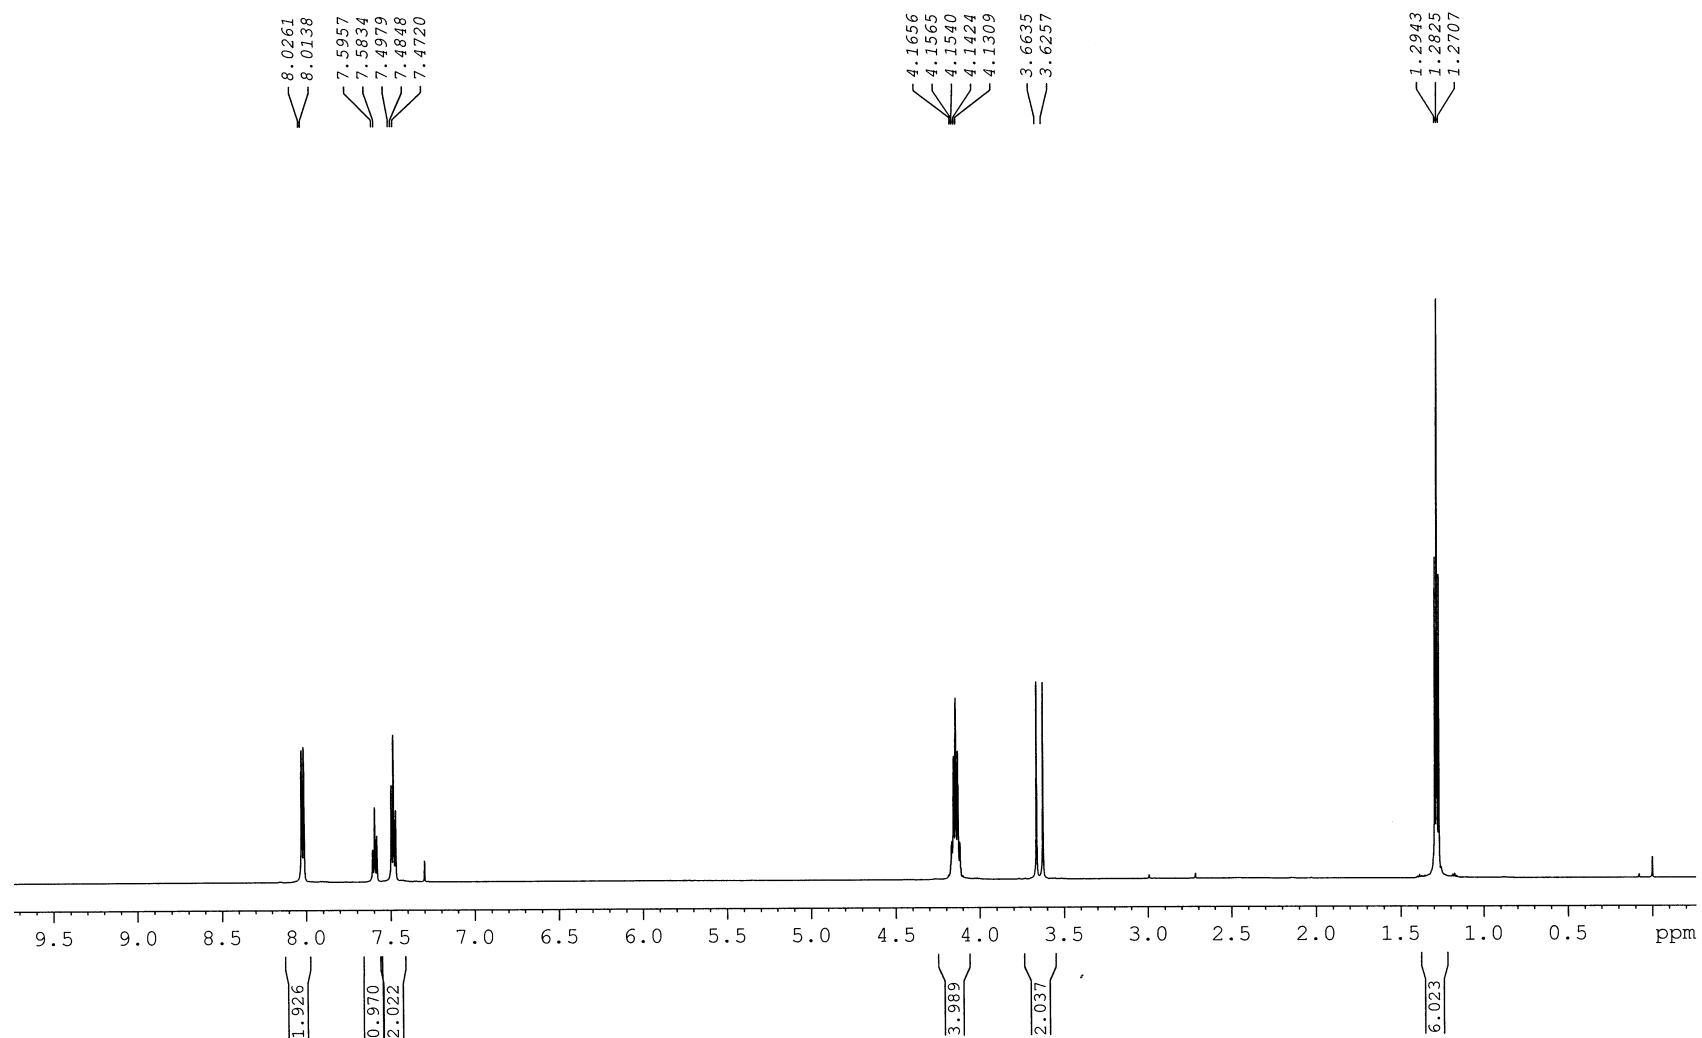

**Figure S3.**  $^1\text{H}$  NMR (600 MHz,  $\text{CDCl}_3$ ) spectra of compound **3a**

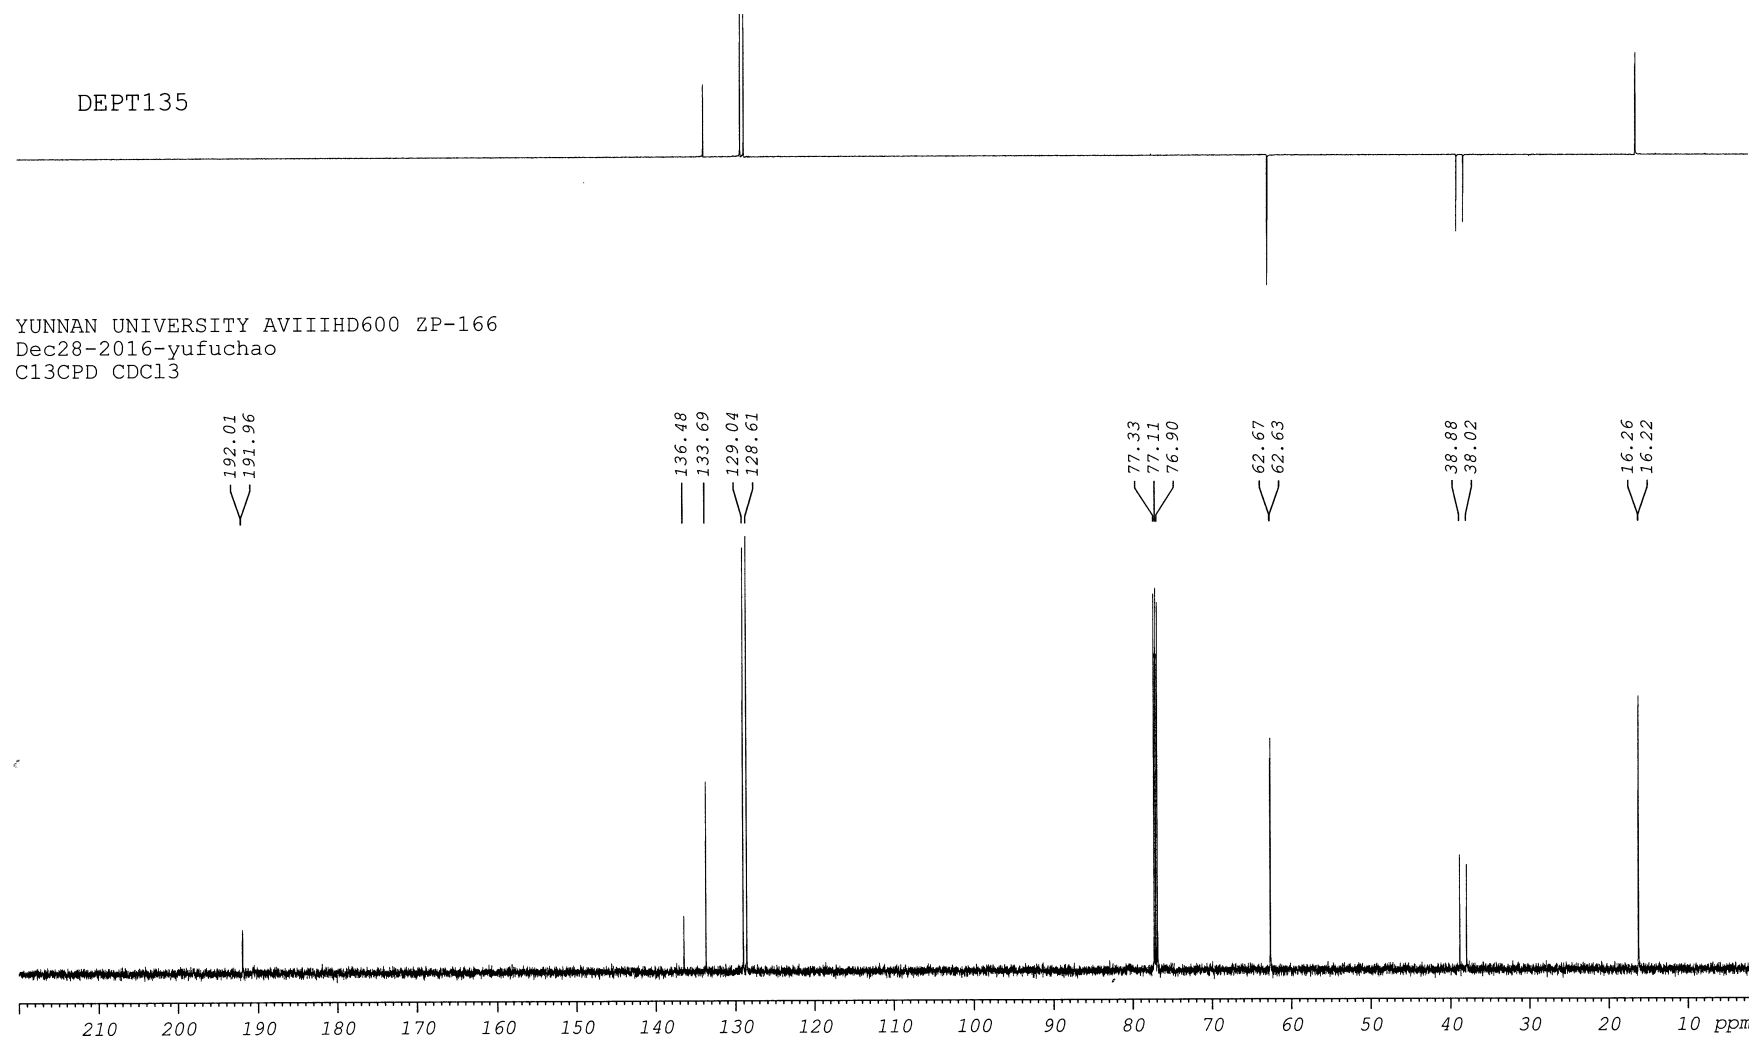

Figure S4.  $^{13}\text{C}$  NMR (150 MHz,  $\text{CDCl}_3$ ) spectra of compound **3a**

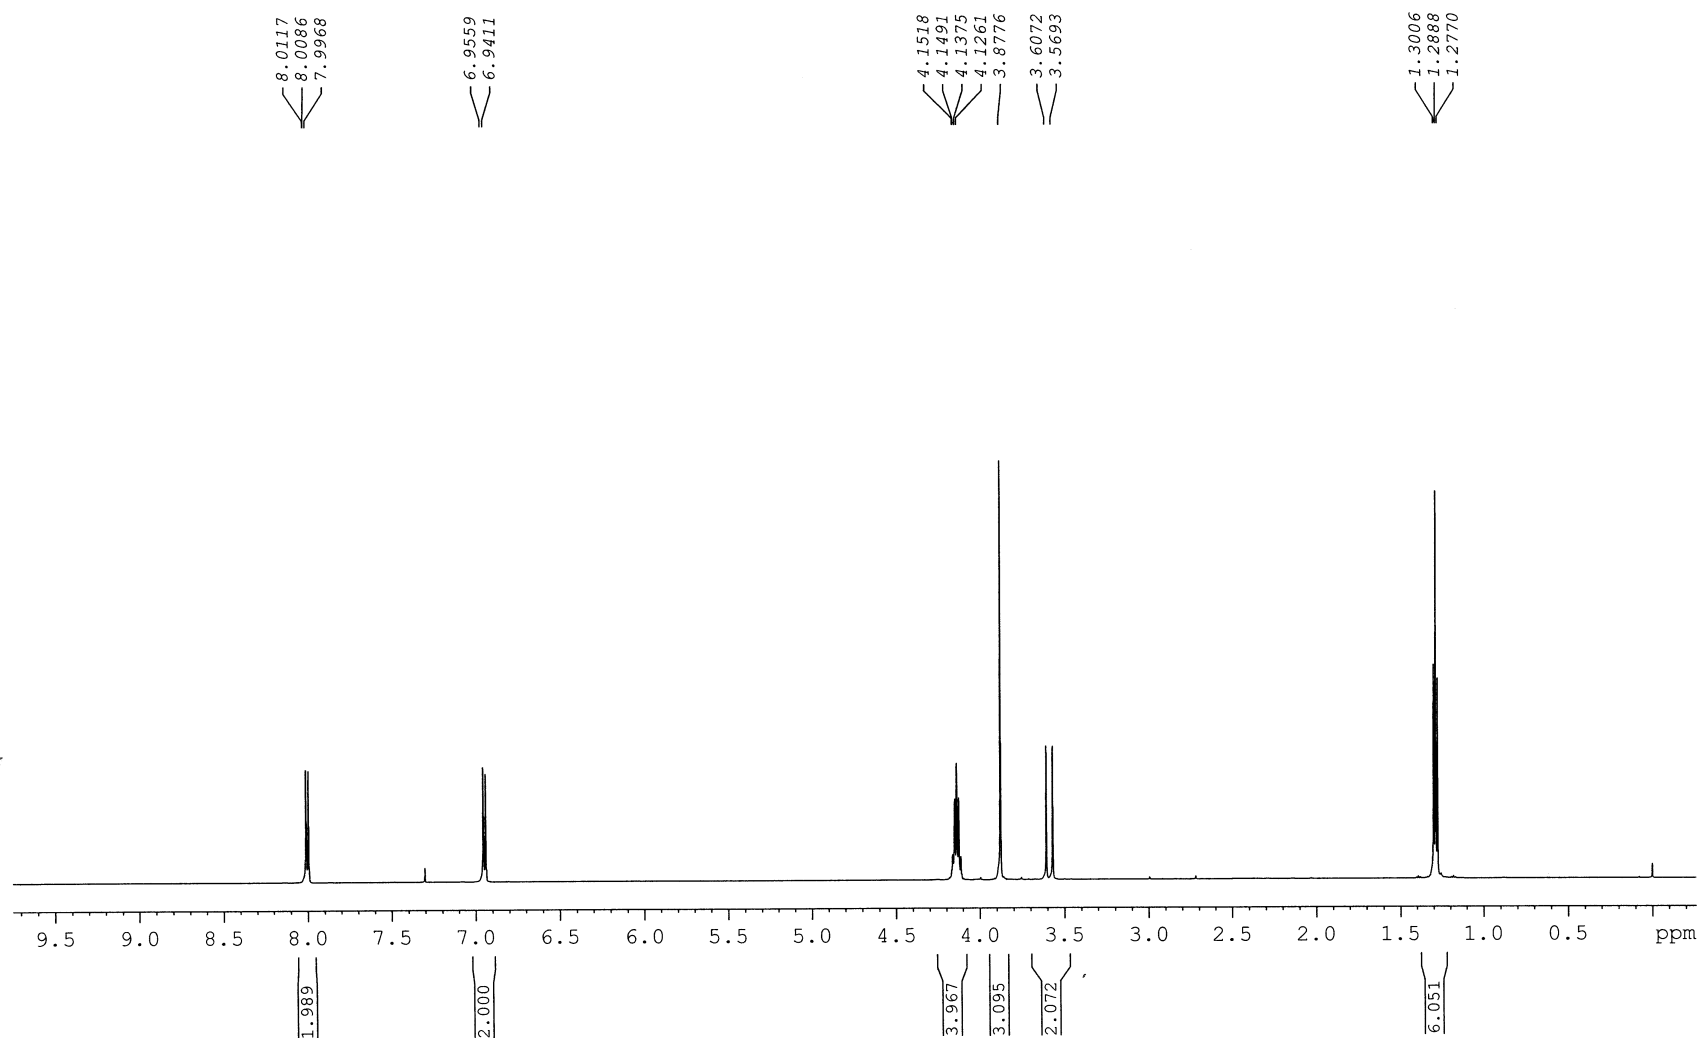

**Figure S5.** <sup>1</sup>H NMR (600 MHz, CDCl<sub>3</sub>) spectra of compound **3b**

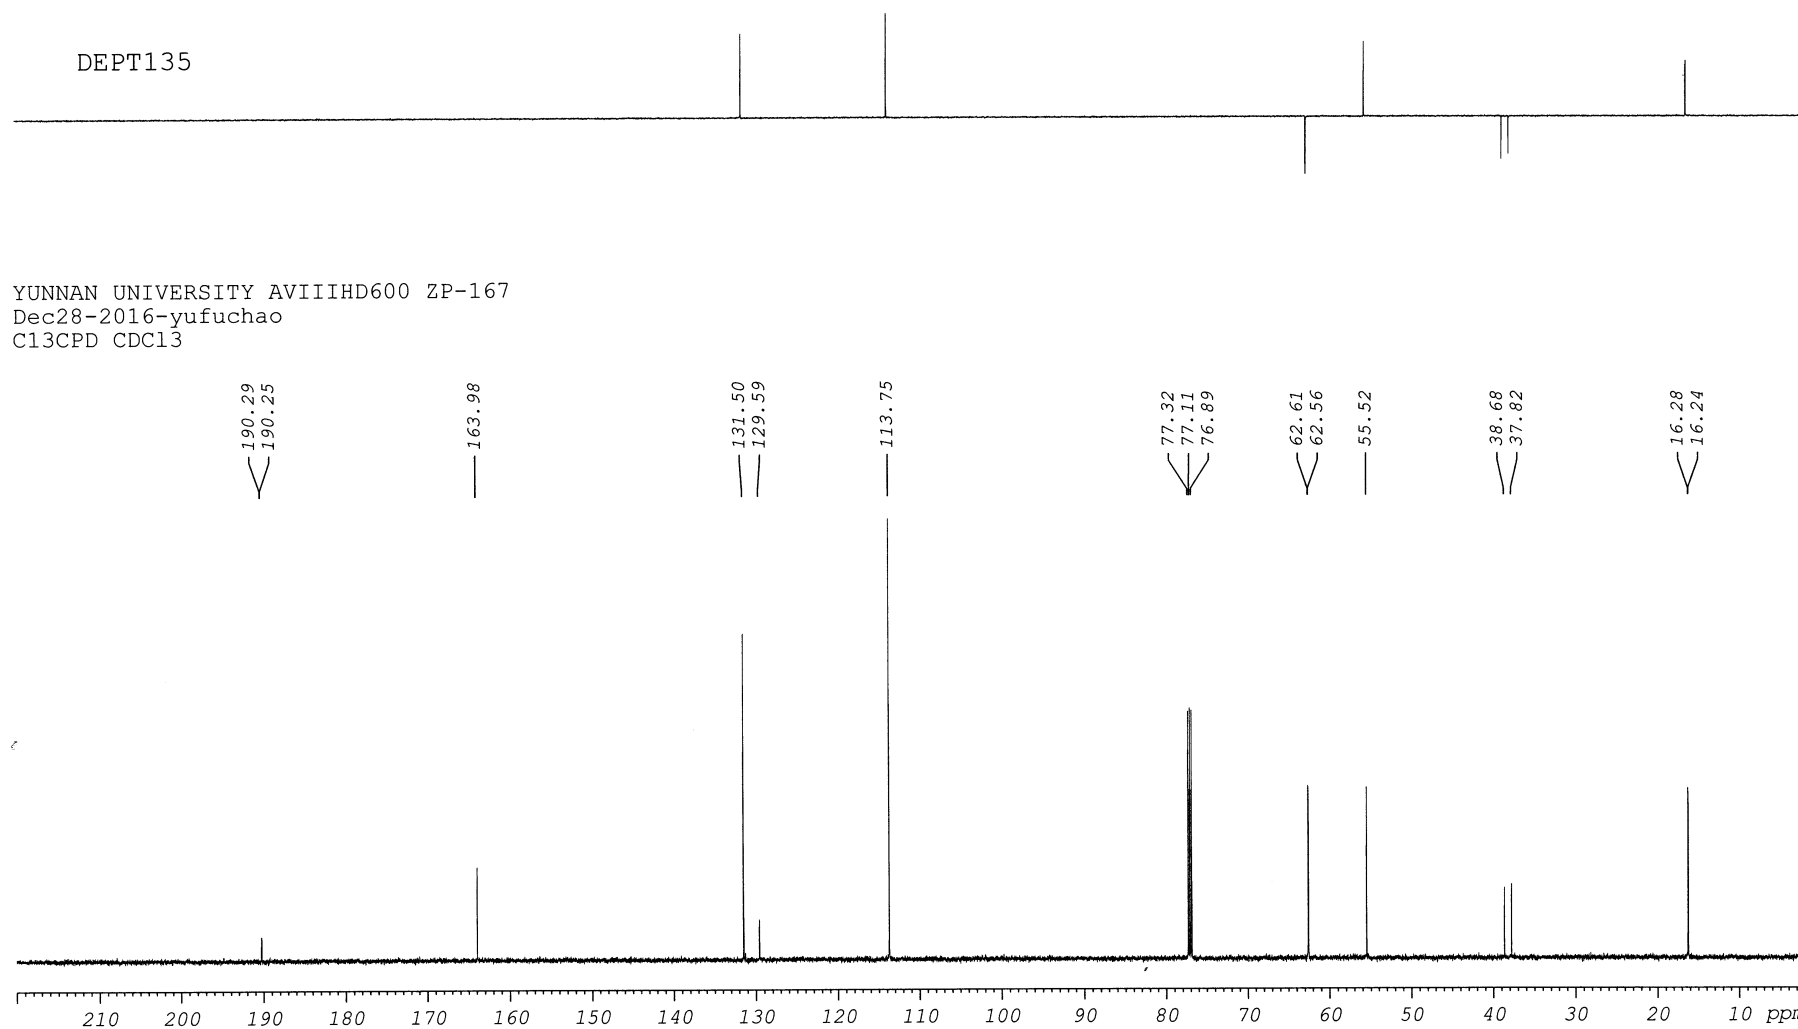

**Figure S6.**  $^{13}\text{C}$  NMR (150 MHz,  $\text{CDCl}_3$ ) spectra of compound **3b**



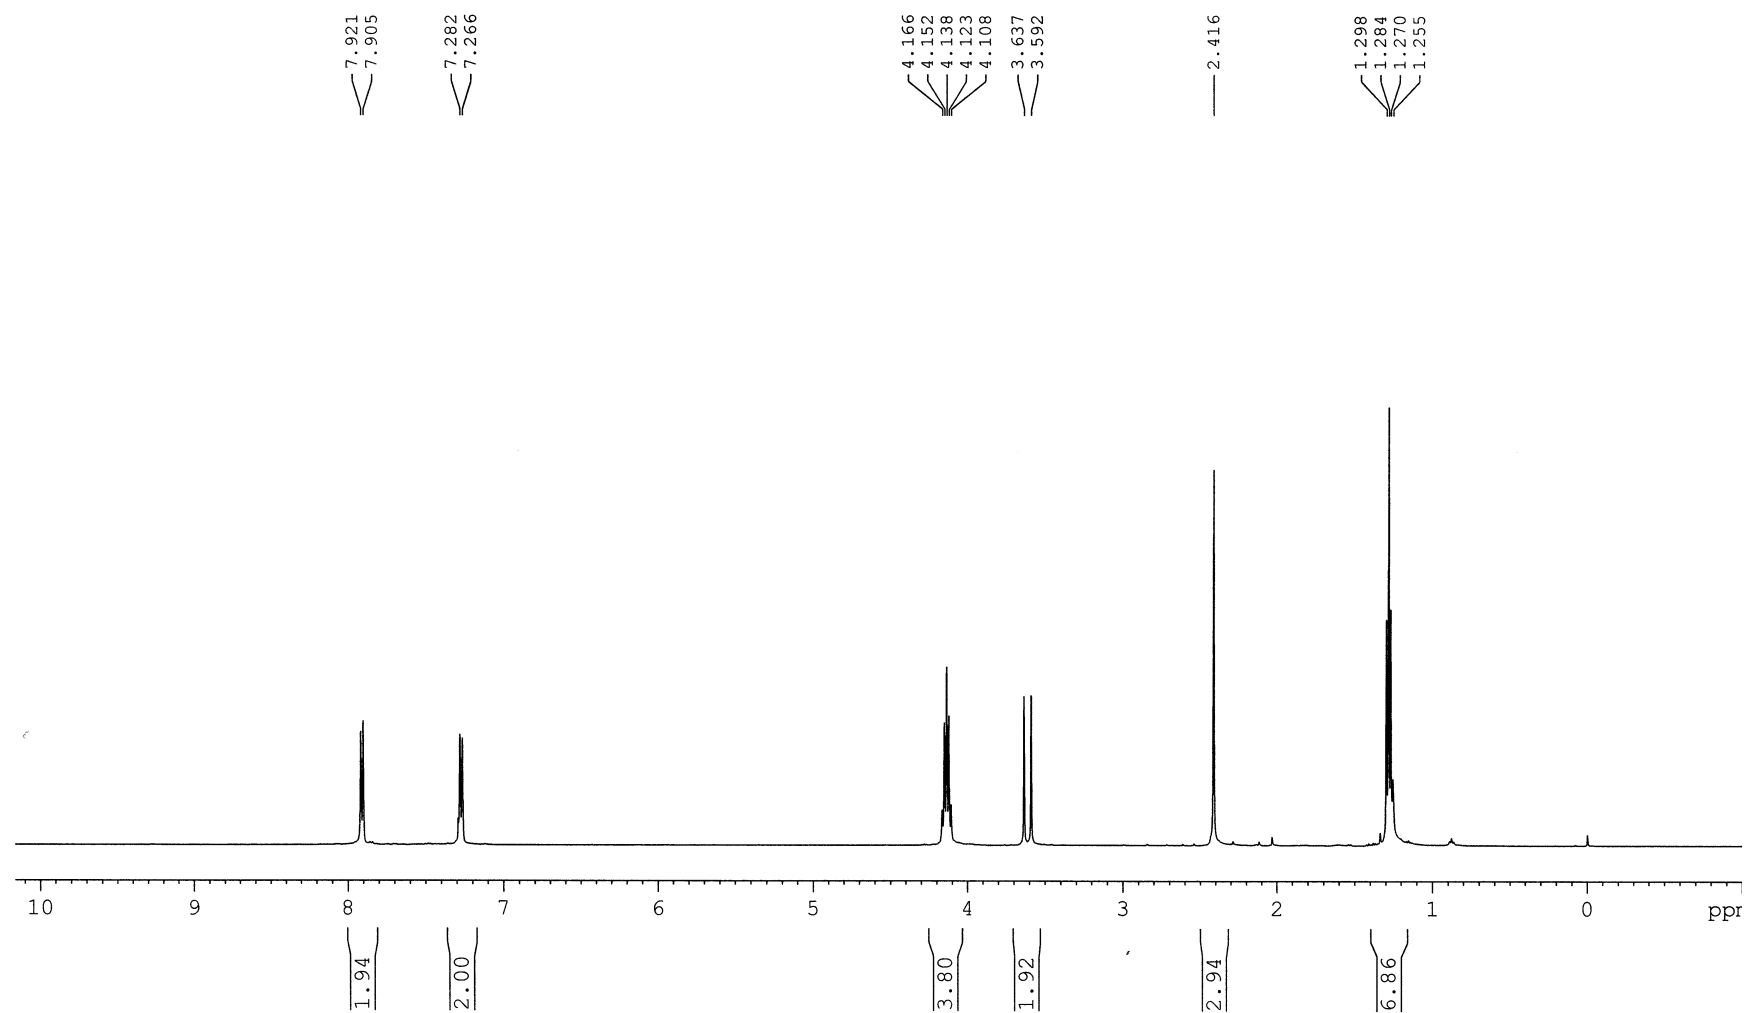

**Figure S7.** <sup>1</sup>H NMR (500 MHz, CDCl<sub>3</sub>) spectra of compound **3c**

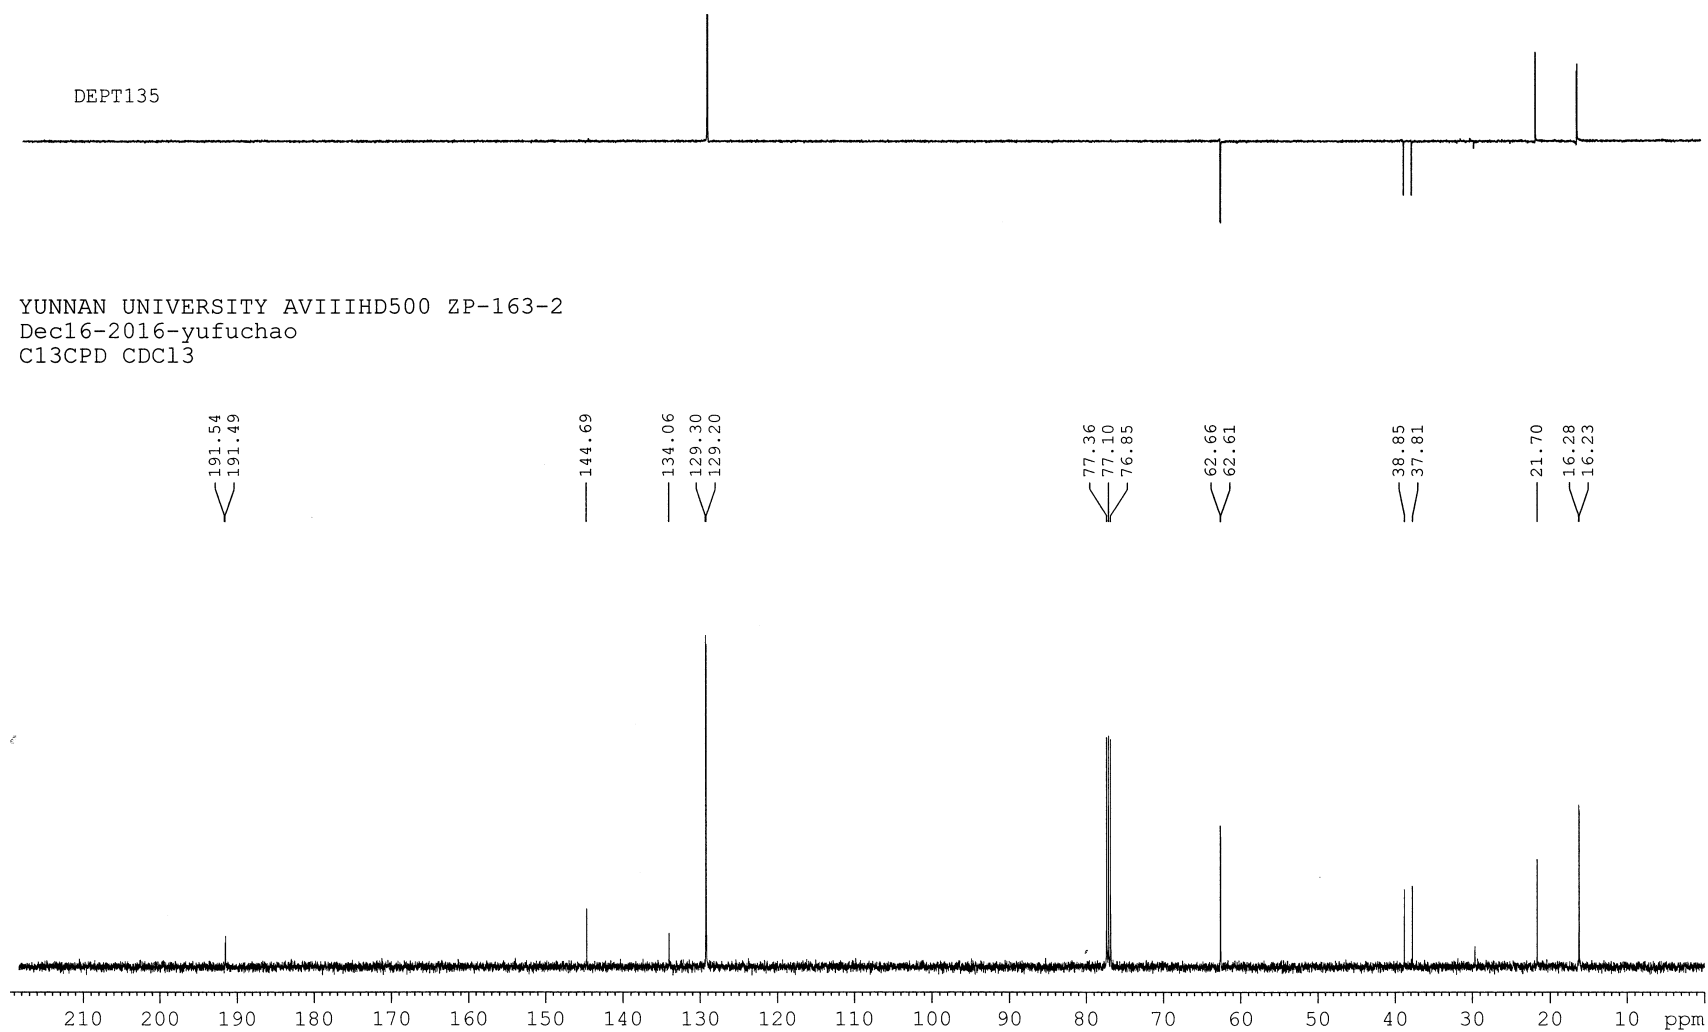

Figure S8.  $^{13}\text{C}$  NMR (125 MHz,  $\text{CDCl}_3$ ) spectra of compound **3c**

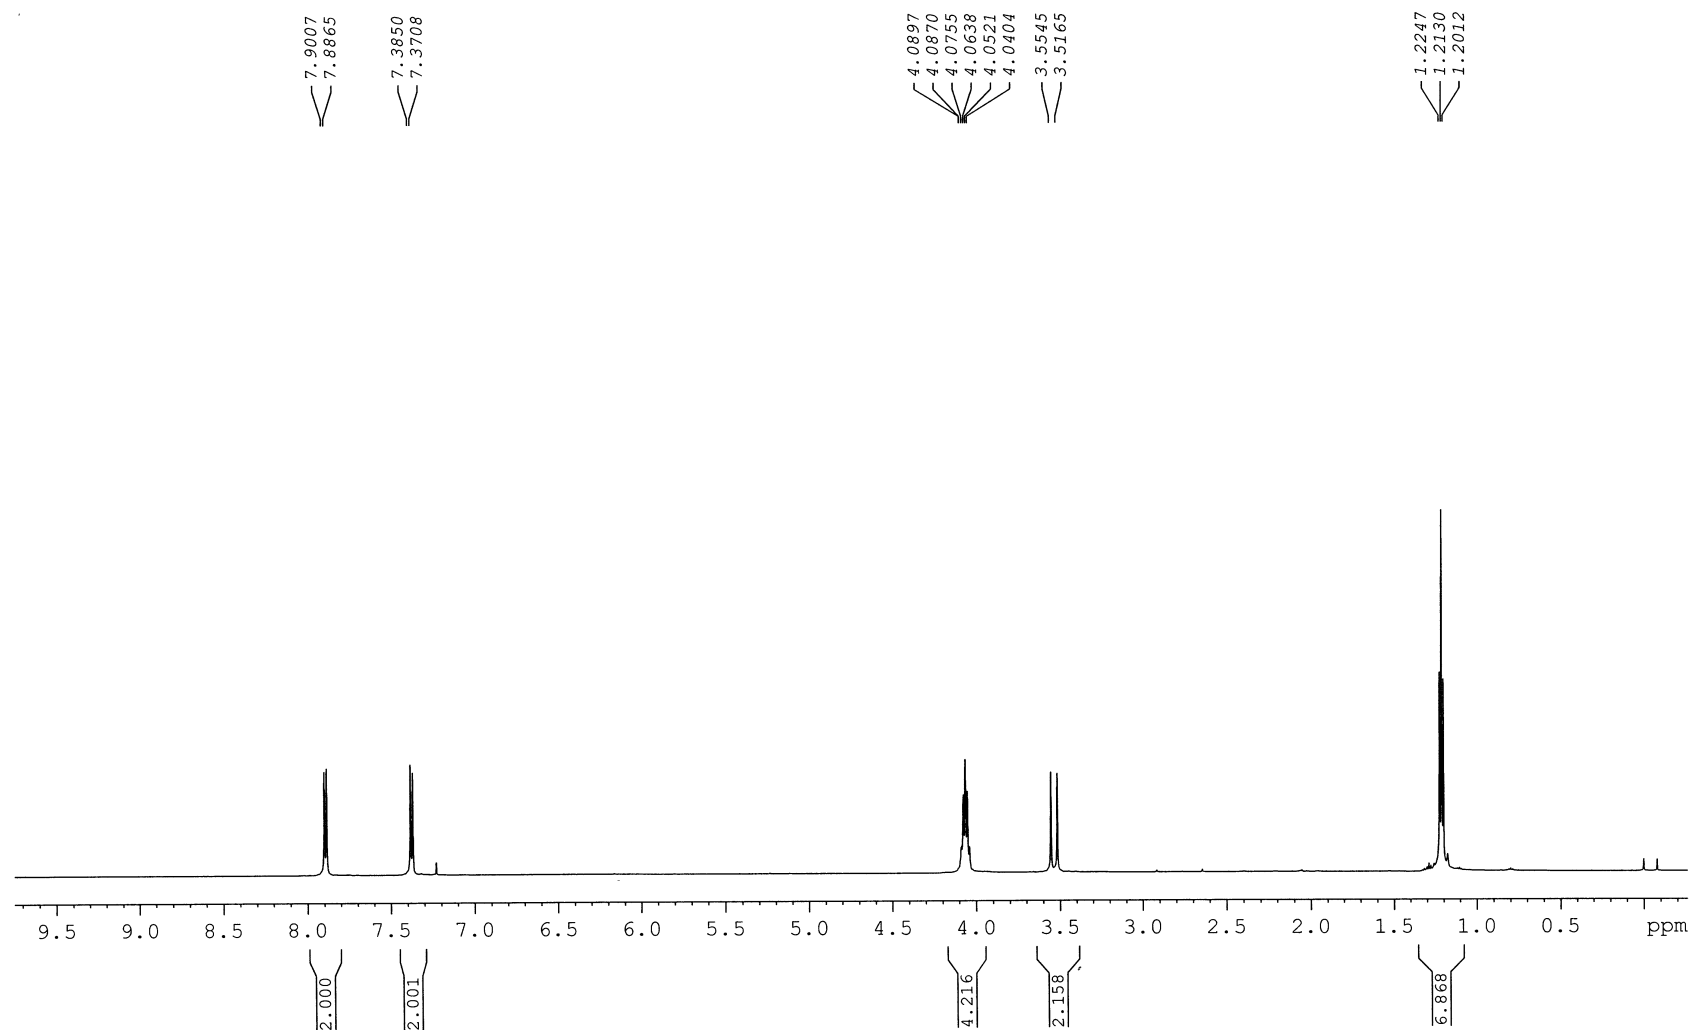

**Figure S9.** <sup>1</sup>H NMR (600 MHz, CDCl<sub>3</sub>) spectra of compound **3d**

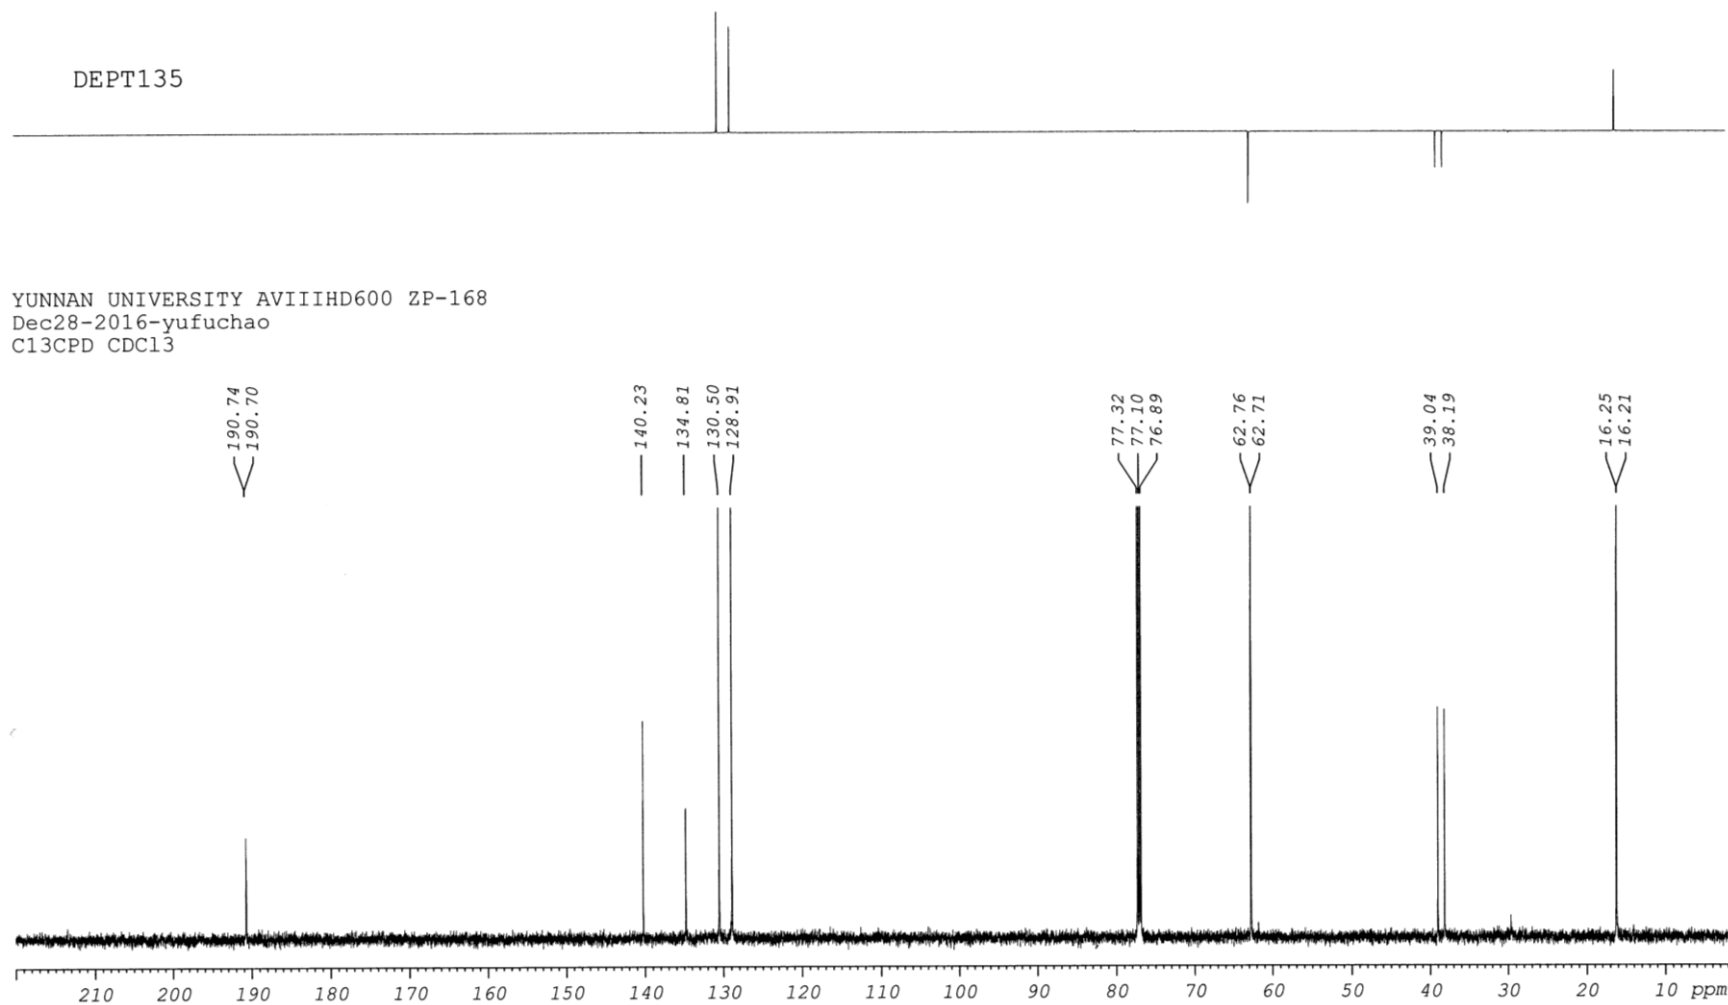

**Figure S10.** <sup>13</sup>C NMR (150 MHz, CDCl<sub>3</sub>) spectra of compound **3d**

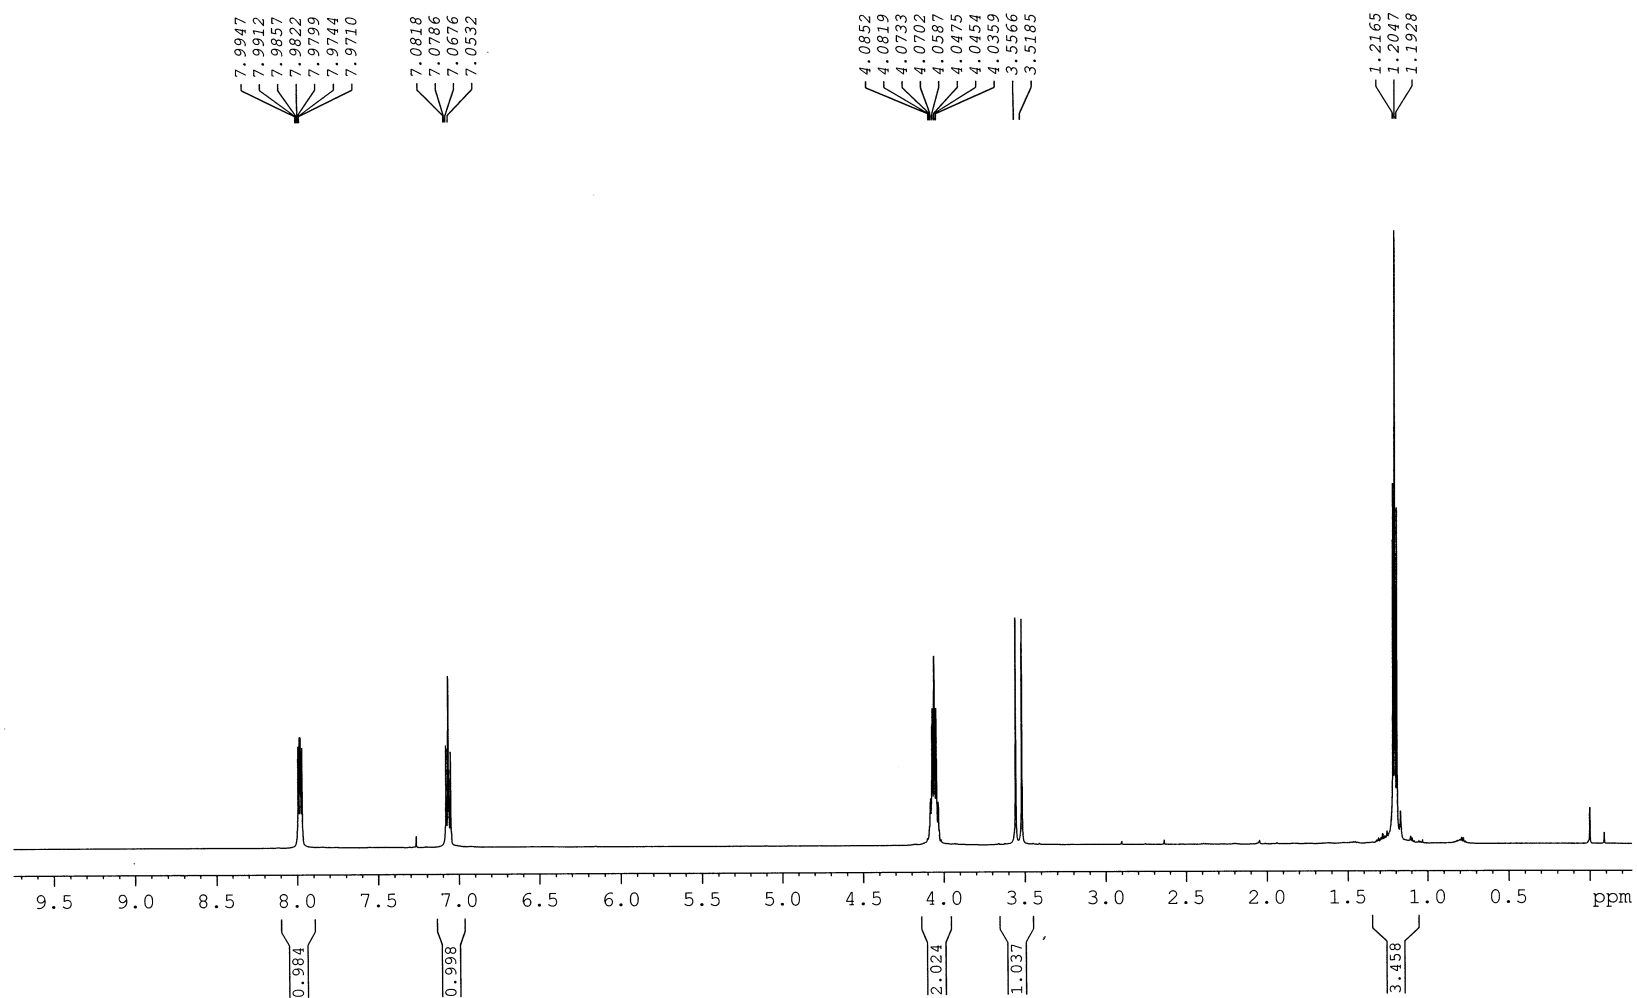

**Figure S11.** <sup>1</sup>H NMR (600 MHz, CDCl<sub>3</sub>) spectra of compound **3e**

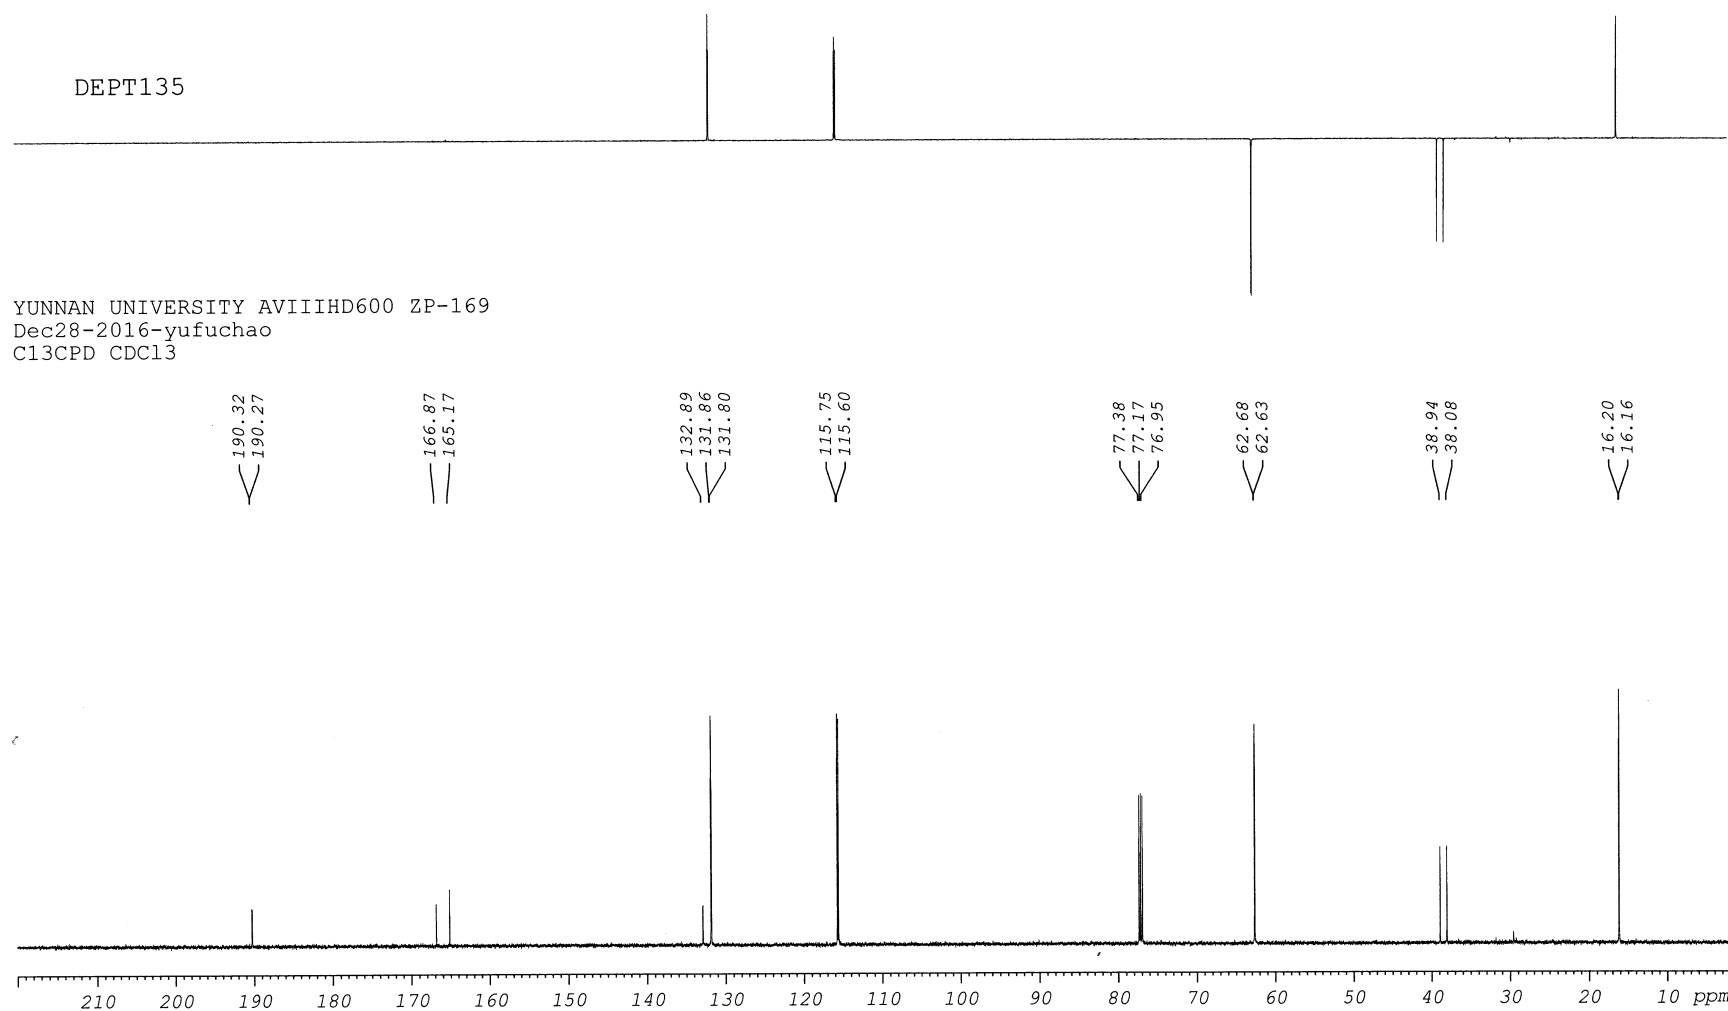

**Figure S12** <sup>13</sup>C NMR (150 MHz, CDCl<sub>3</sub>) spectra of compound **3e**

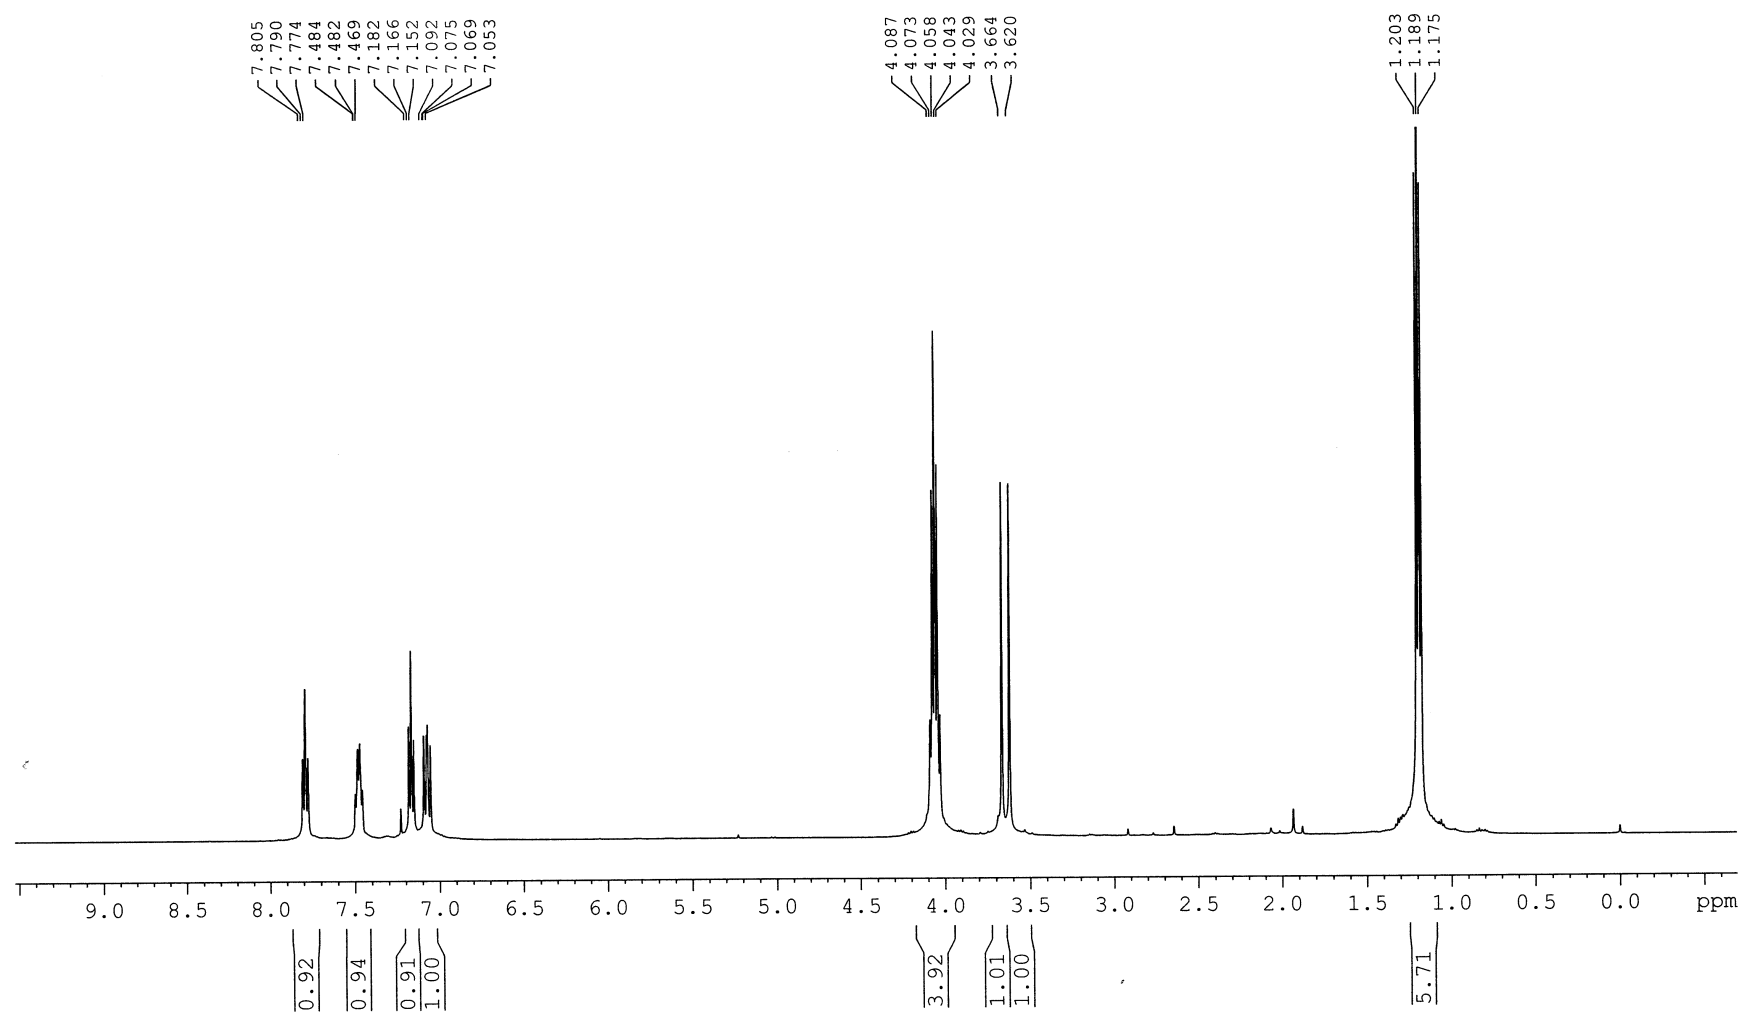

**Figure S13.**  $^1\text{H}$  NMR (500 MHz,  $\text{CDCl}_3$ ) spectra of compound **3f**

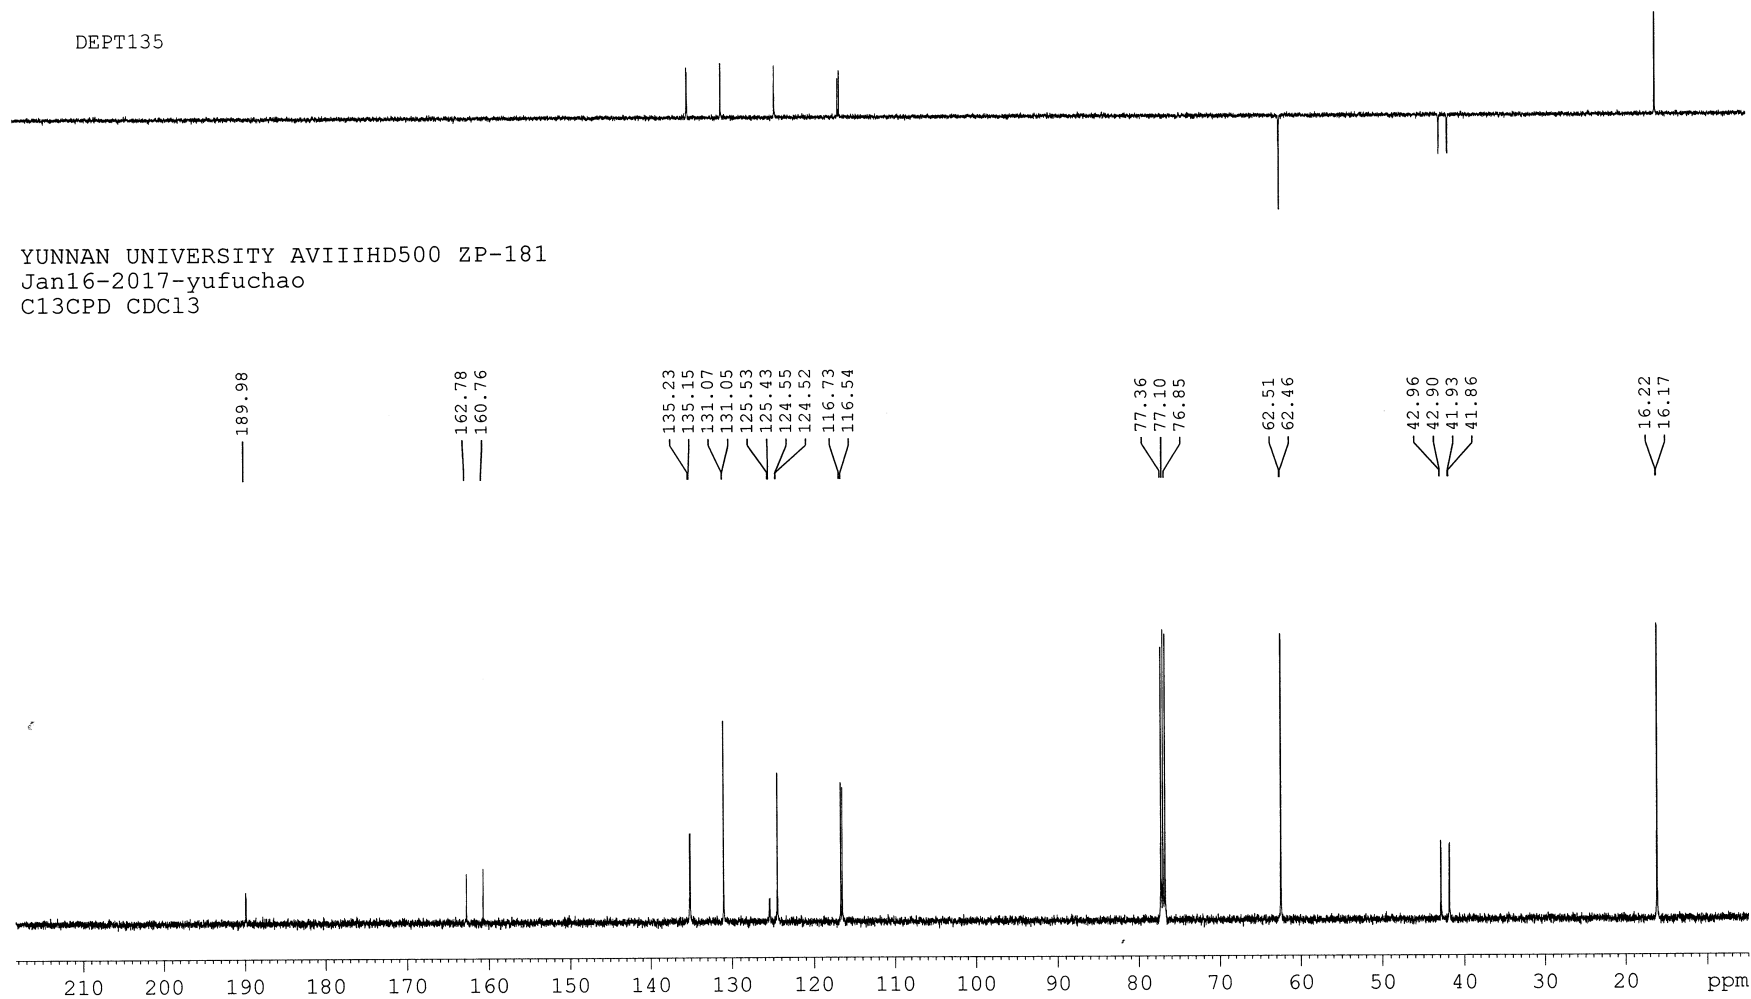

**Figure S14.**  $^{13}\text{C}$  NMR (125 MHz,  $\text{CDCl}_3$ ) spectra of compound **3f**



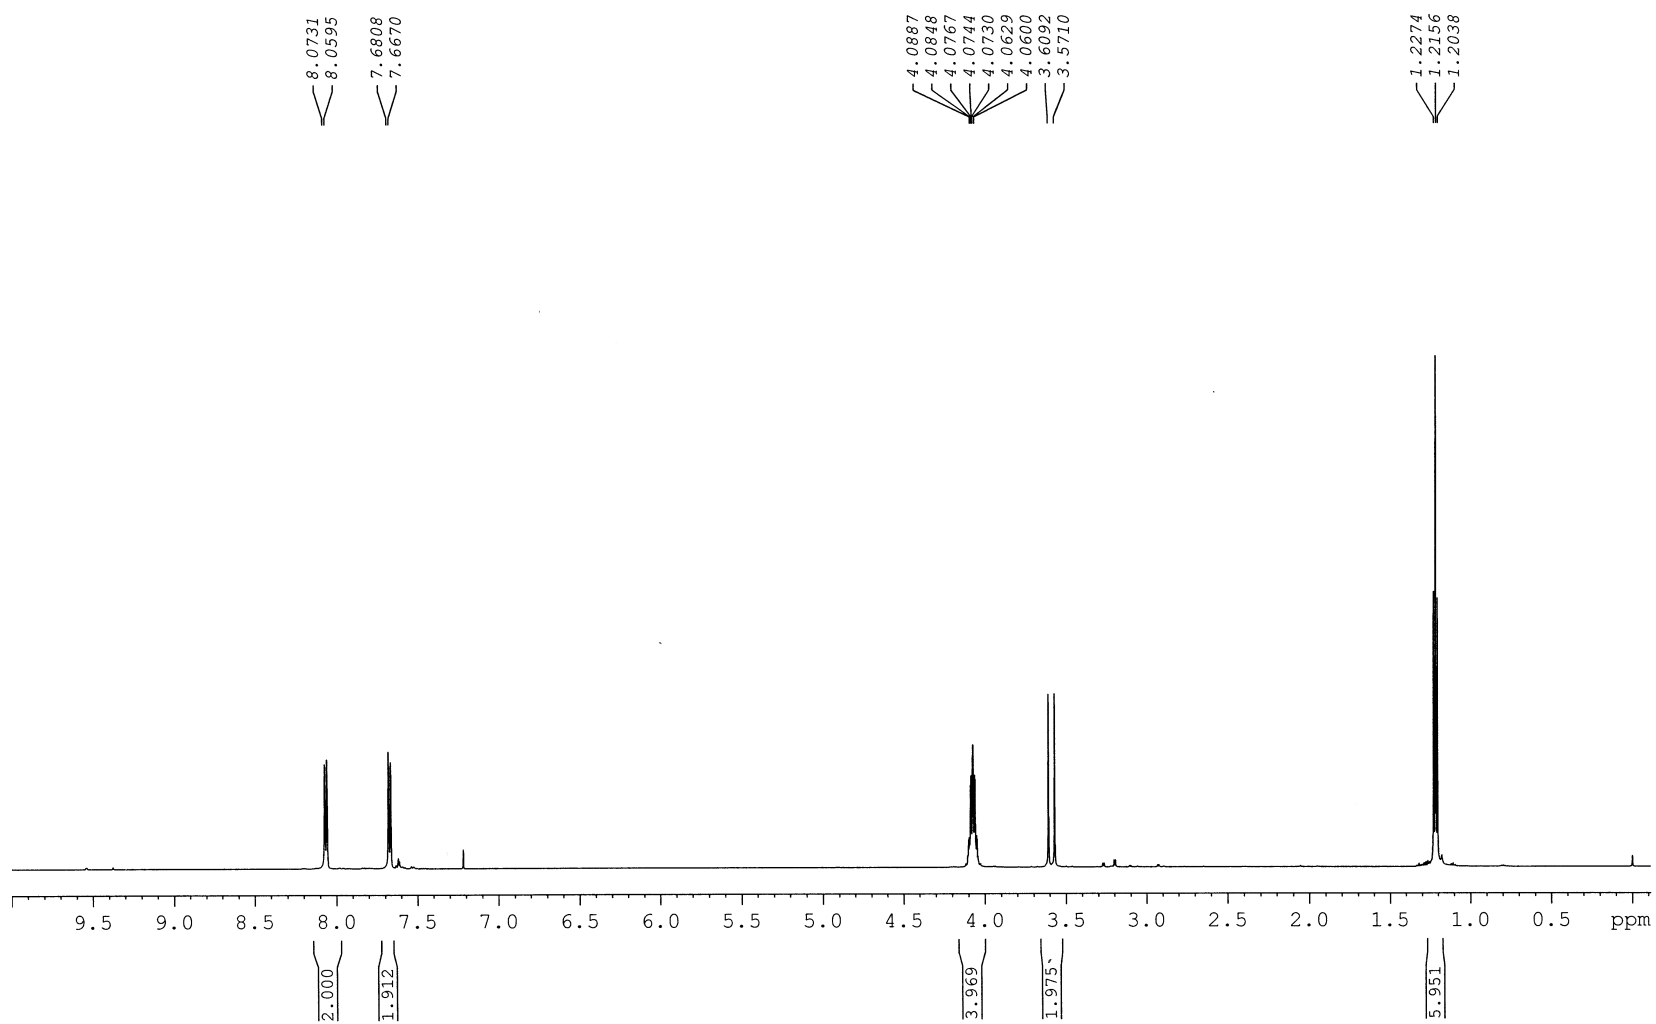

**Figure S15.**  $^1\text{H}$  NMR (600 MHz,  $\text{CDCl}_3$ ) spectra of compound **3g**

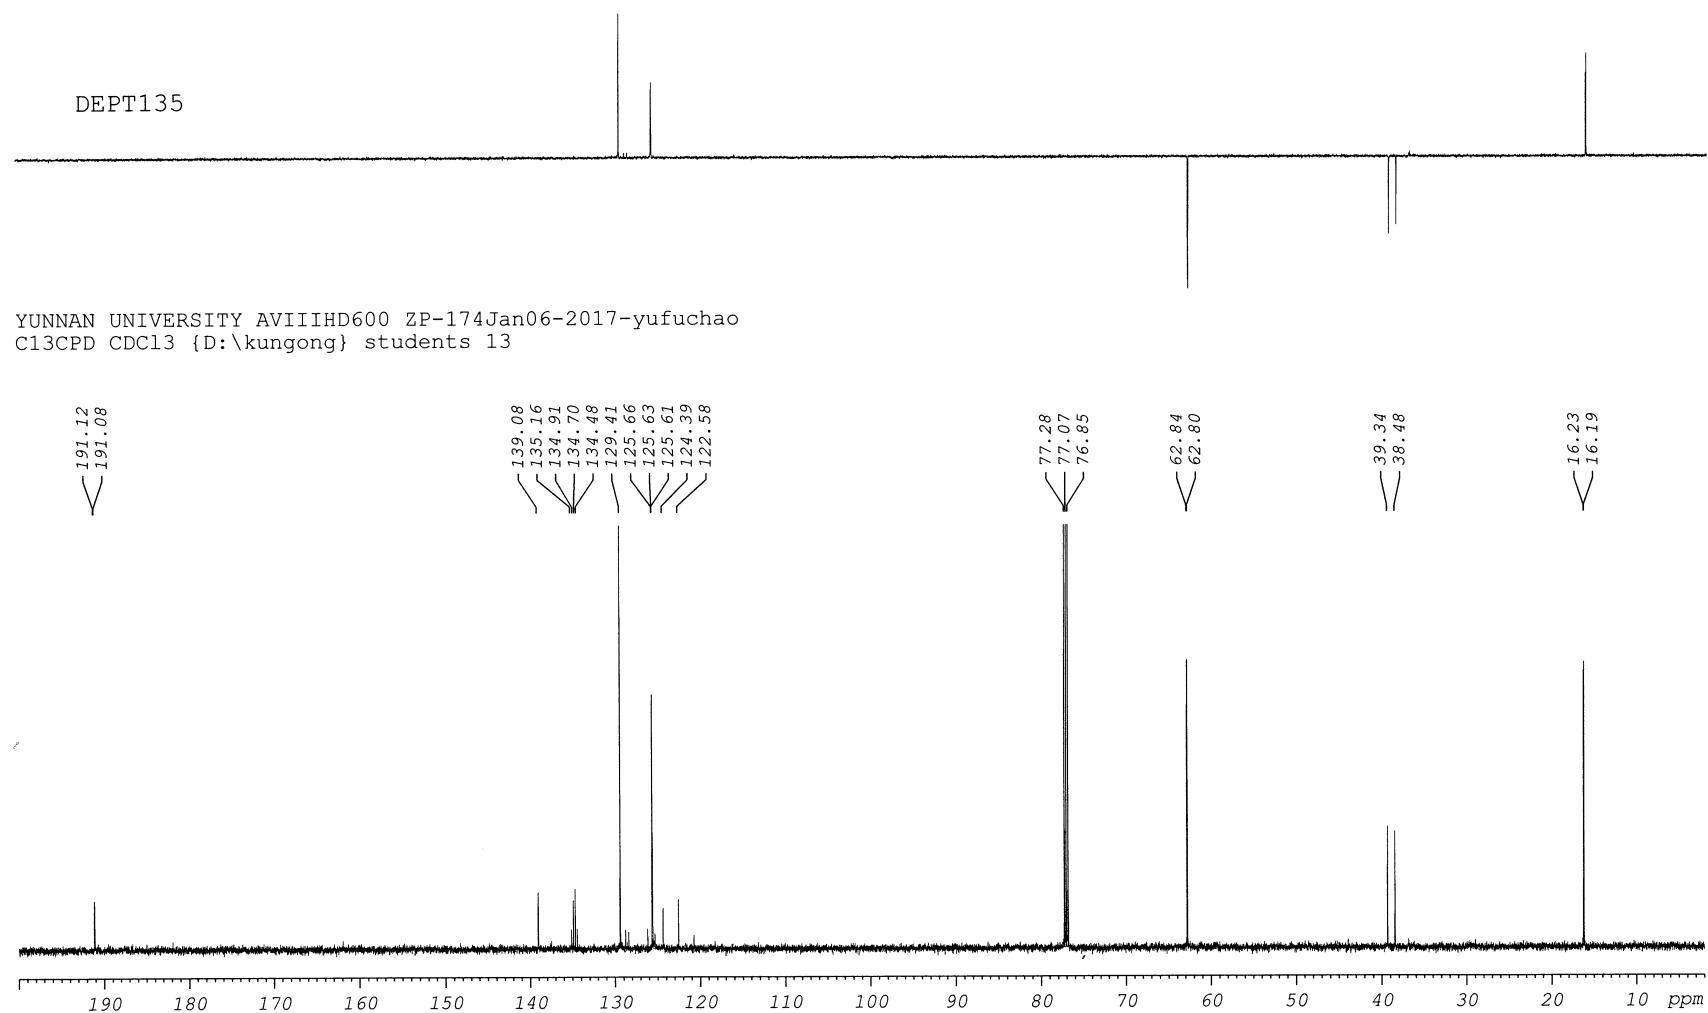

Figure S16.  $^{13}\text{C}$  NMR (150 MHz,  $\text{CDCl}_3$ ) spectra of compound **3g**

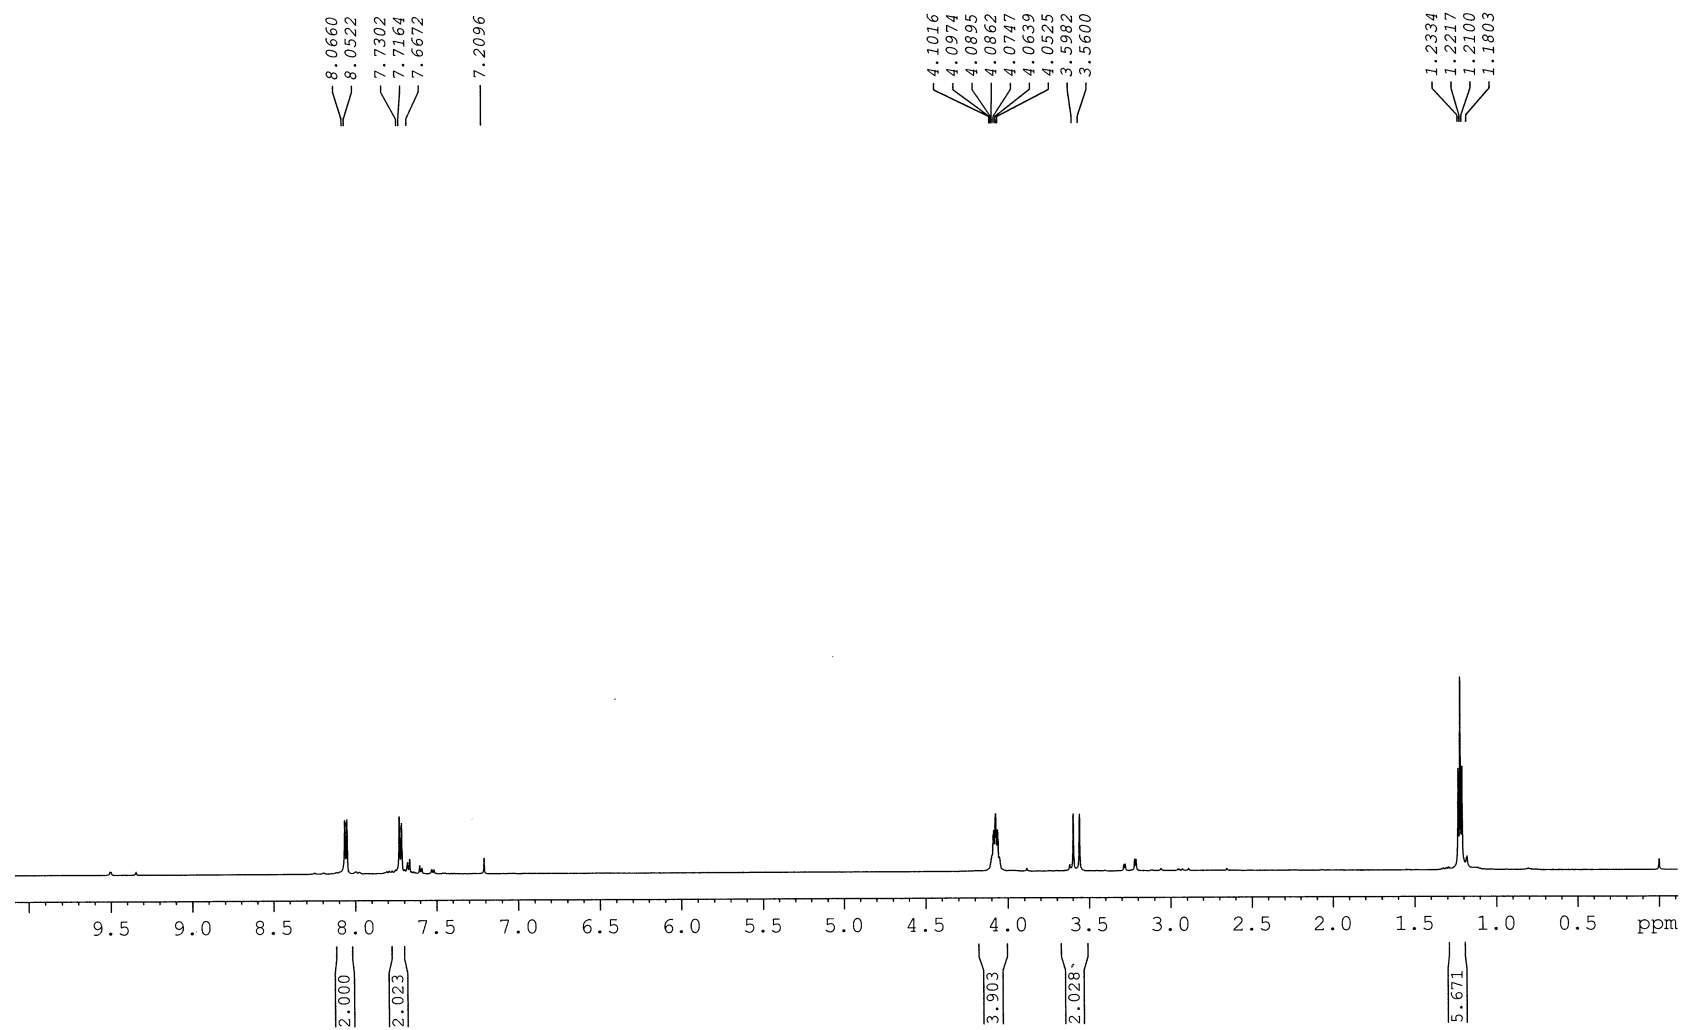

**Figure S17.** <sup>1</sup>H NMR (600 MHz, CDCl<sub>3</sub>) spectra of compound **3h**

DEPT135

YUNNAN UNIVERSITY AVIIIHD600 ZP-175  
Jan06-2017-yufuchao  
C13CPD CDC13

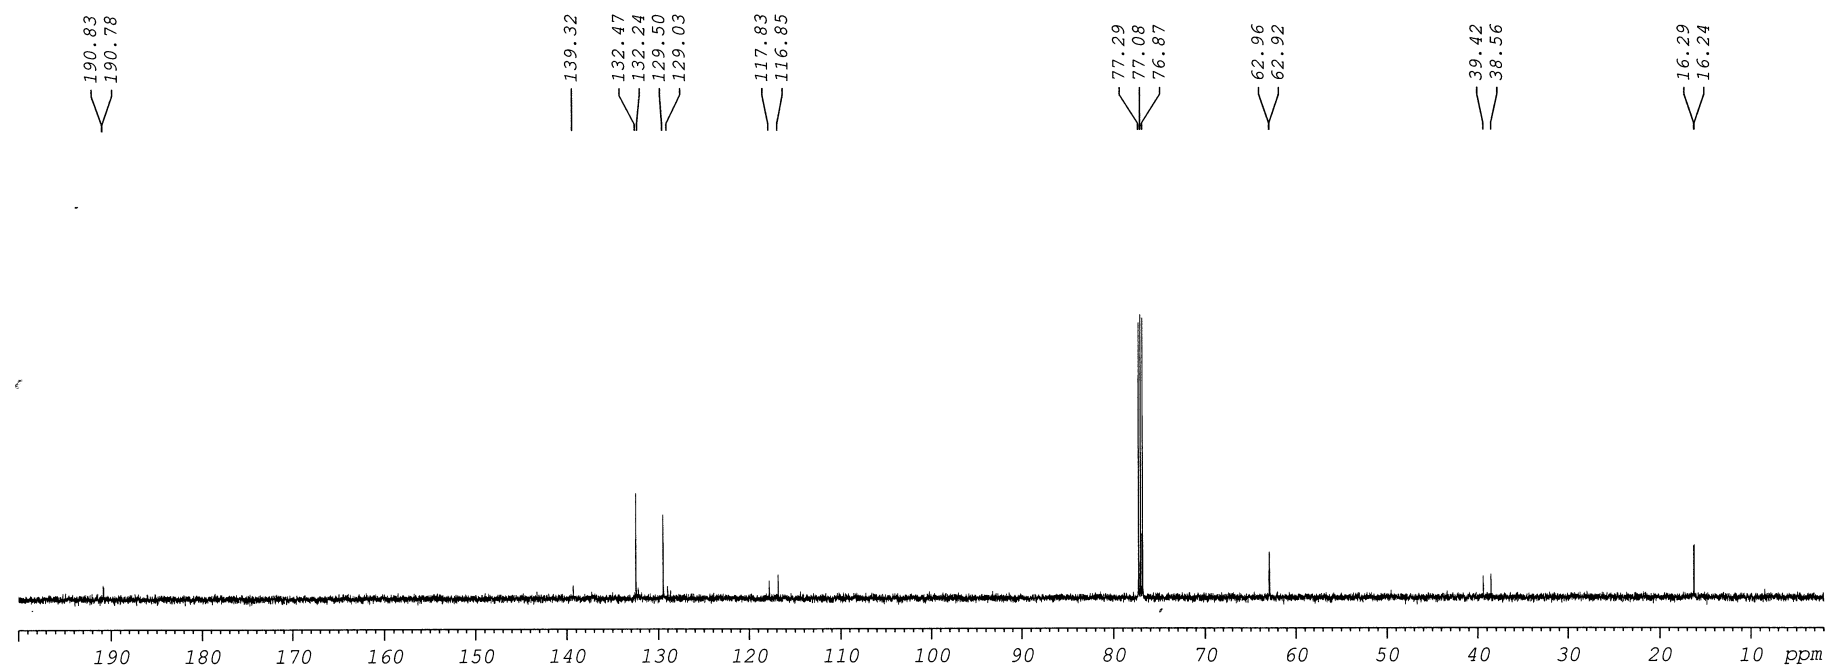

Figure S18.  $^{13}\text{C}$  NMR (150 MHz,  $\text{CDCl}_3$ ) spectra of compound **3h**

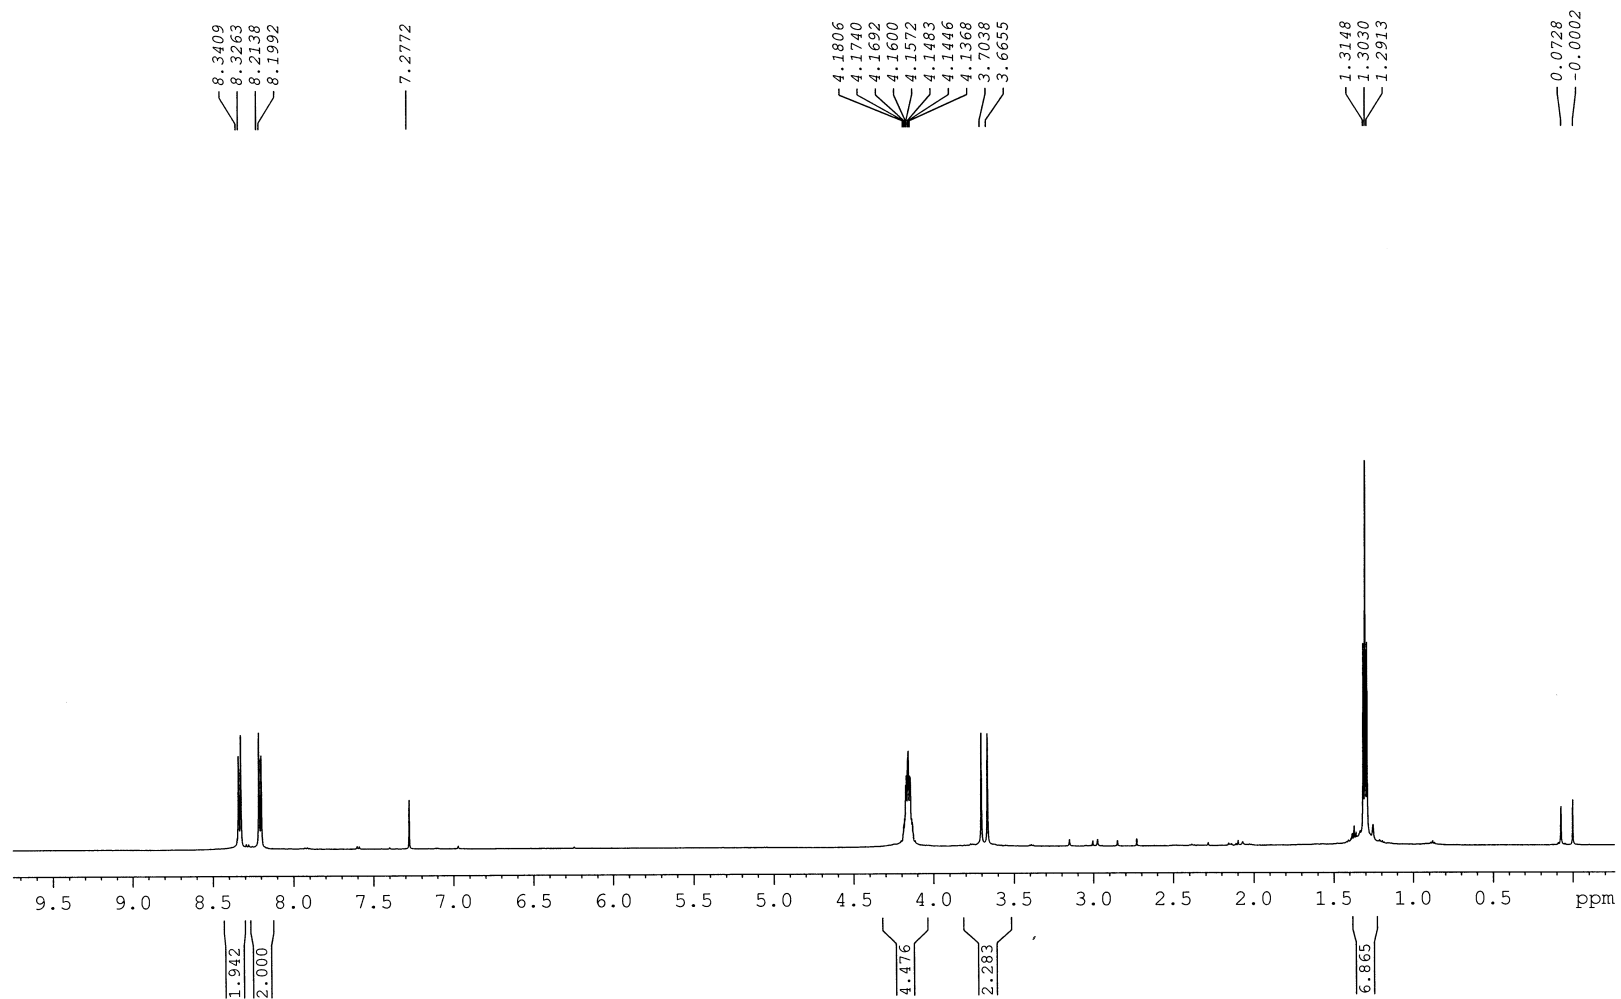

**Figure S19.** <sup>1</sup>H NMR (600 MHz, CDCl<sub>3</sub>) spectra of compound **3i**

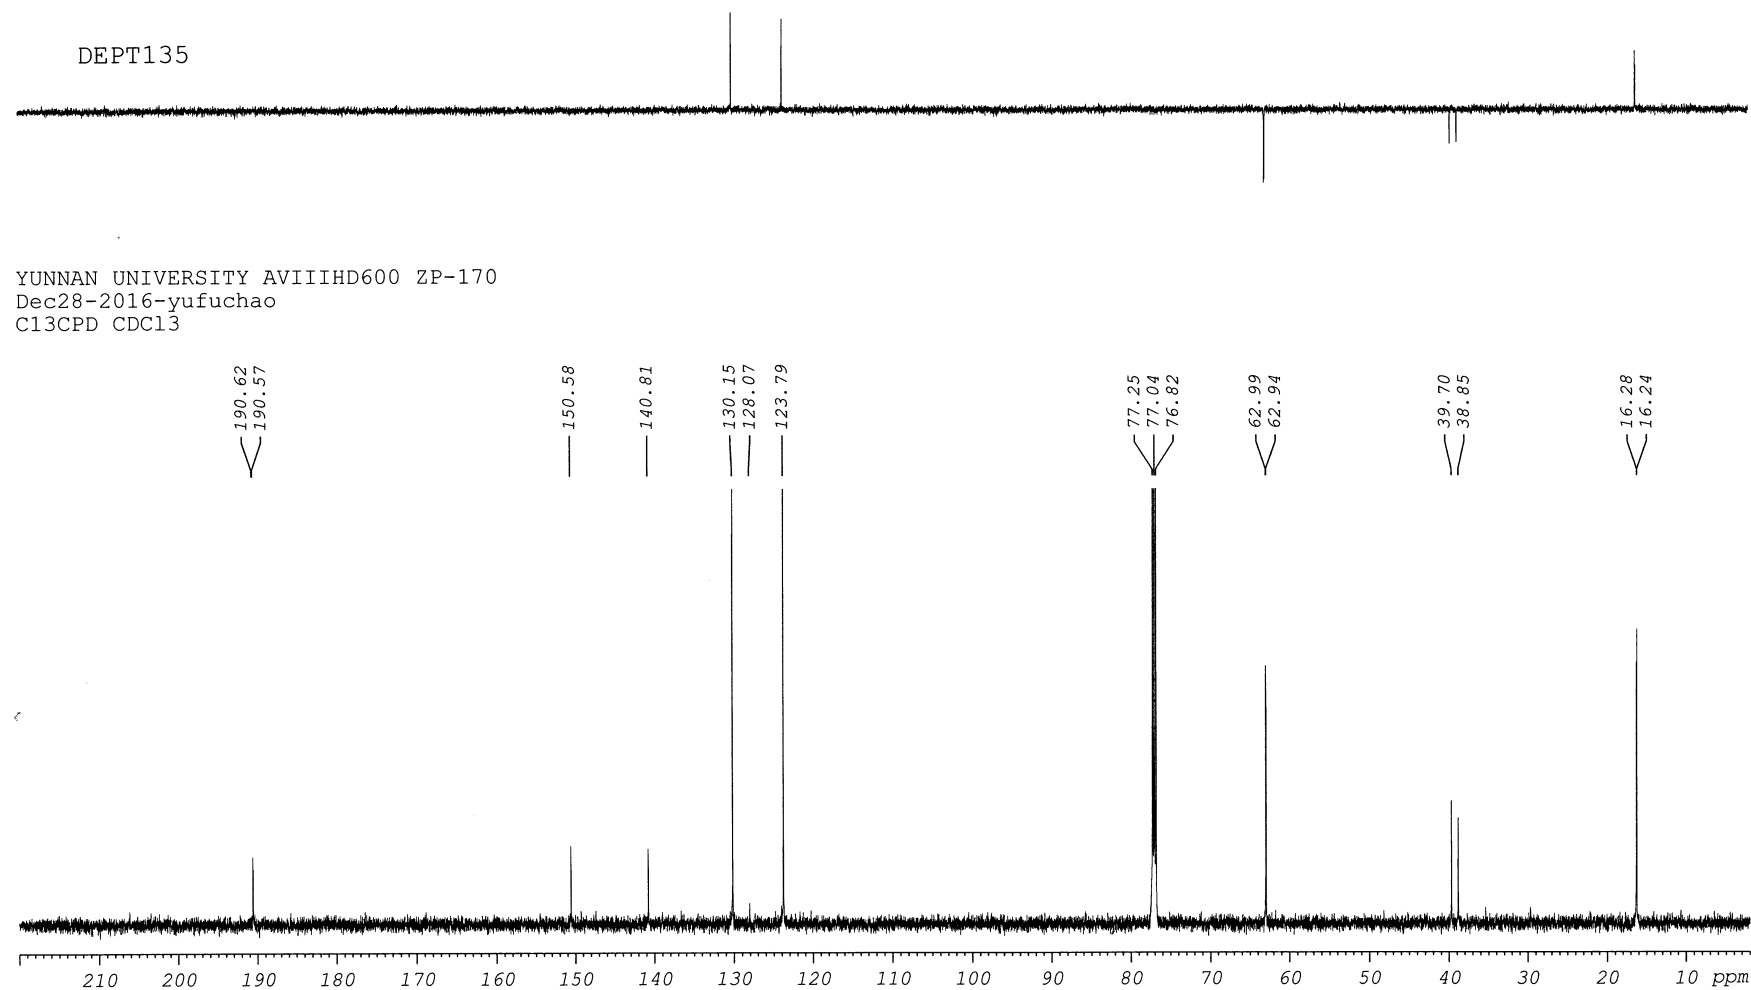

**Figure S20.**  $^{13}\text{C}$  NMR (150 MHz,  $\text{CDCl}_3$ ) spectra of compound **3i**

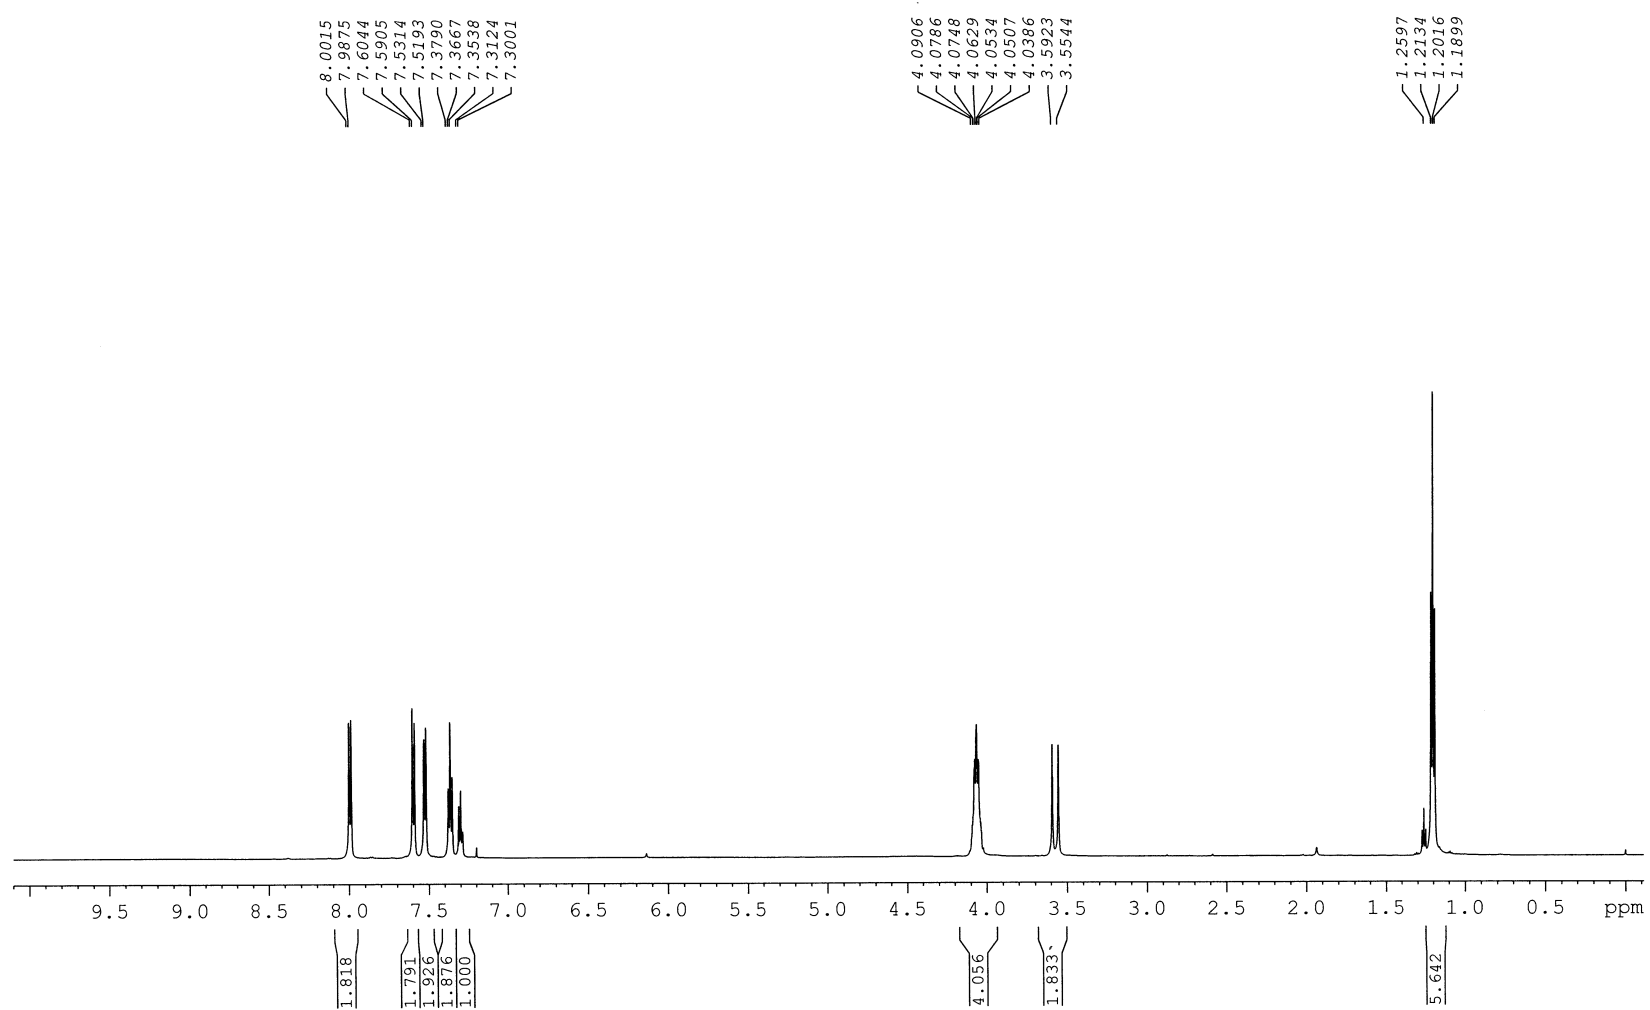

**Figure S21.** <sup>1</sup>H NMR (600 MHz, CDCl<sub>3</sub>) spectra of compound **3j**

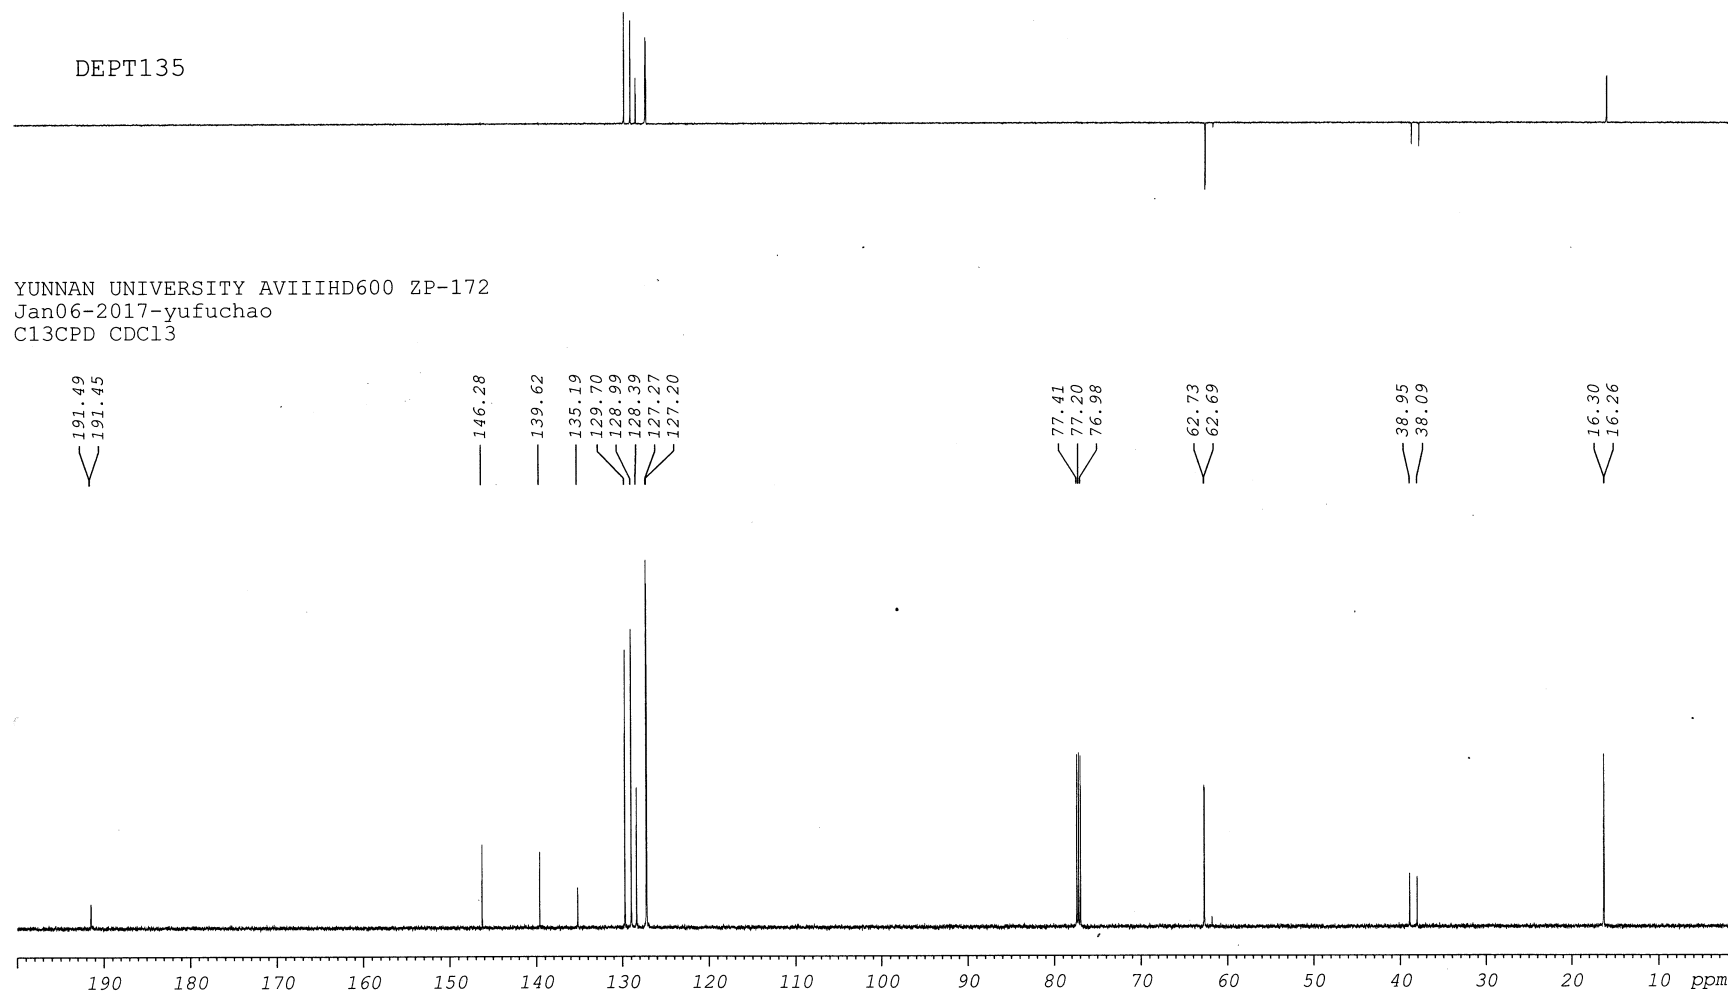

**Figure S22.**  $^{13}\text{C}$  NMR (150 MHz,  $\text{CDCl}_3$ ) spectra of compound **3j**



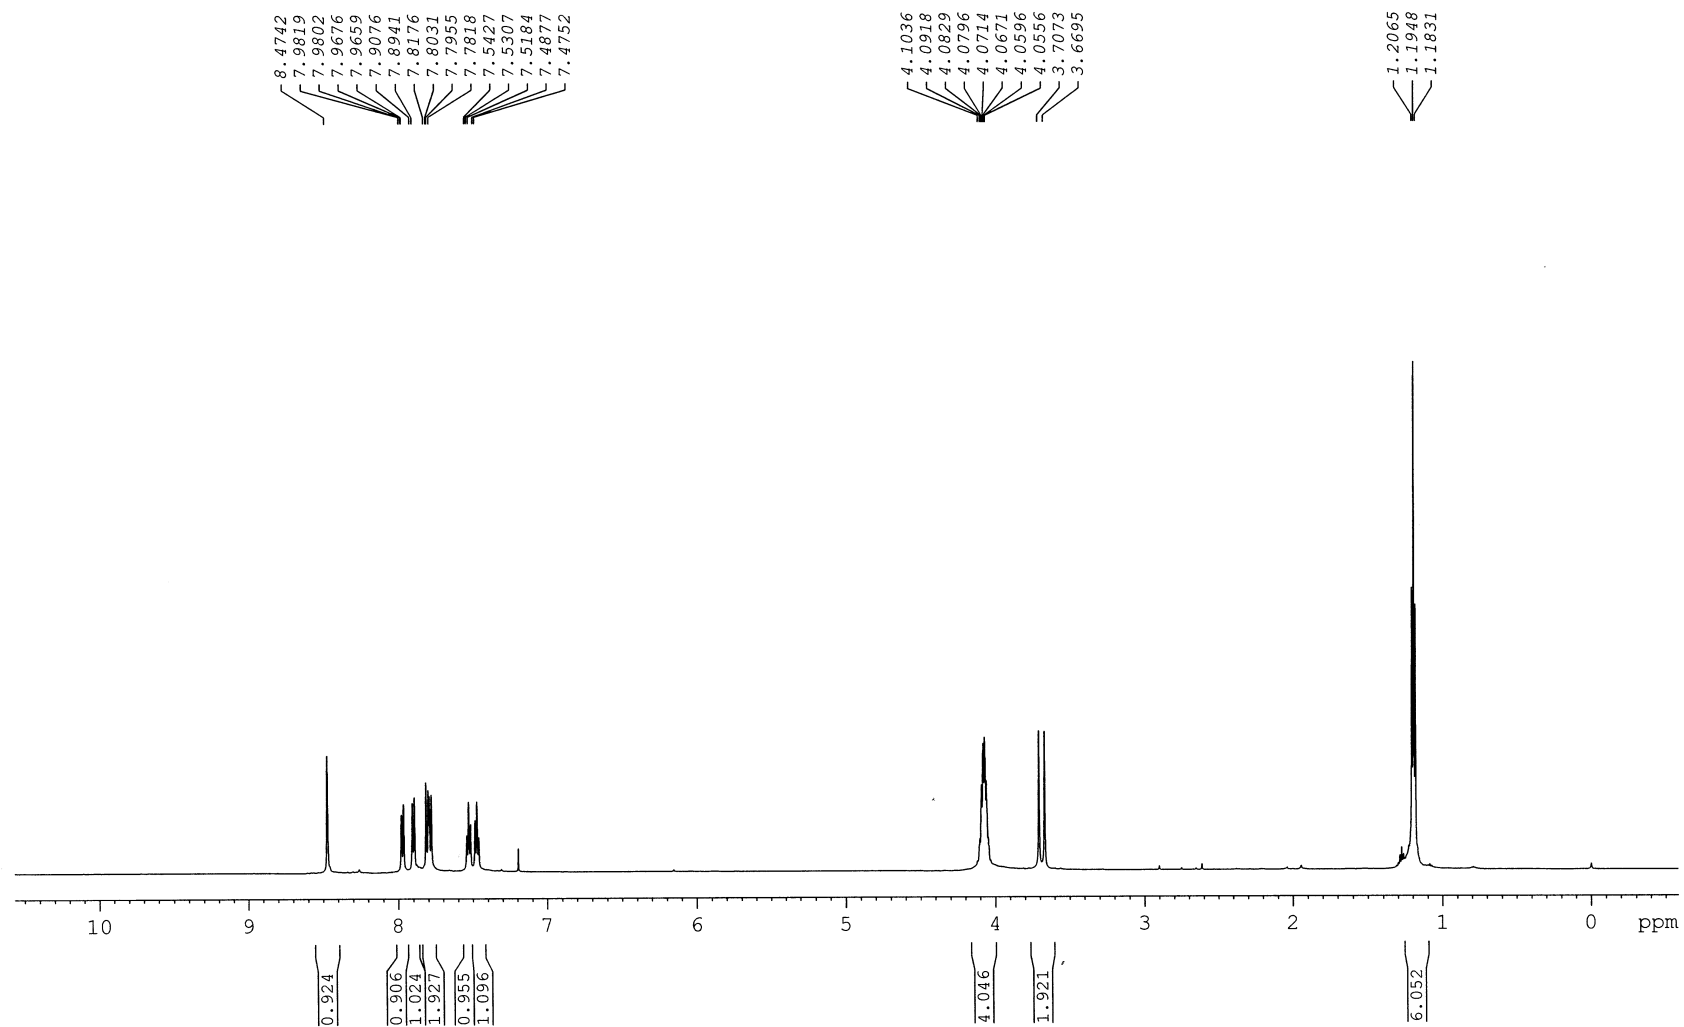

**Figure S23.** <sup>1</sup>H NMR (600 MHz, CDCl<sub>3</sub>) spectra of compound **3k**

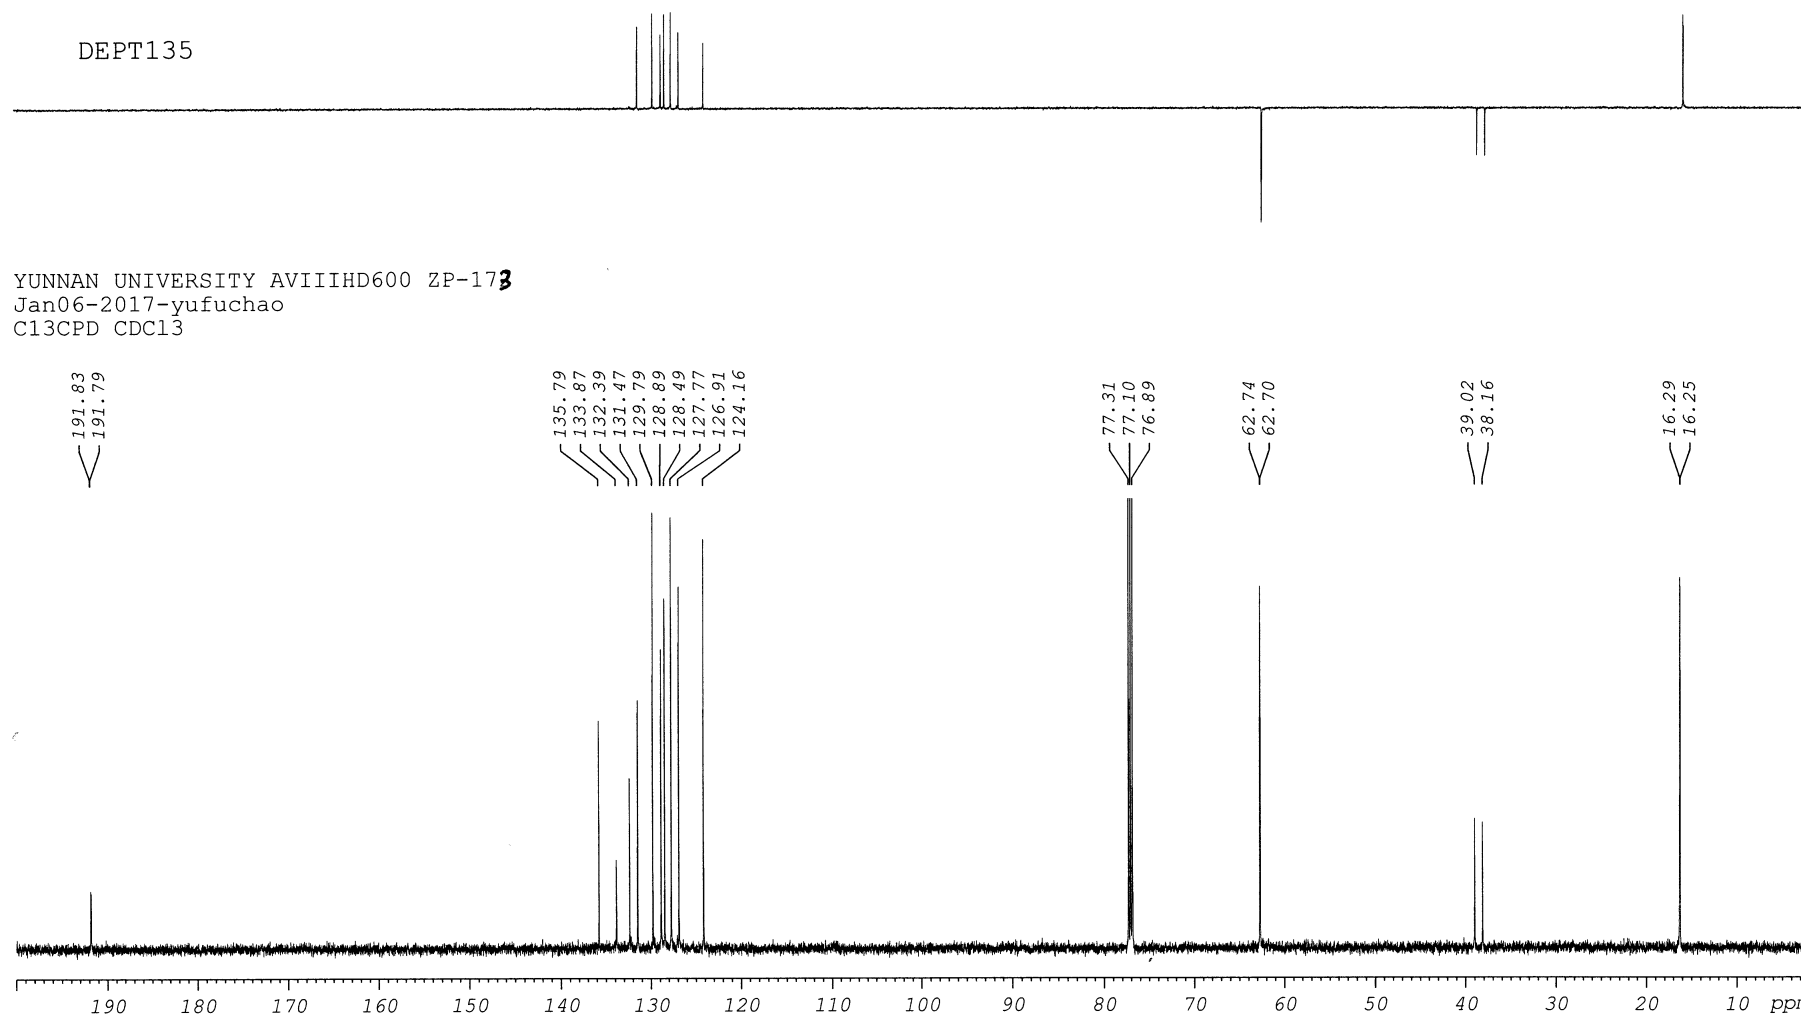

Figure S24.  $^{13}\text{C}$  NMR (150 MHz,  $\text{CDCl}_3$ ) spectra of compound **3k**

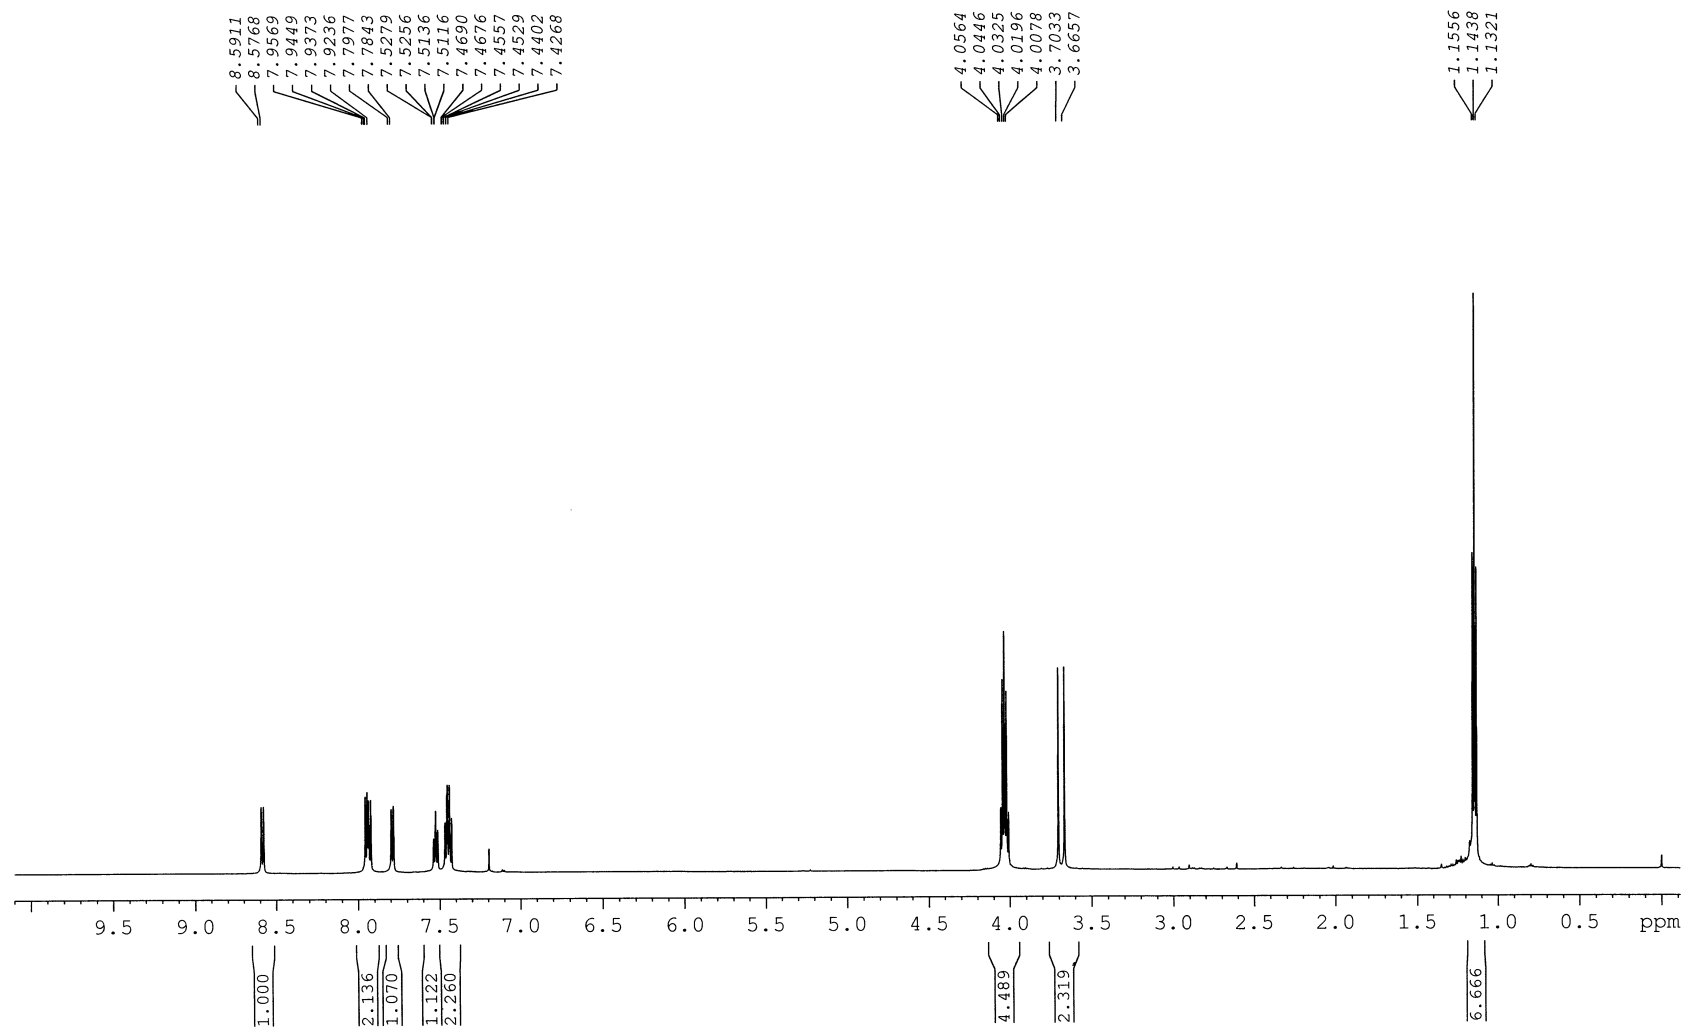

Figure S25.  $^1\text{H}$  NMR (600 MHz,  $\text{CDCl}_3$ ) spectra of compound **3l**

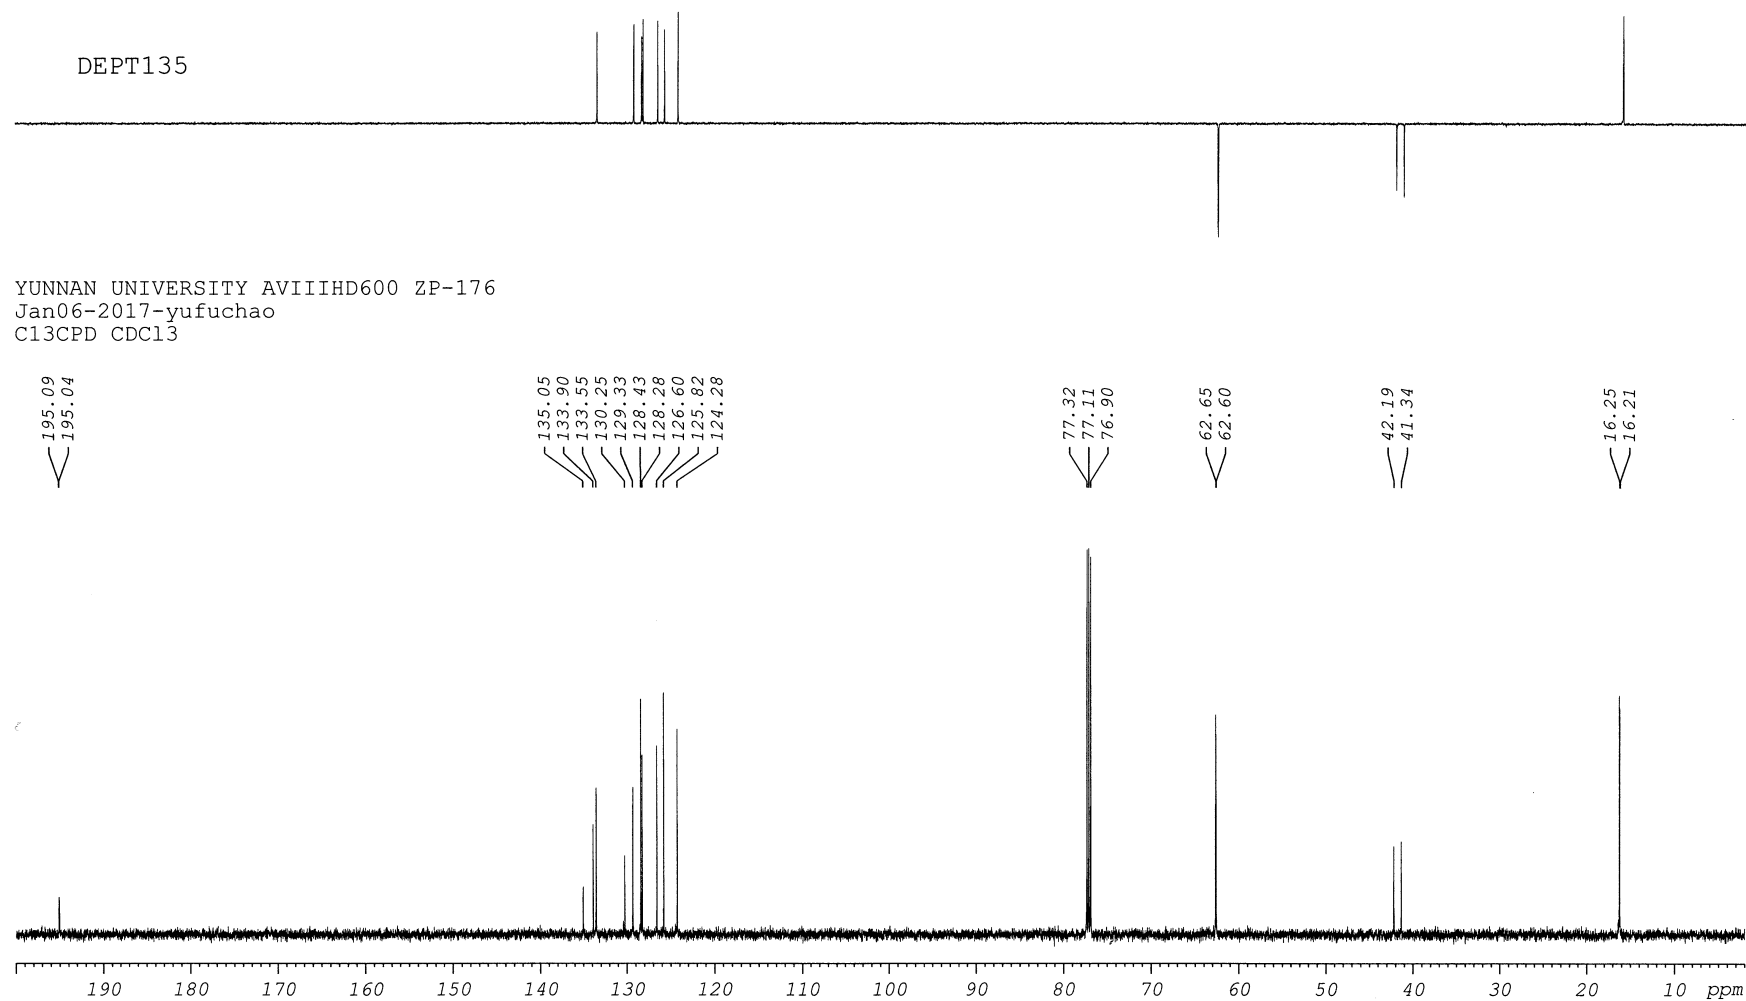

Figure S26.  $^{13}\text{C}$  NMR (150 MHz,  $\text{CDCl}_3$ ) spectra of compound **31**

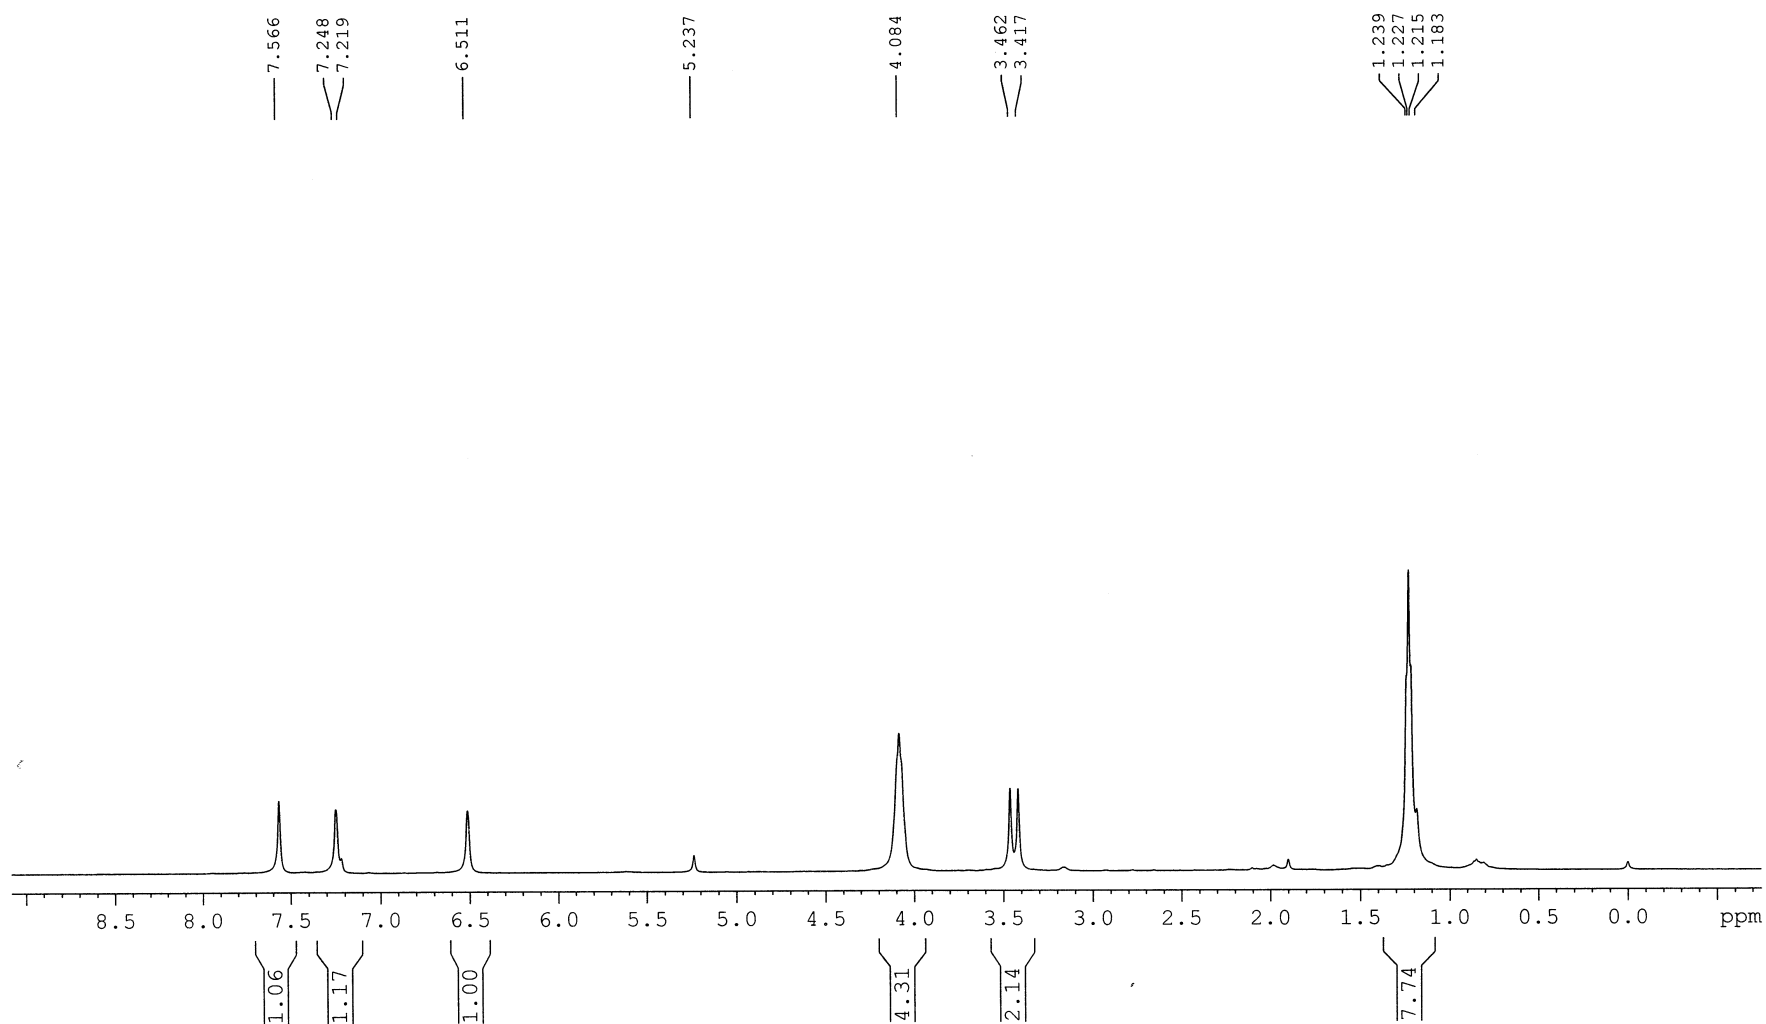

**Figure S27.**  $^1\text{H}$  NMR (500 MHz,  $\text{CDCl}_3$ ) spectra of compound **3m**

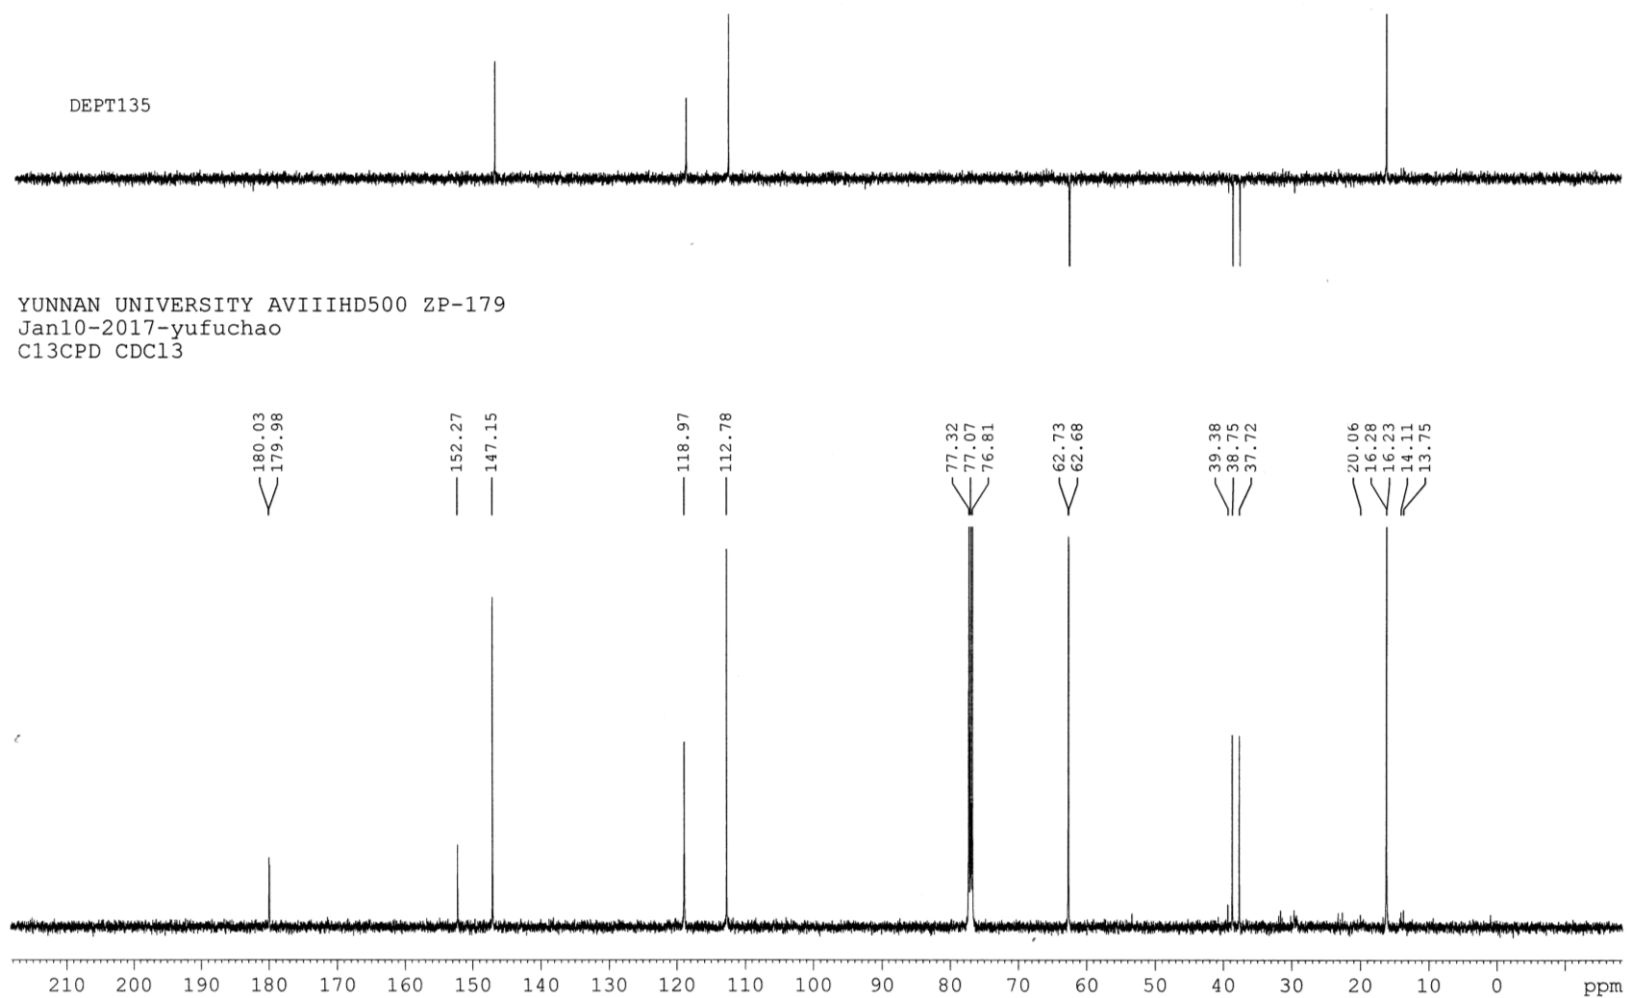

**Figure S28.**  $^{13}\text{C}$  NMR (125 MHz,  $\text{CDCl}_3$ ) spectra of compound **3m**

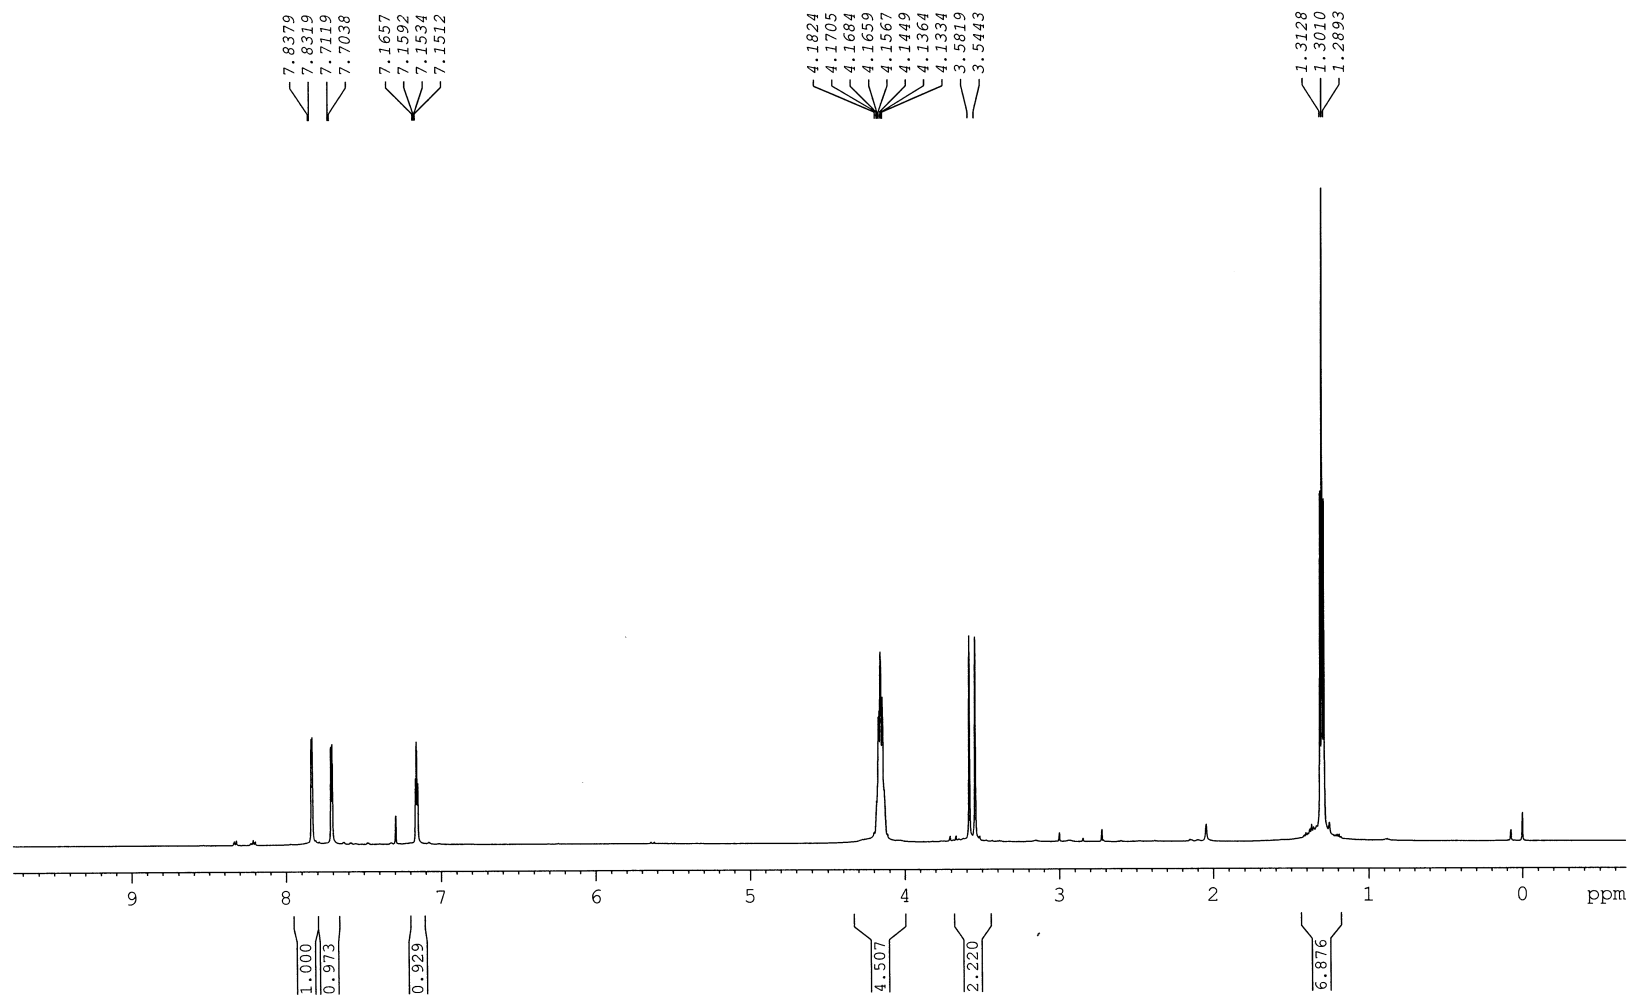

**Figure S29.**  $^1\text{H}$  NMR (600 MHz,  $\text{CDCl}_3$ ) spectra of compound **3n**

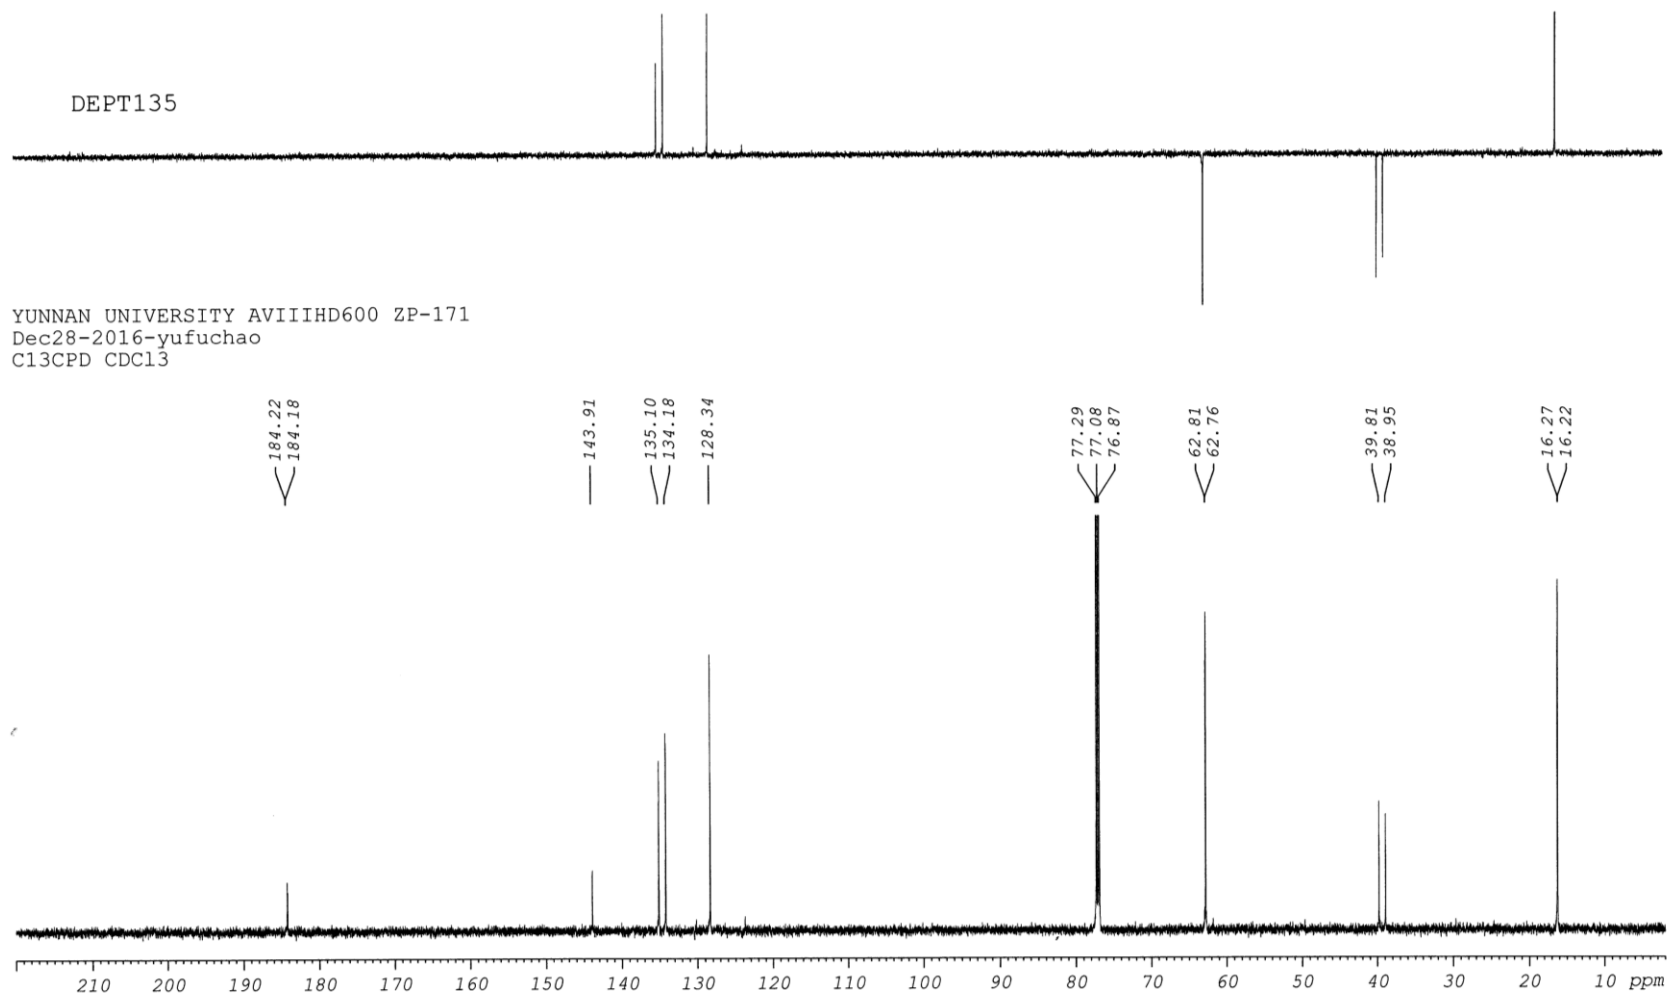

**Figure S30.**  $^{13}\text{C}$  NMR (150 MHz,  $\text{CDCl}_3$ ) spectra of compound **3n**



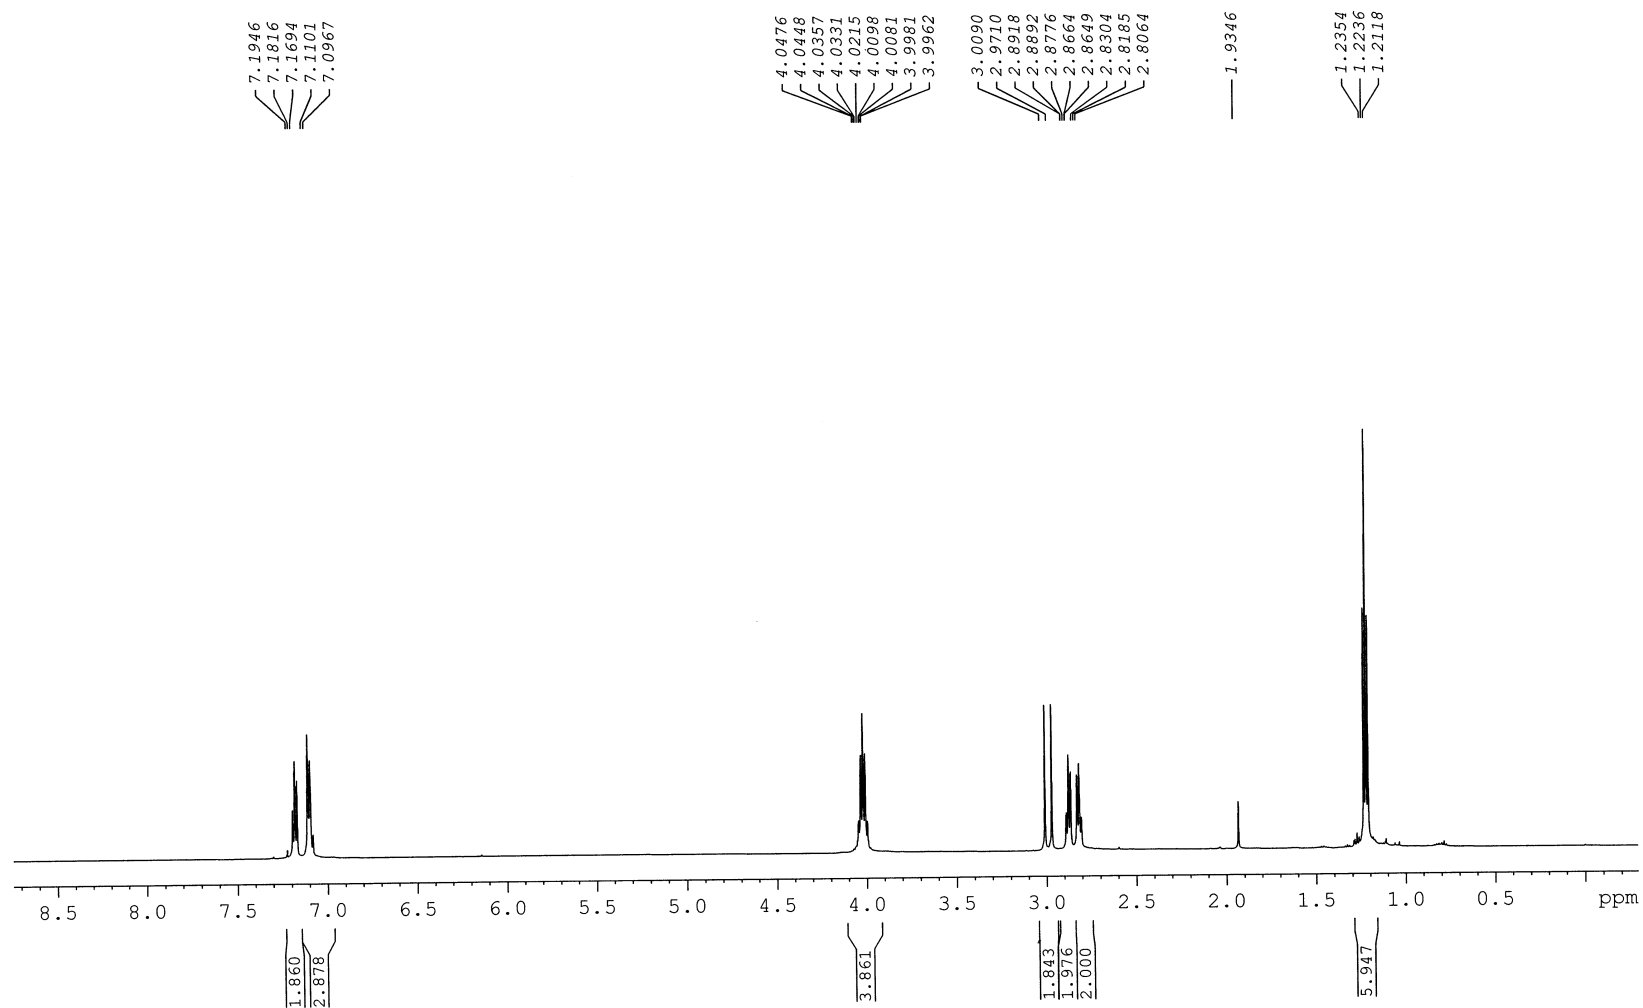

**Figure S31.**  $^1\text{H}$  NMR (600 MHz,  $\text{CDCl}_3$ ) spectra of compound **3q**

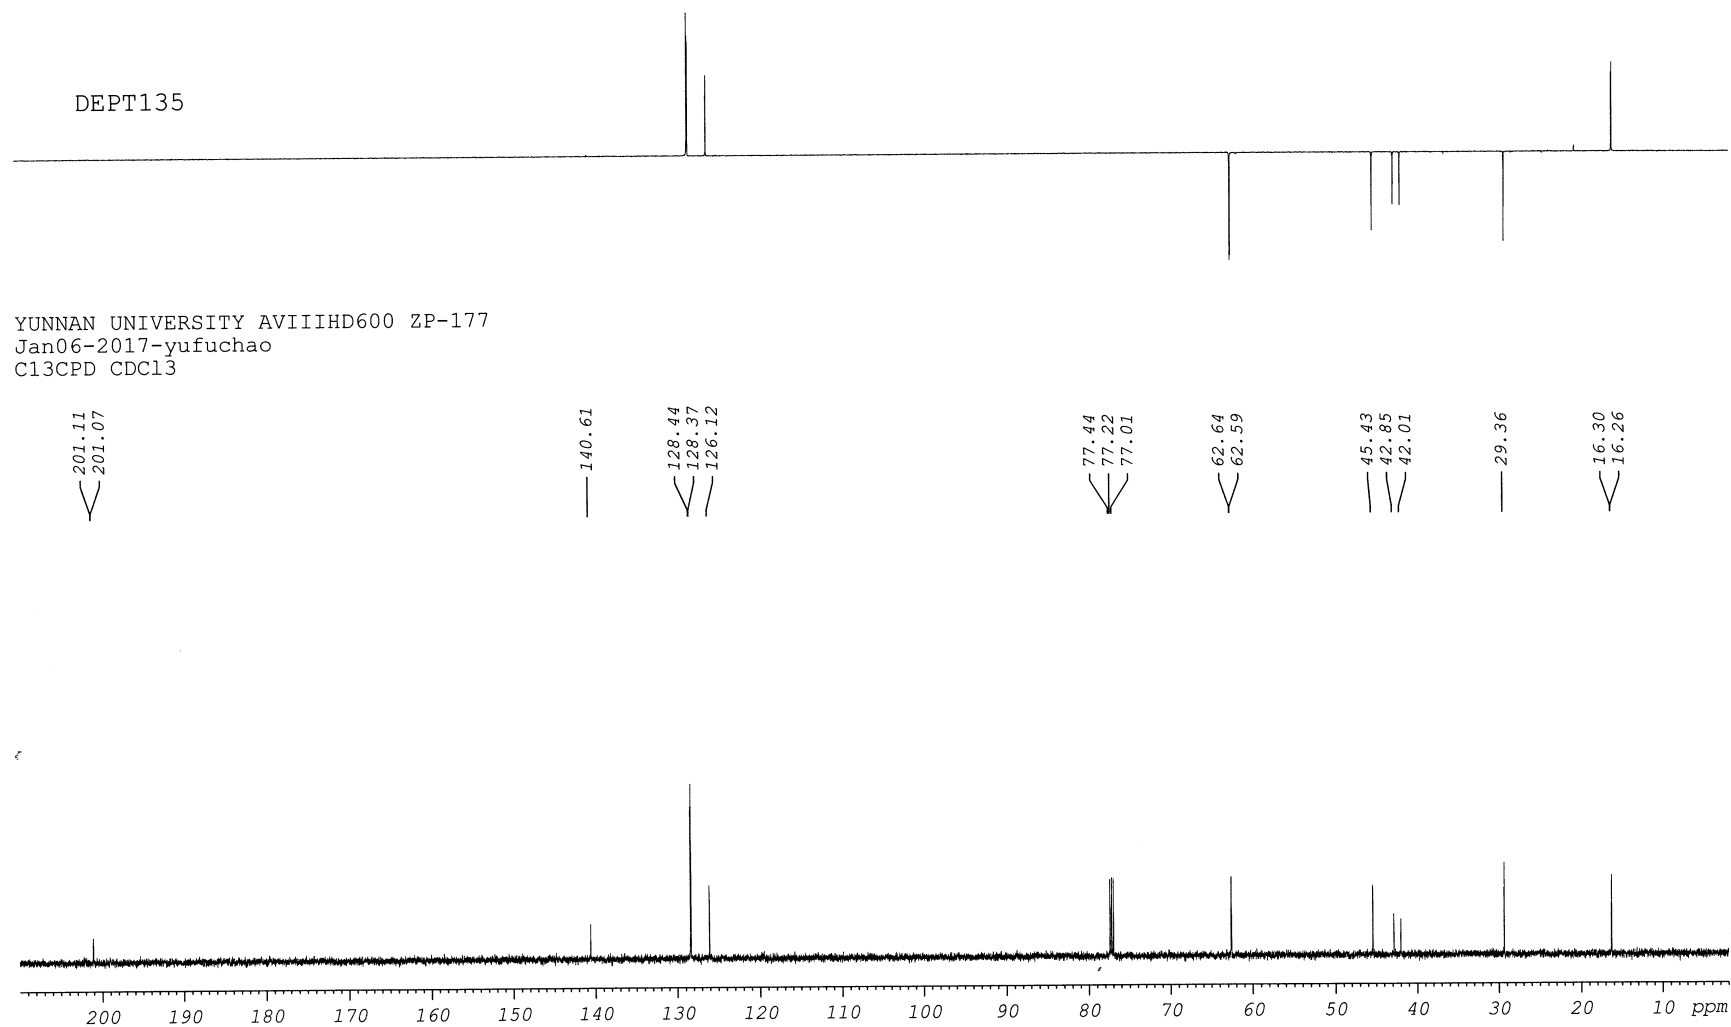

Figure S32.  $^{13}\text{C}$  NMR (150 MHz,  $\text{CDCl}_3$ ) spectra of compound **3q**

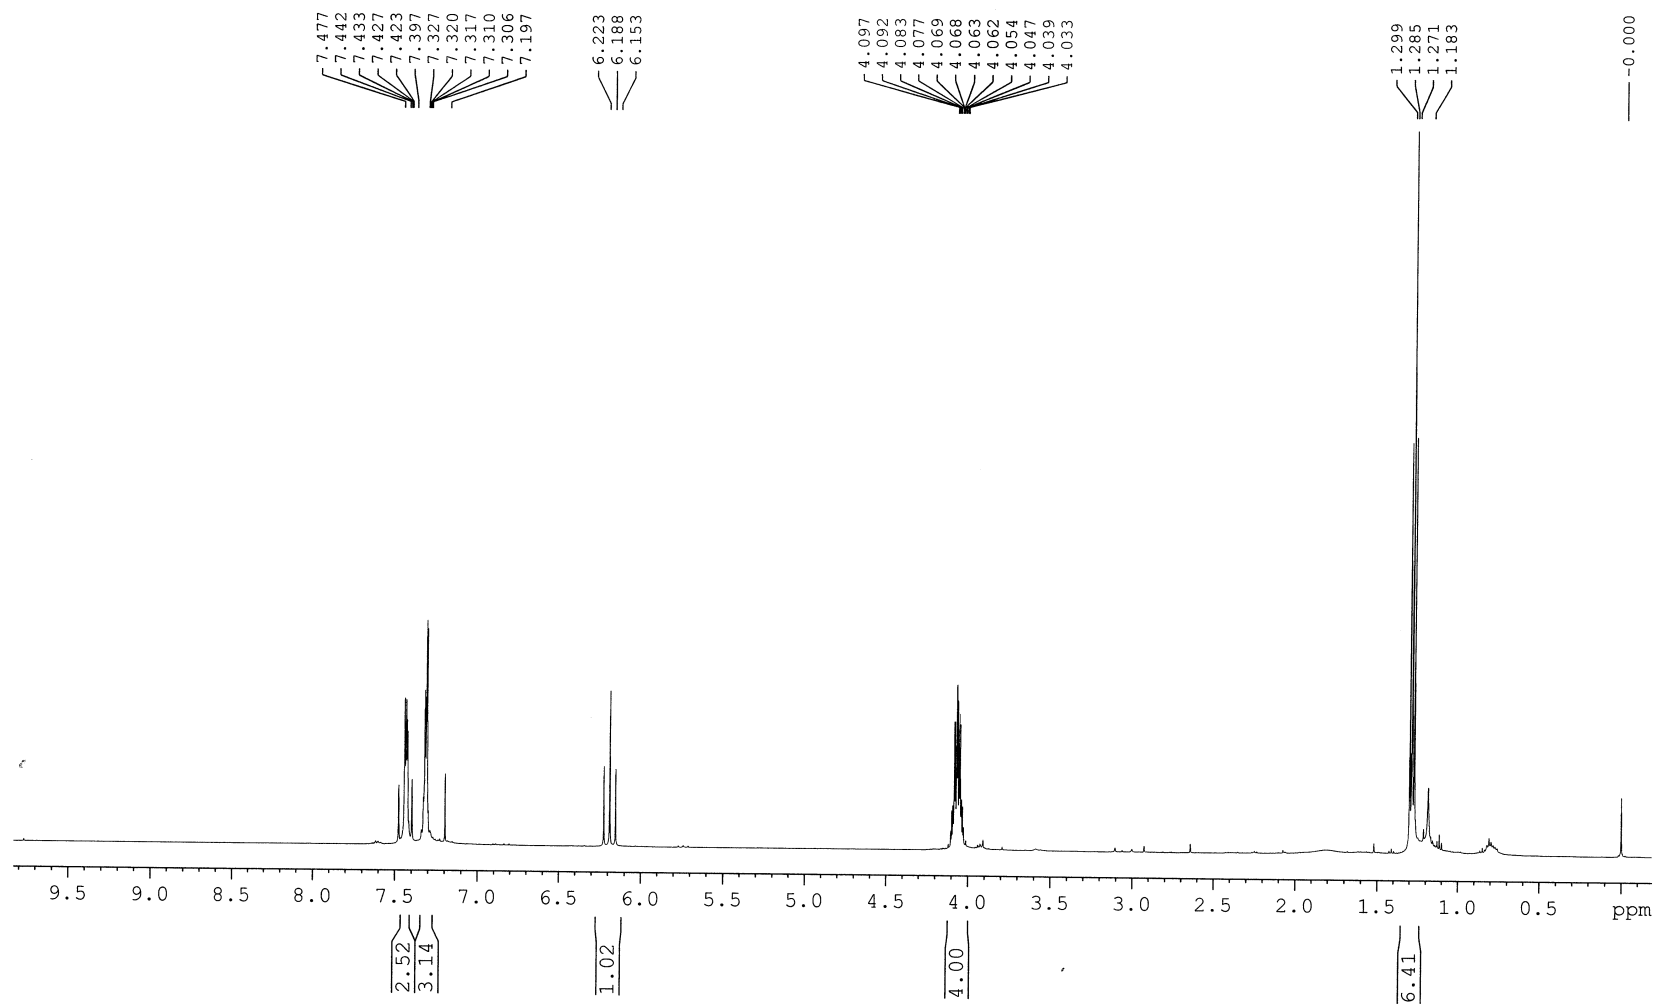

**Figure S33.**  $^1\text{H}$  NMR (500 MHz,  $\text{CDCl}_3$ ) spectra of compound **3r**

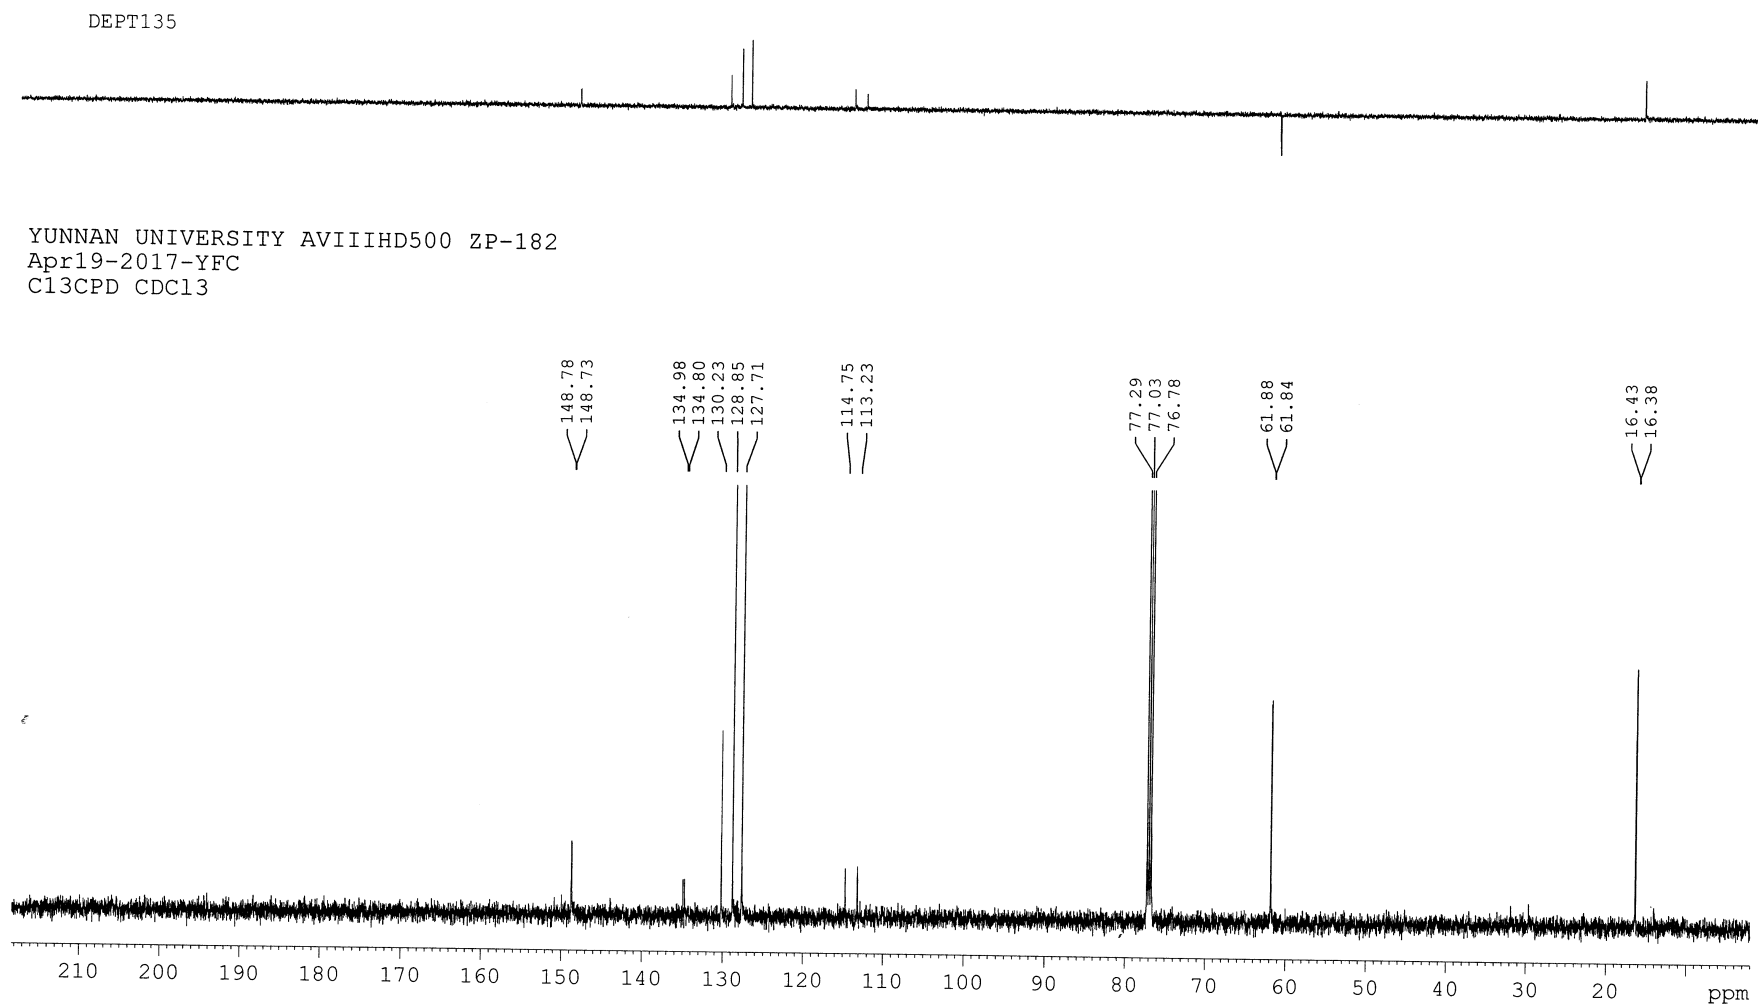

**Figure S34.**  $^{13}\text{C}$  NMR (125 MHz,  $\text{CDCl}_3$ ) spectra of compound **3r**

Sep08-2017-yufuchao  
 YUNNAN UNIVERSITY AVIIIHD500 ZP-260  
 Sep08-2017-yufuchao  
 PROTON CDCl<sub>3</sub> {D:\kungong} yufuchao 46

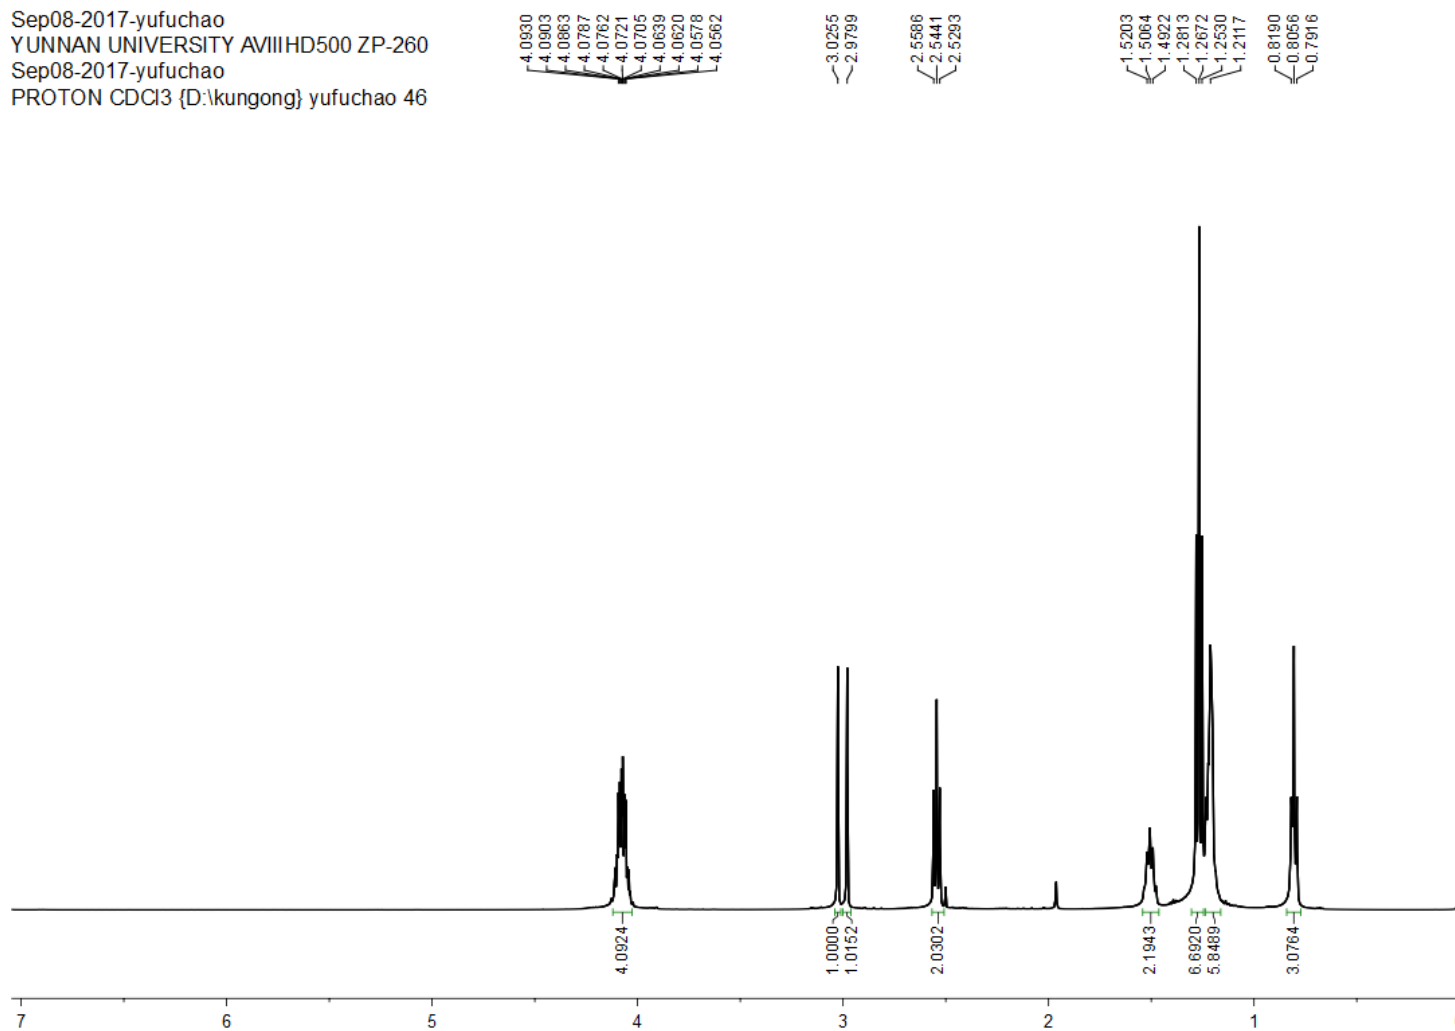

Figure S35. <sup>1</sup>H NMR (500 MHz, CDCl<sub>3</sub>) spectra of compound **3s**

Sep08-2017-yufuchao  
YUNNAN UNIVERSITY AMIHD500 ZP-260  
Sep08-2017-yufuchao  
C13DEPT135p CDCl3 {D:\kungong} yufuchao 46

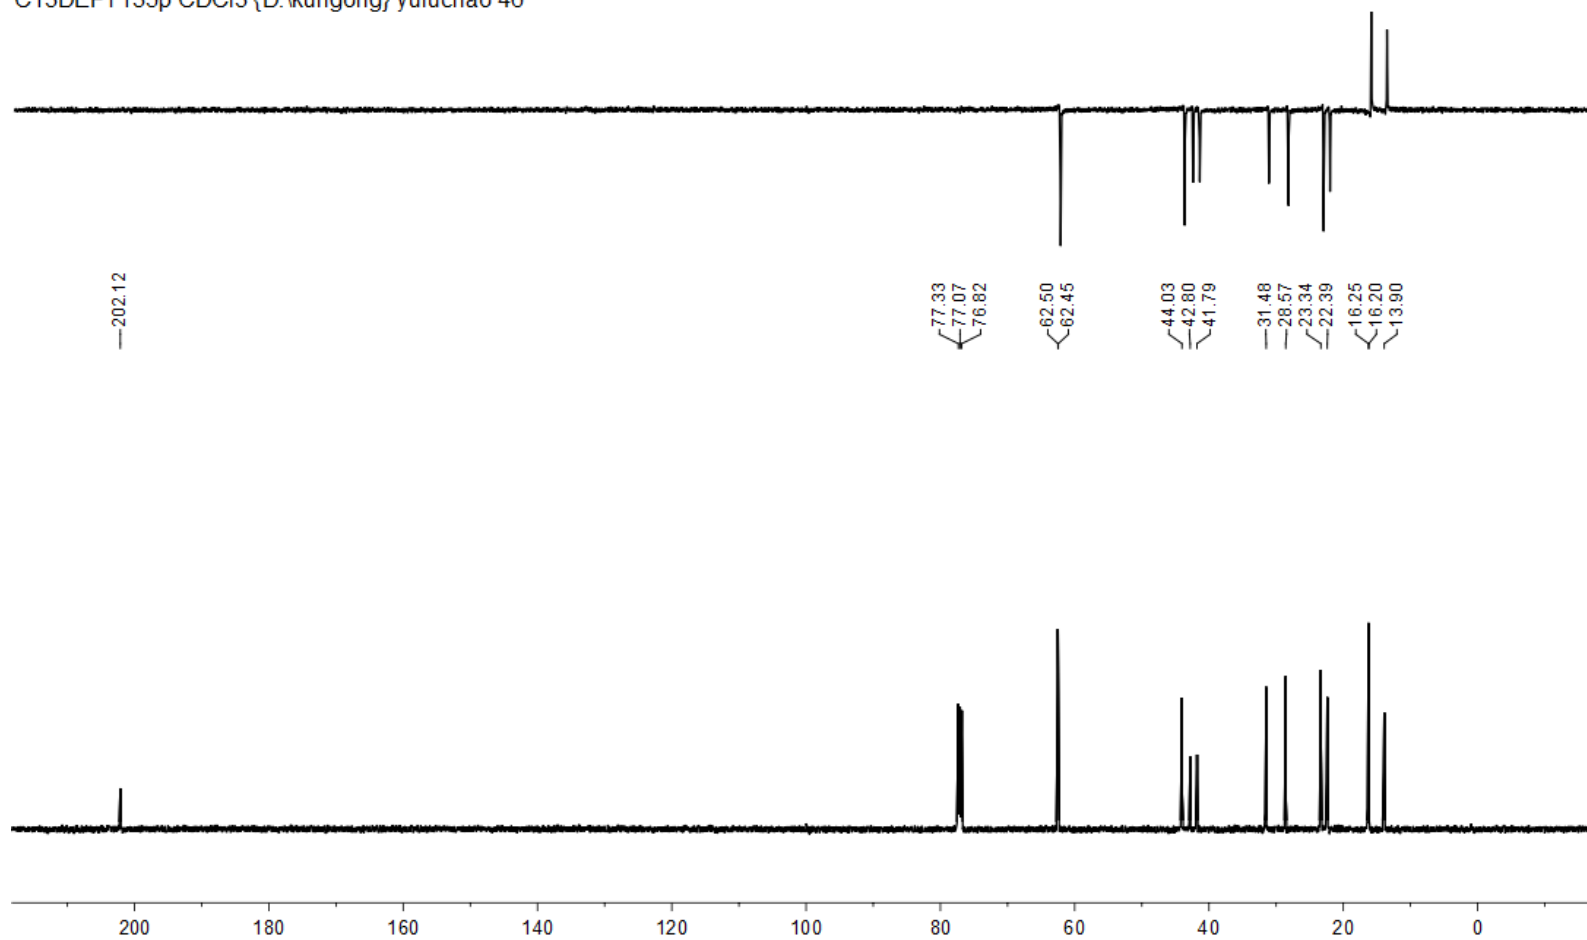

**Figure S36.**  $^{13}\text{C}$  NMR (125 MHz,  $\text{CDCl}_3$ ) spectra of compound **3s**

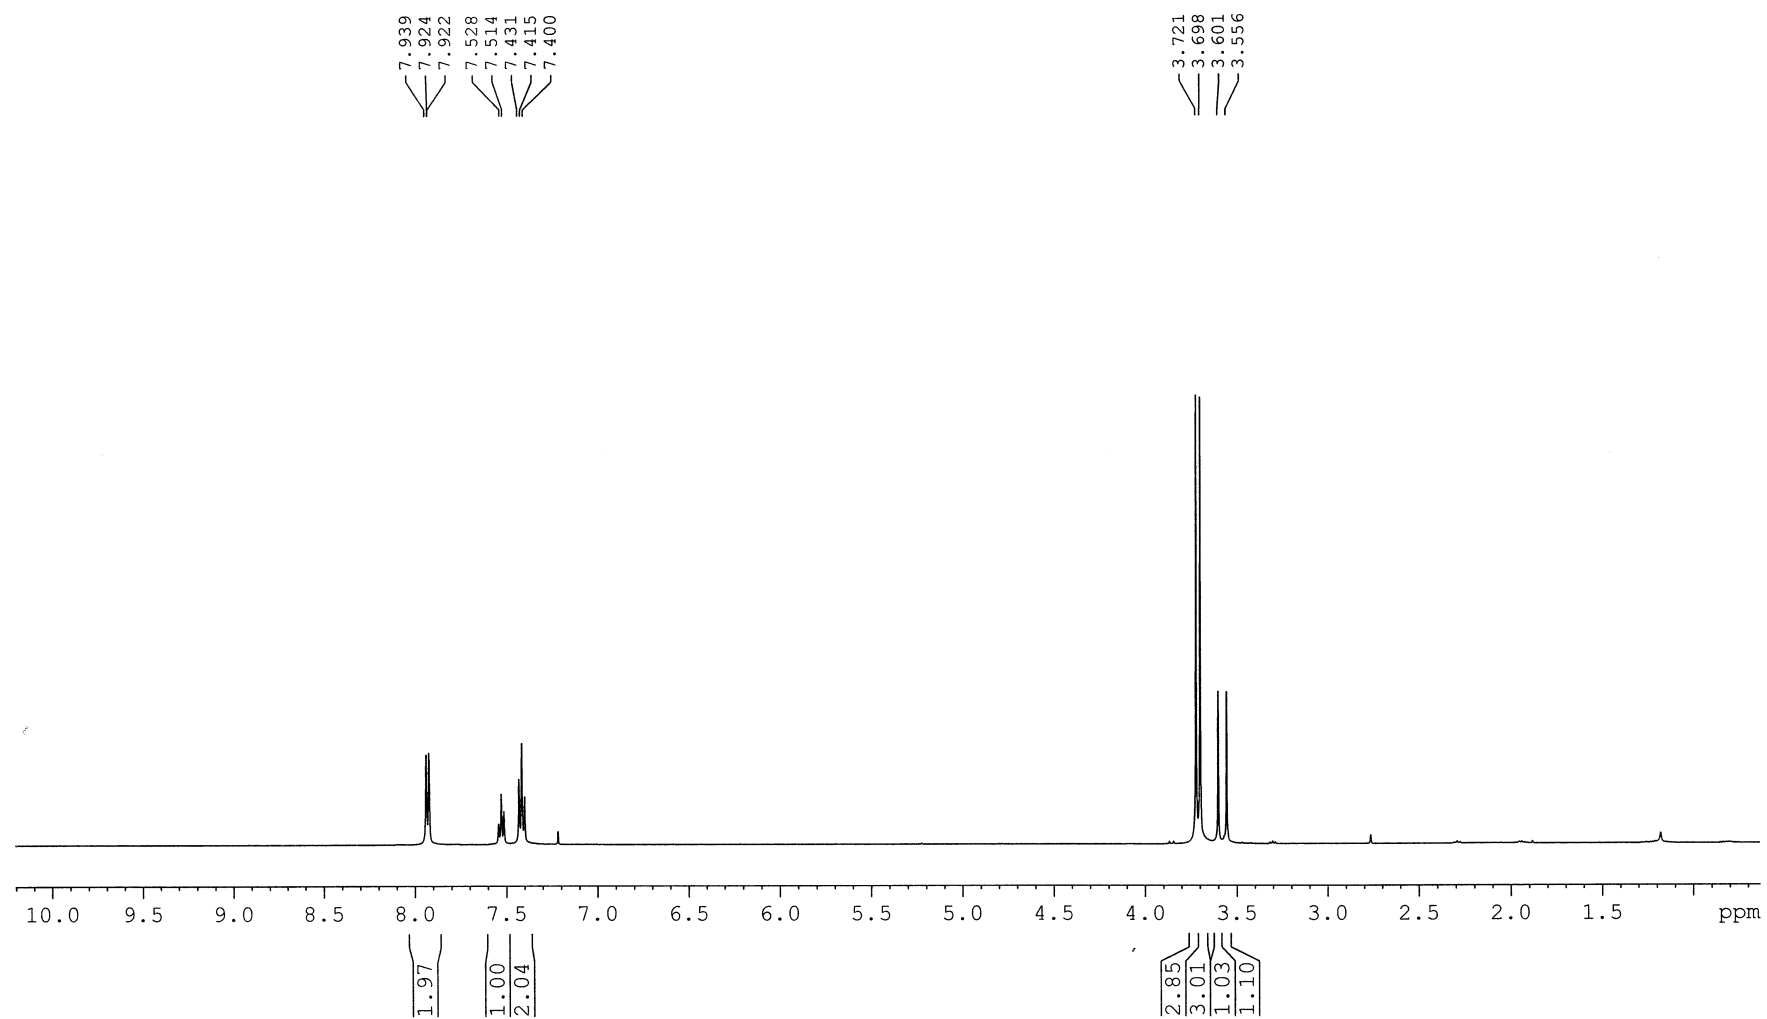

**Figure S37.**  $^1\text{H}$  NMR (500 MHz,  $\text{CDCl}_3$ ) spectra of compound **3t**

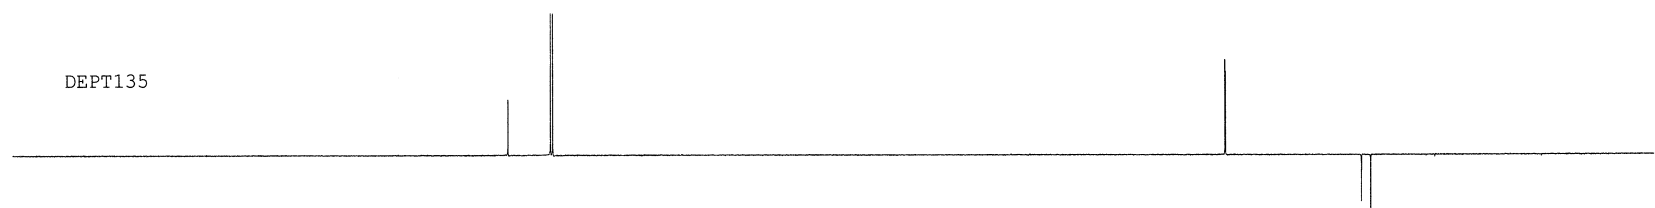

YUNNAN UNIVERSITY AVIIIHD500 ZP-183  
Jan16-2017-yufuchao  
C13CPD CDC13

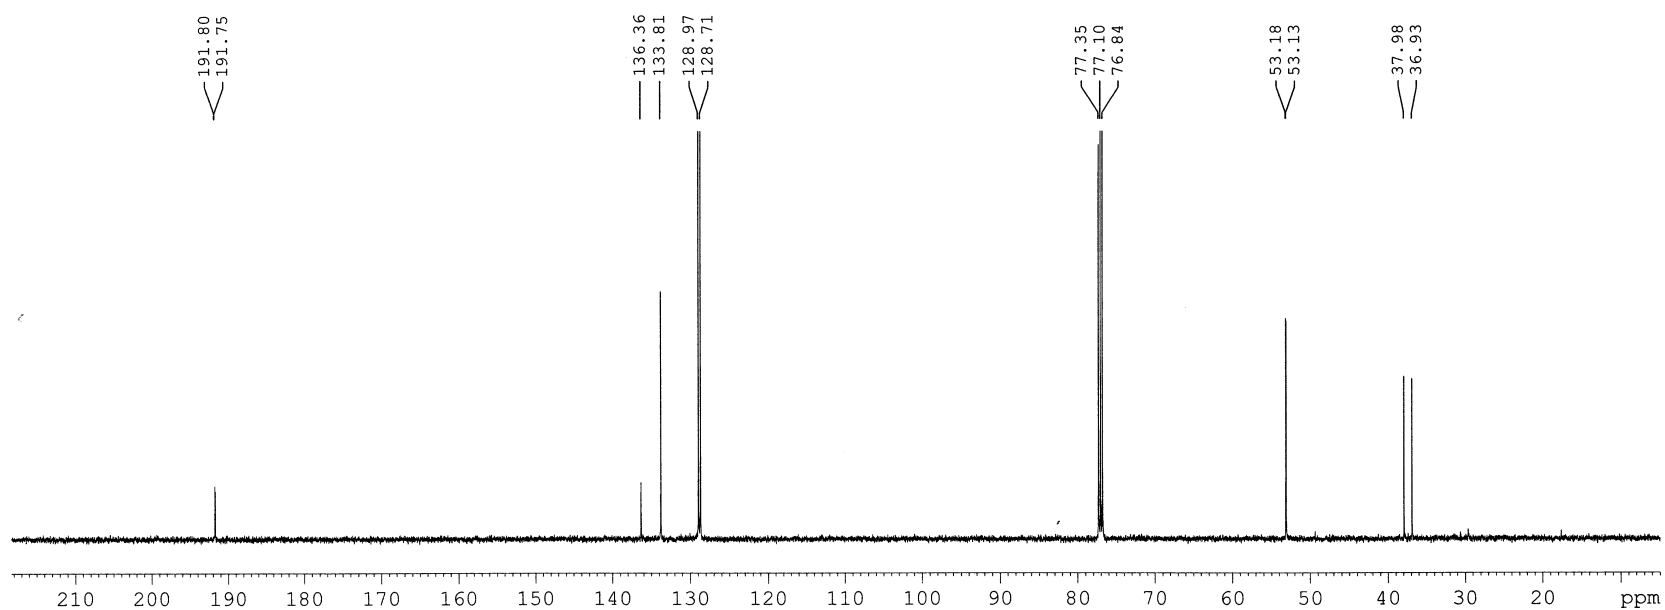

**Figure S38.**  $^{13}\text{C}$  NMR (125 MHz,  $\text{CDCl}_3$ ) spectra of compound **3t**



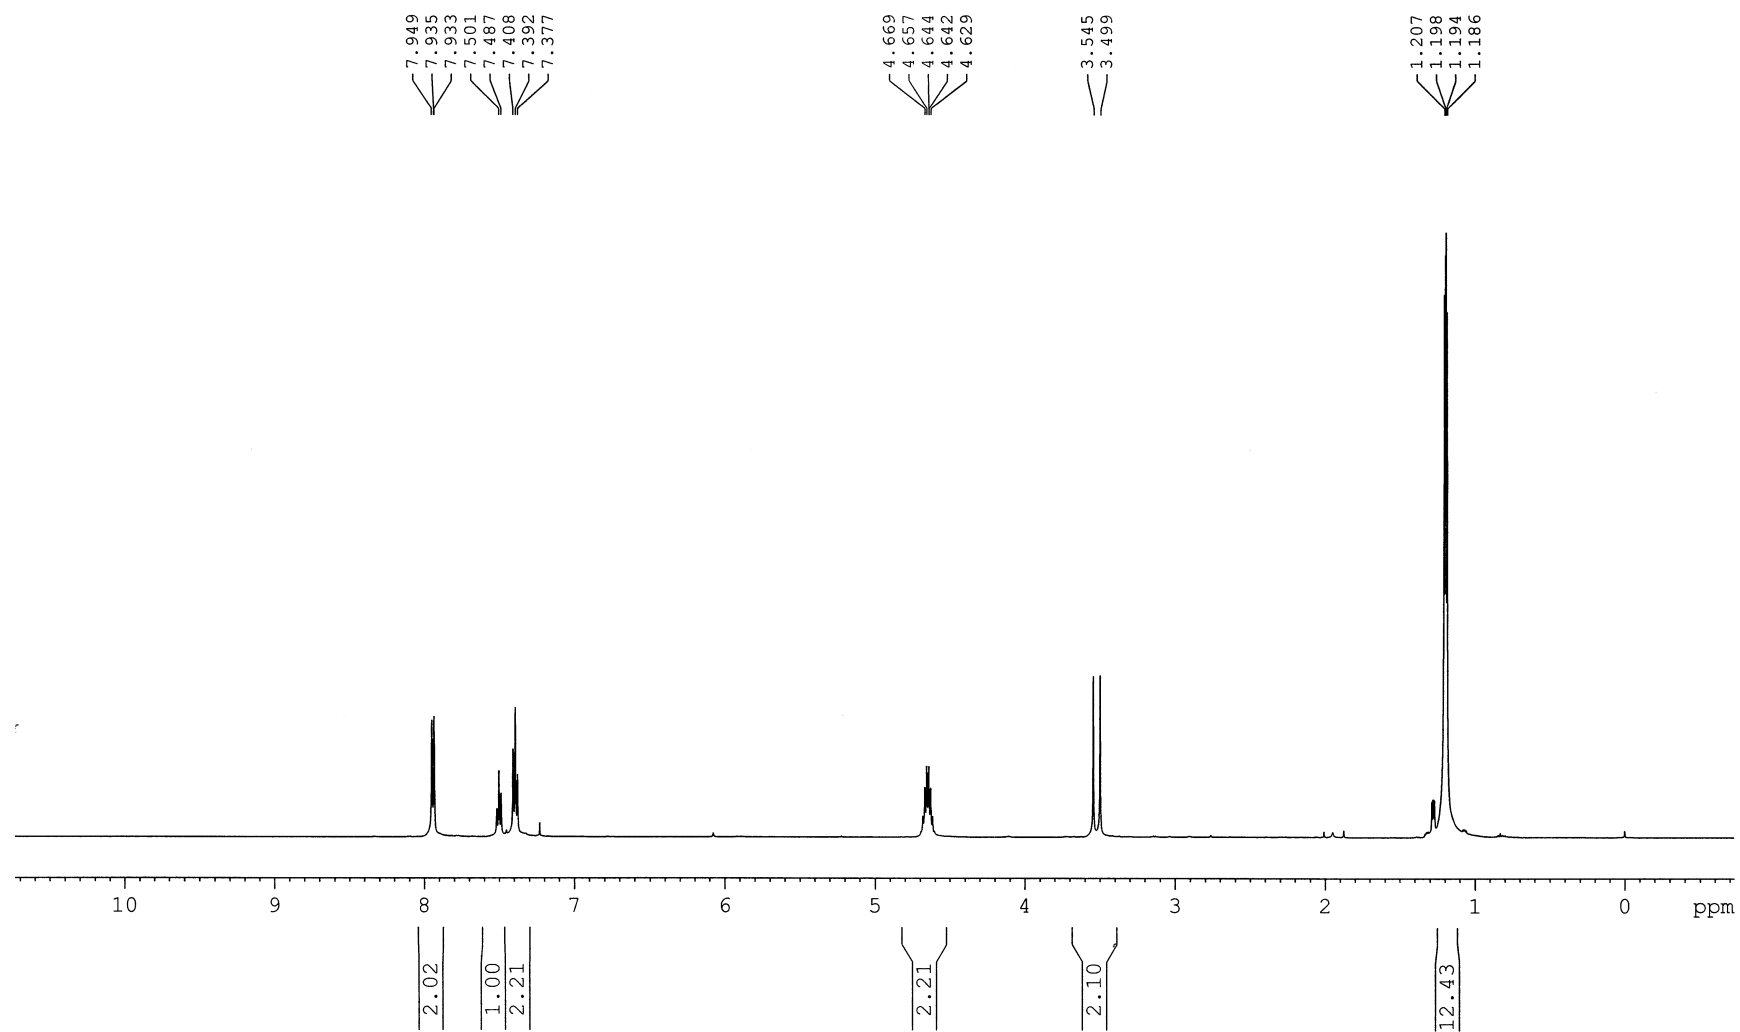

**Figure S39.**  $^1\text{H}$  NMR (500 MHz,  $\text{CDCl}_3$ ) spectra of compound **3u**

DEPT135

YUNNAN UNIVERSITY AVIIIHD500 ZP-185  
Jan16-2017-yufuchao  
C13CPD CDCl3

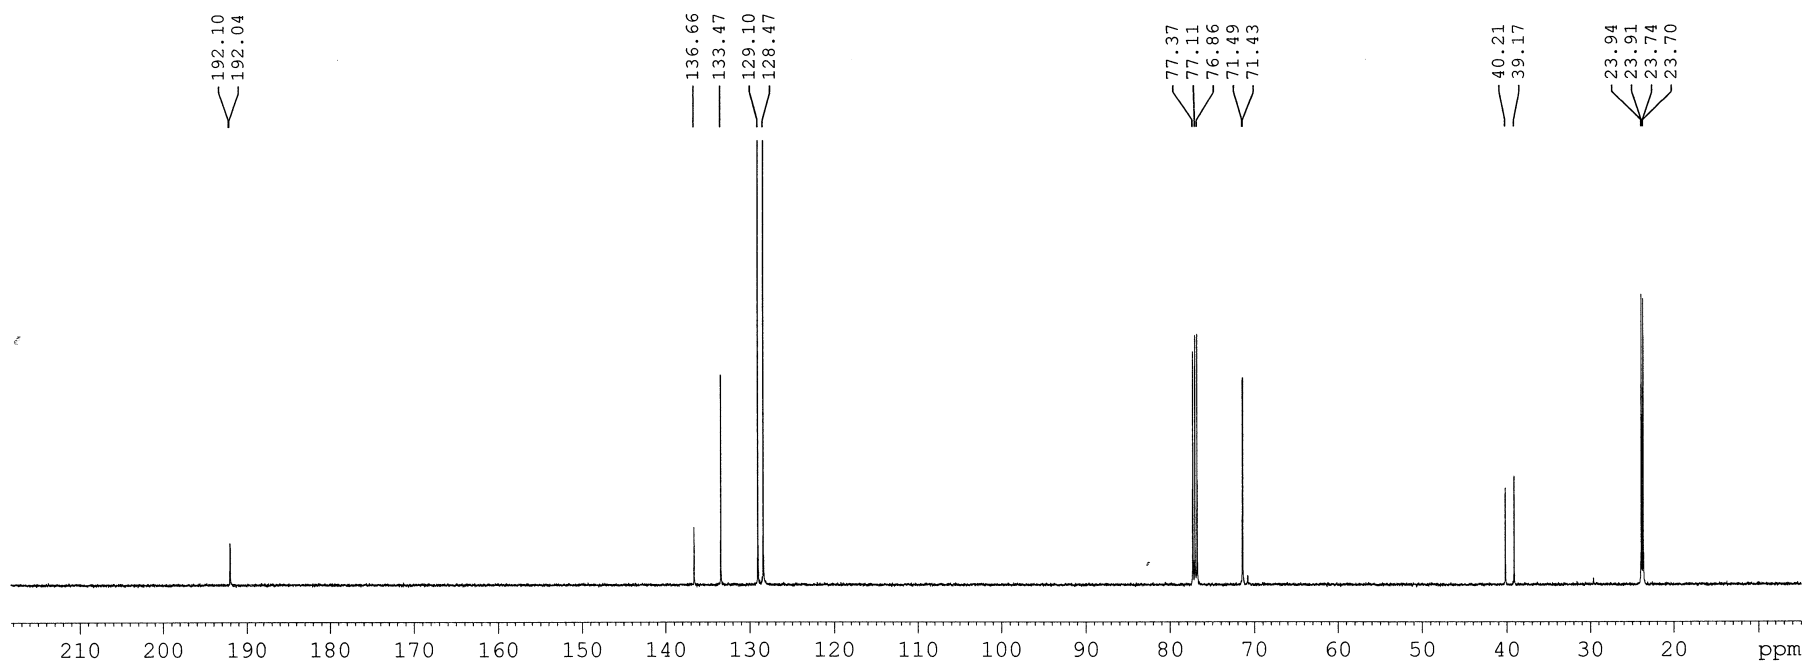

Figure S40.  $^{13}\text{C}$  NMR (125 MHz,  $\text{CDCl}_3$ ) spectra of compound **3u**

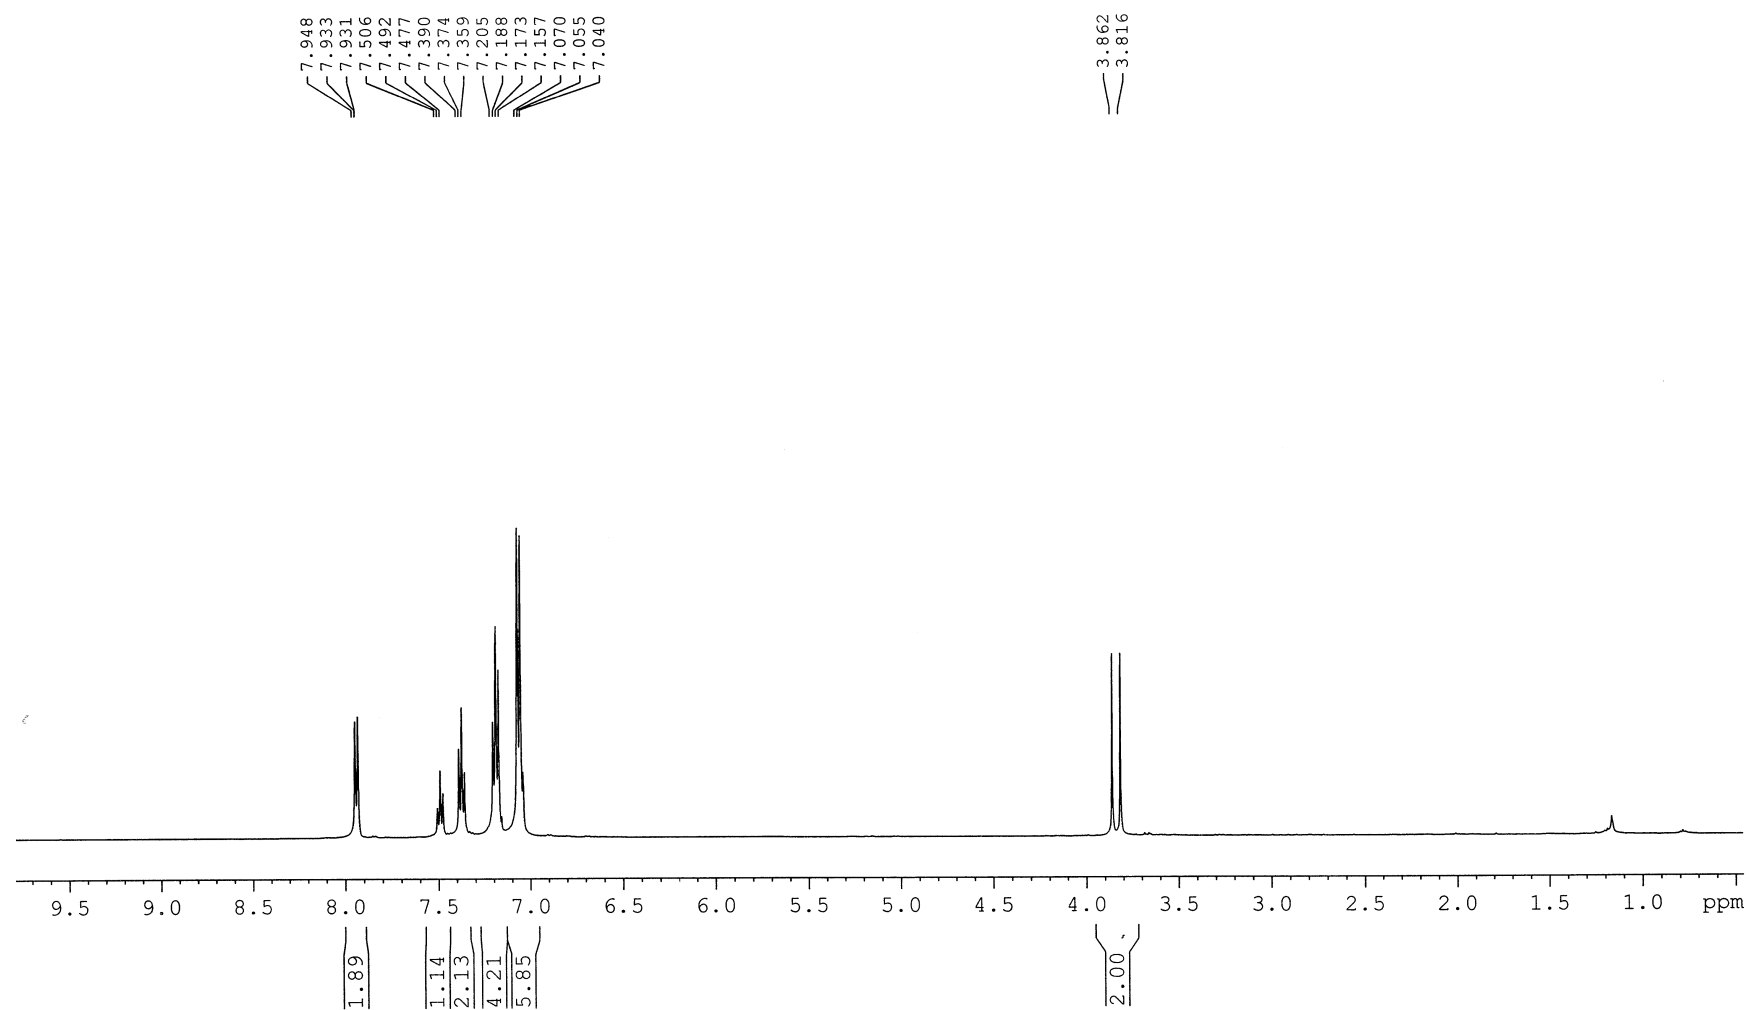

**Figure S41.**  $^1\text{H}$  NMR (500 MHz,  $\text{CDCl}_3$ ) spectra of compound **3v**

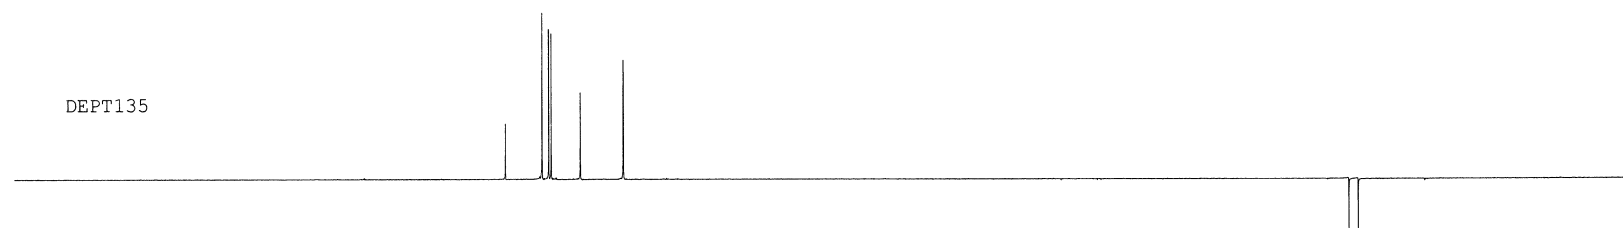

YUNNAN UNIVERSITY AVIIHD500 ZP-184  
Jan16-2017-yufuchao  
C13CPD CDC13

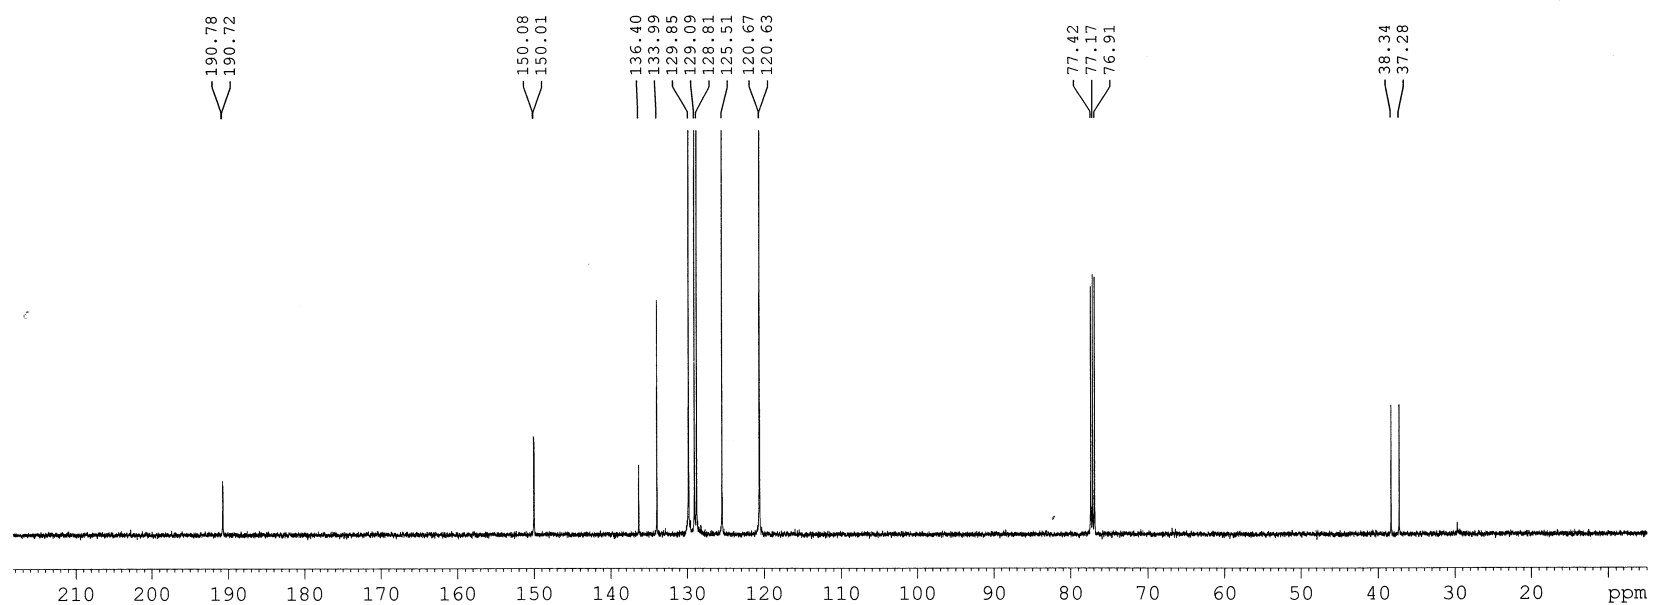

**Figure S42.**  $^{13}\text{C}$  NMR (125 MHz,  $\text{CDCl}_3$ ) spectra of compound **3v**

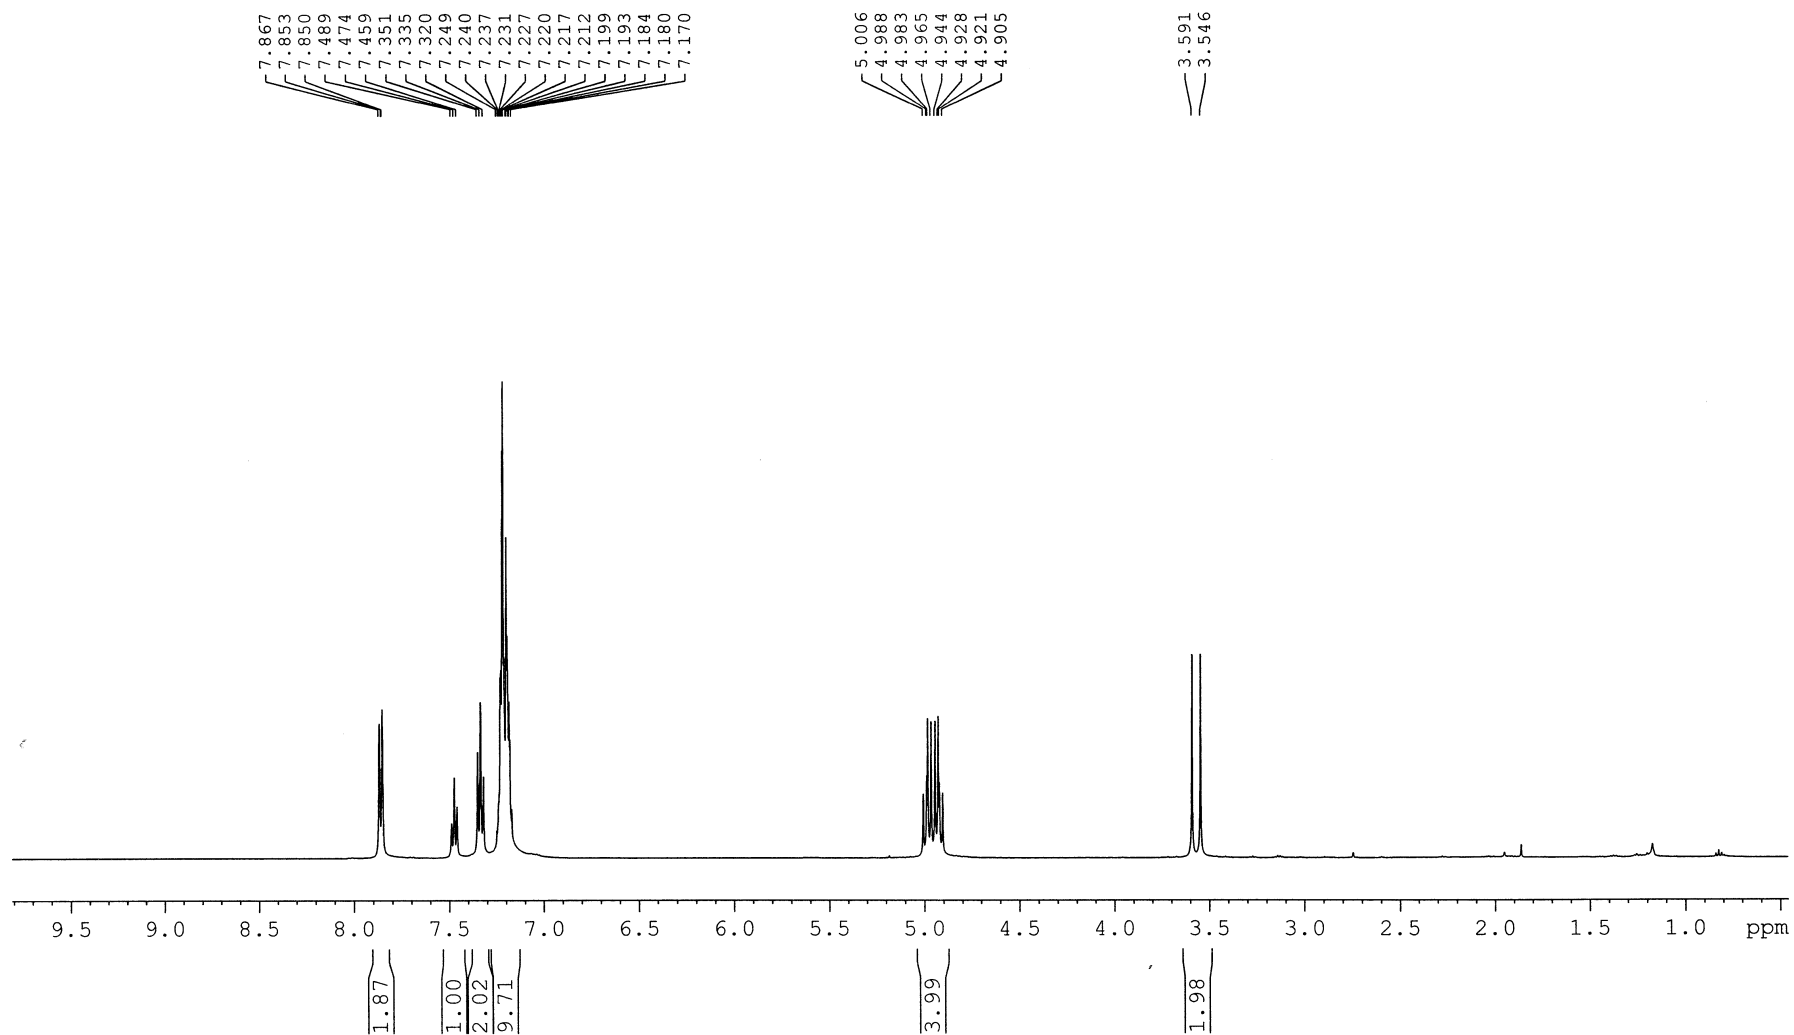

**Figure S43.**  $^1\text{H}$  NMR (500 MHz,  $\text{CDCl}_3$ ) spectra of compound **3w**

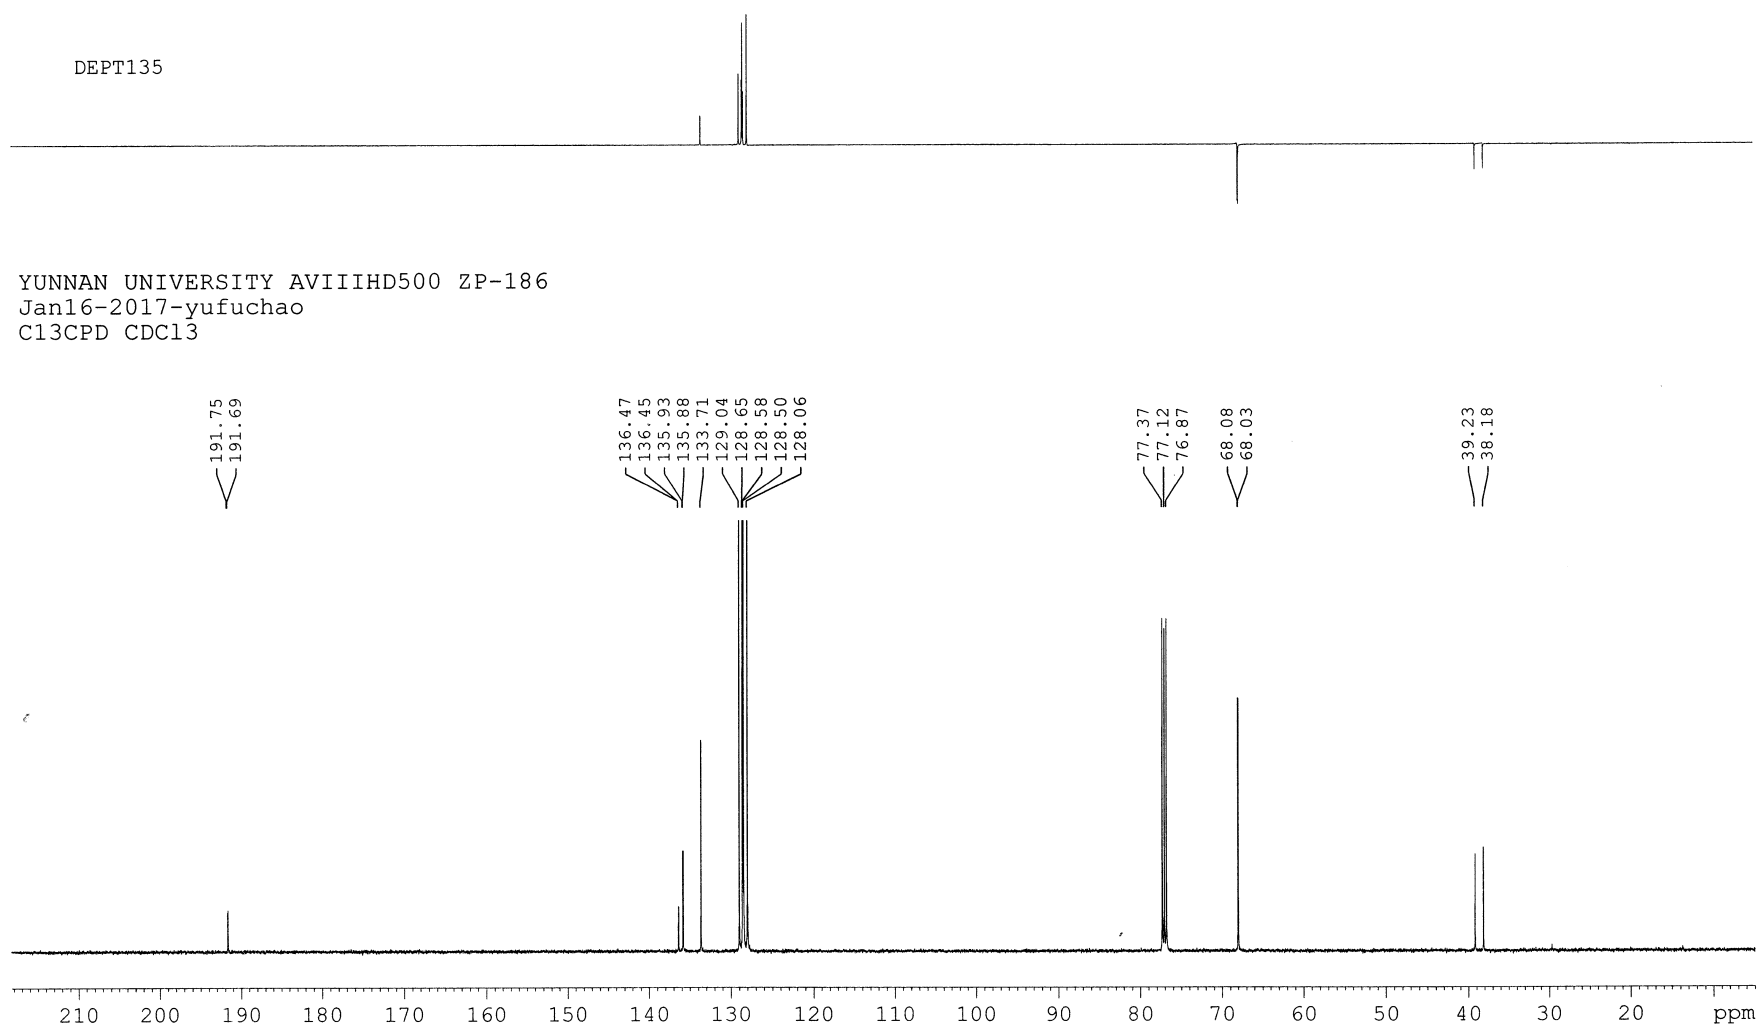

**Figure S44.**  $^{13}\text{C}$  NMR (125 MHz,  $\text{CDCl}_3$ ) spectra of compound **3w**

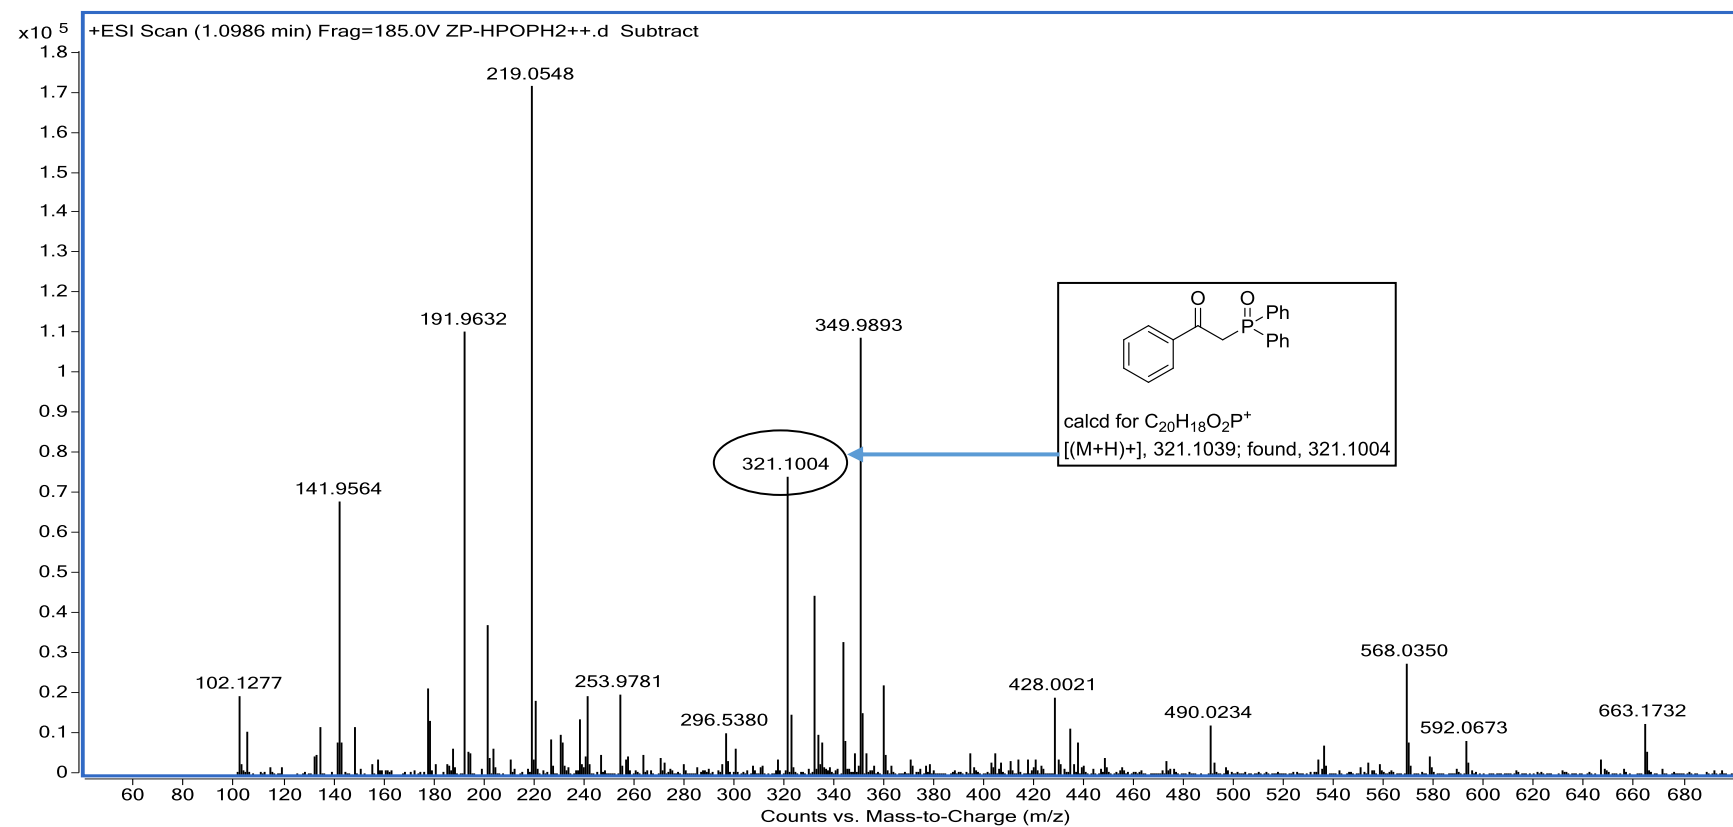

**Figure S45.** HRMS spectra of compound **3x**

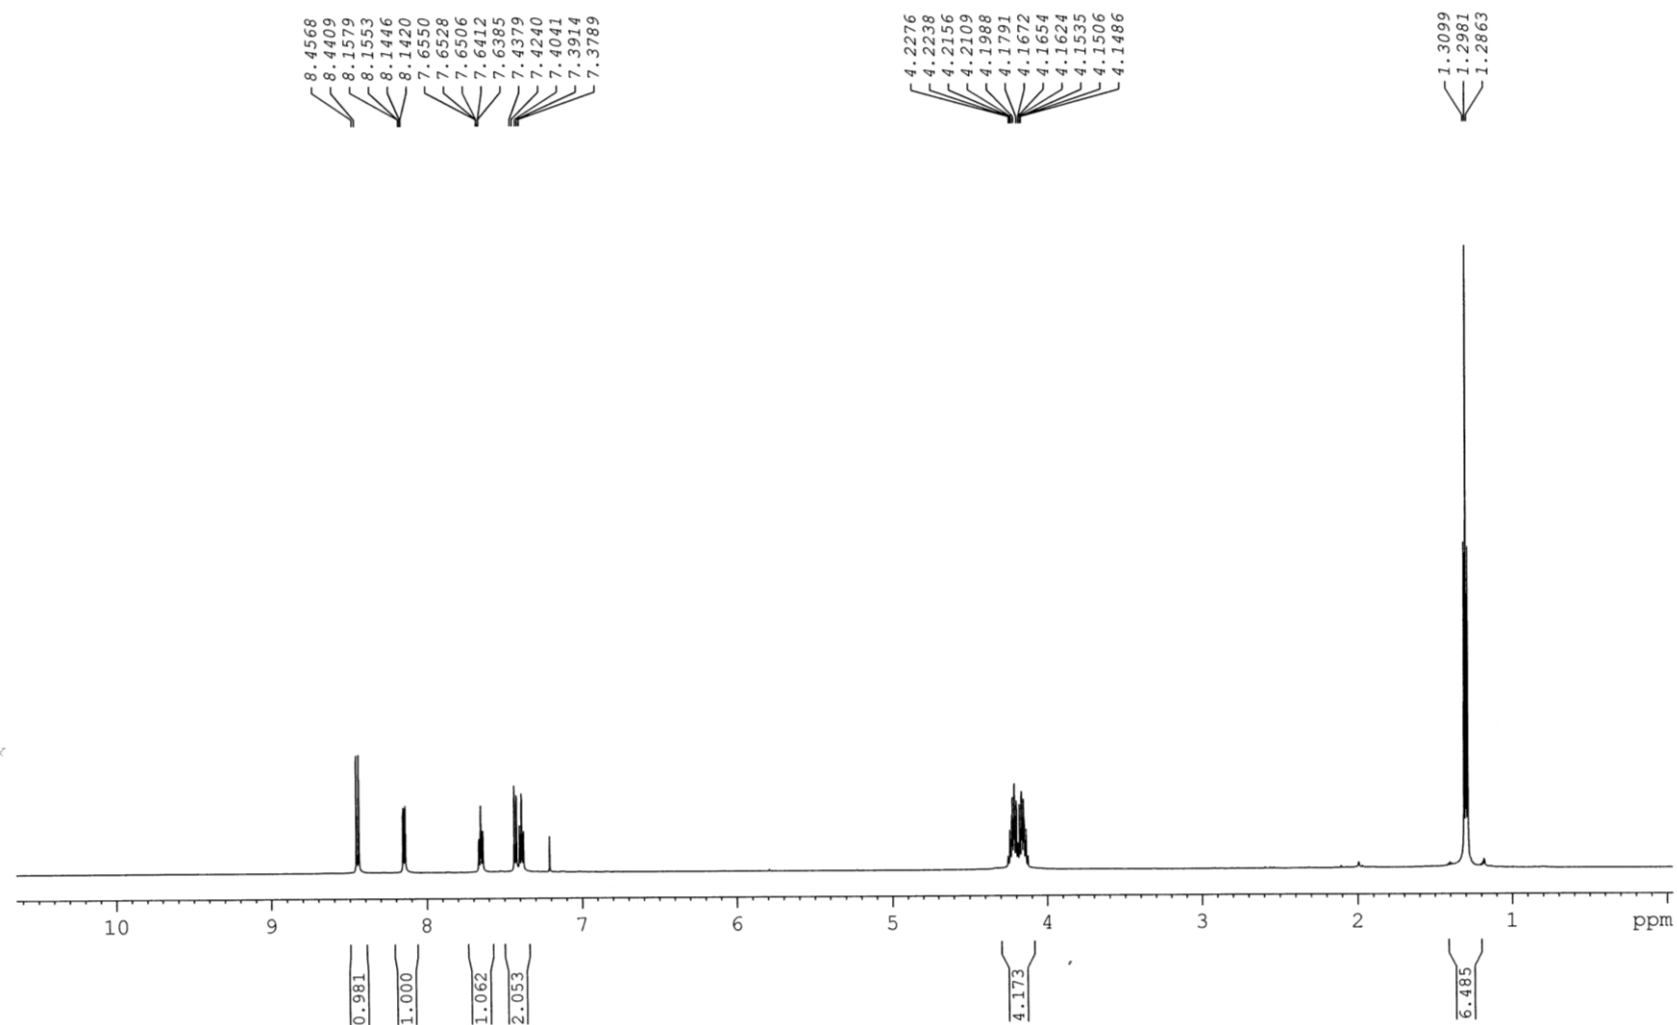

**Figure S46.**  $^1\text{H}$  NMR (600 MHz,  $\text{CDCl}_3$ ) spectra of compound **4a**



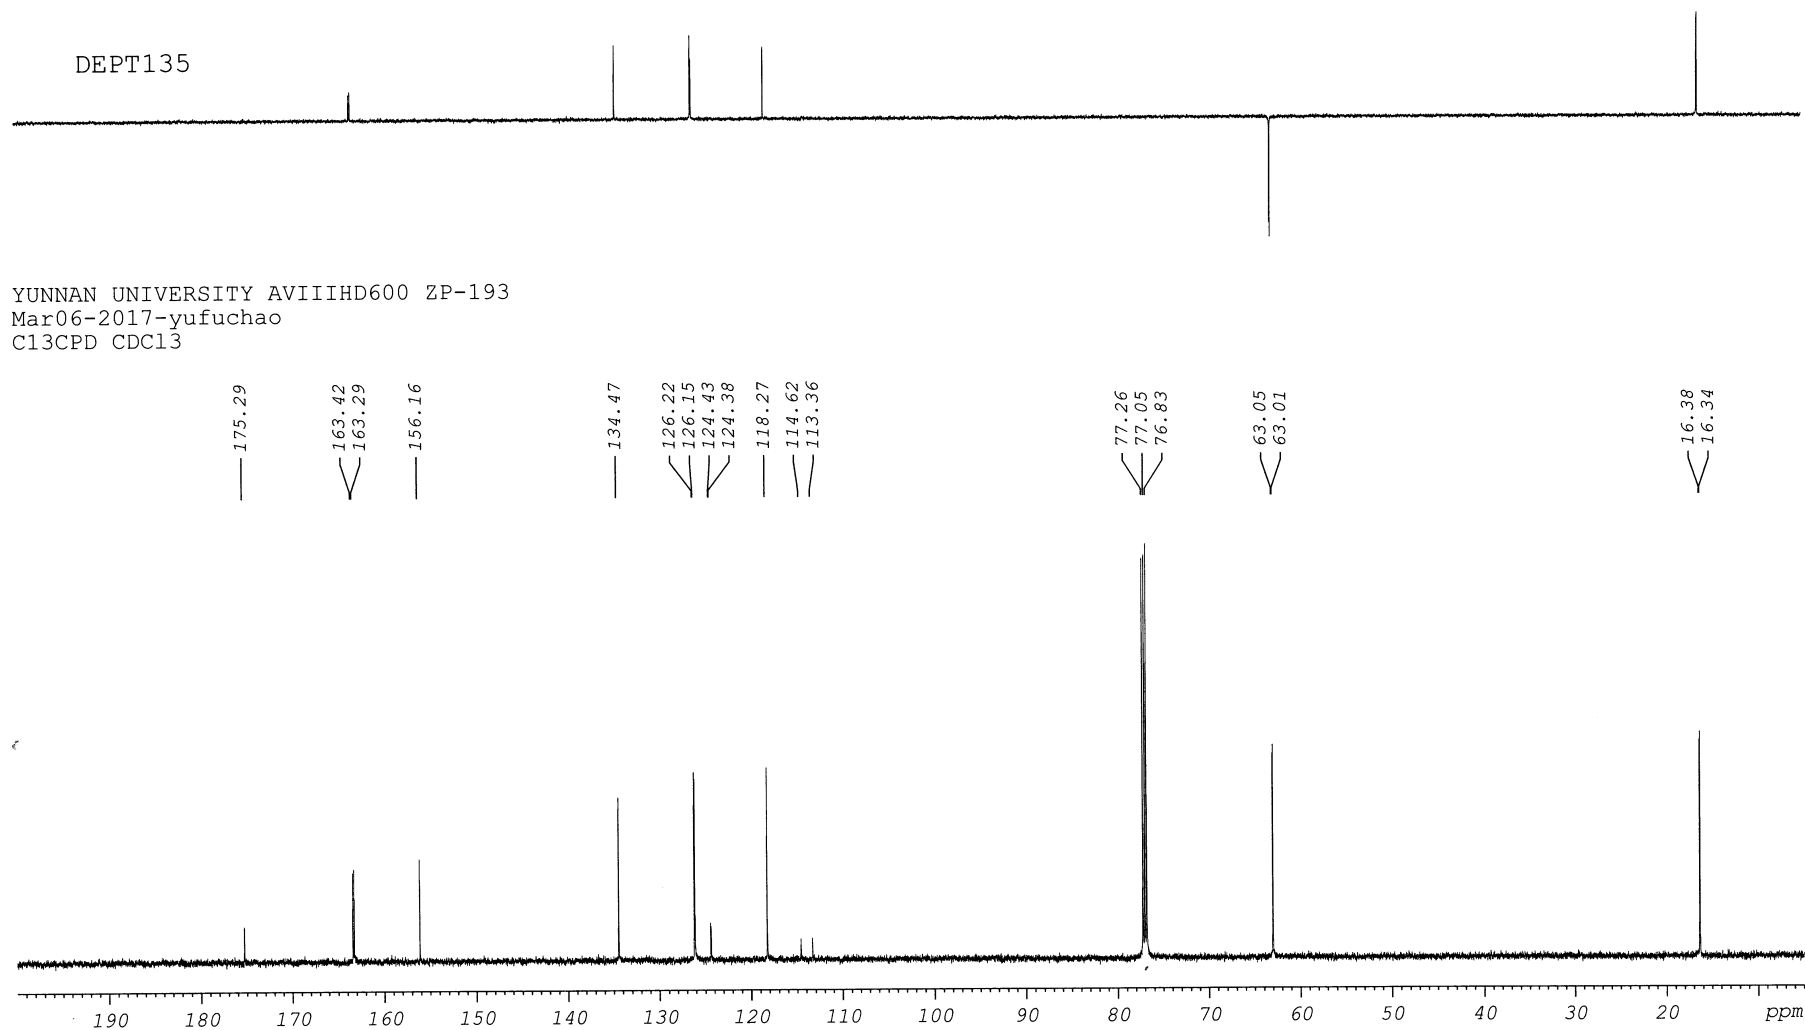

Figure S47.  $^{13}\text{C}$  NMR (150 MHz,  $\text{CDCl}_3$ ) spectra of compound **4a**

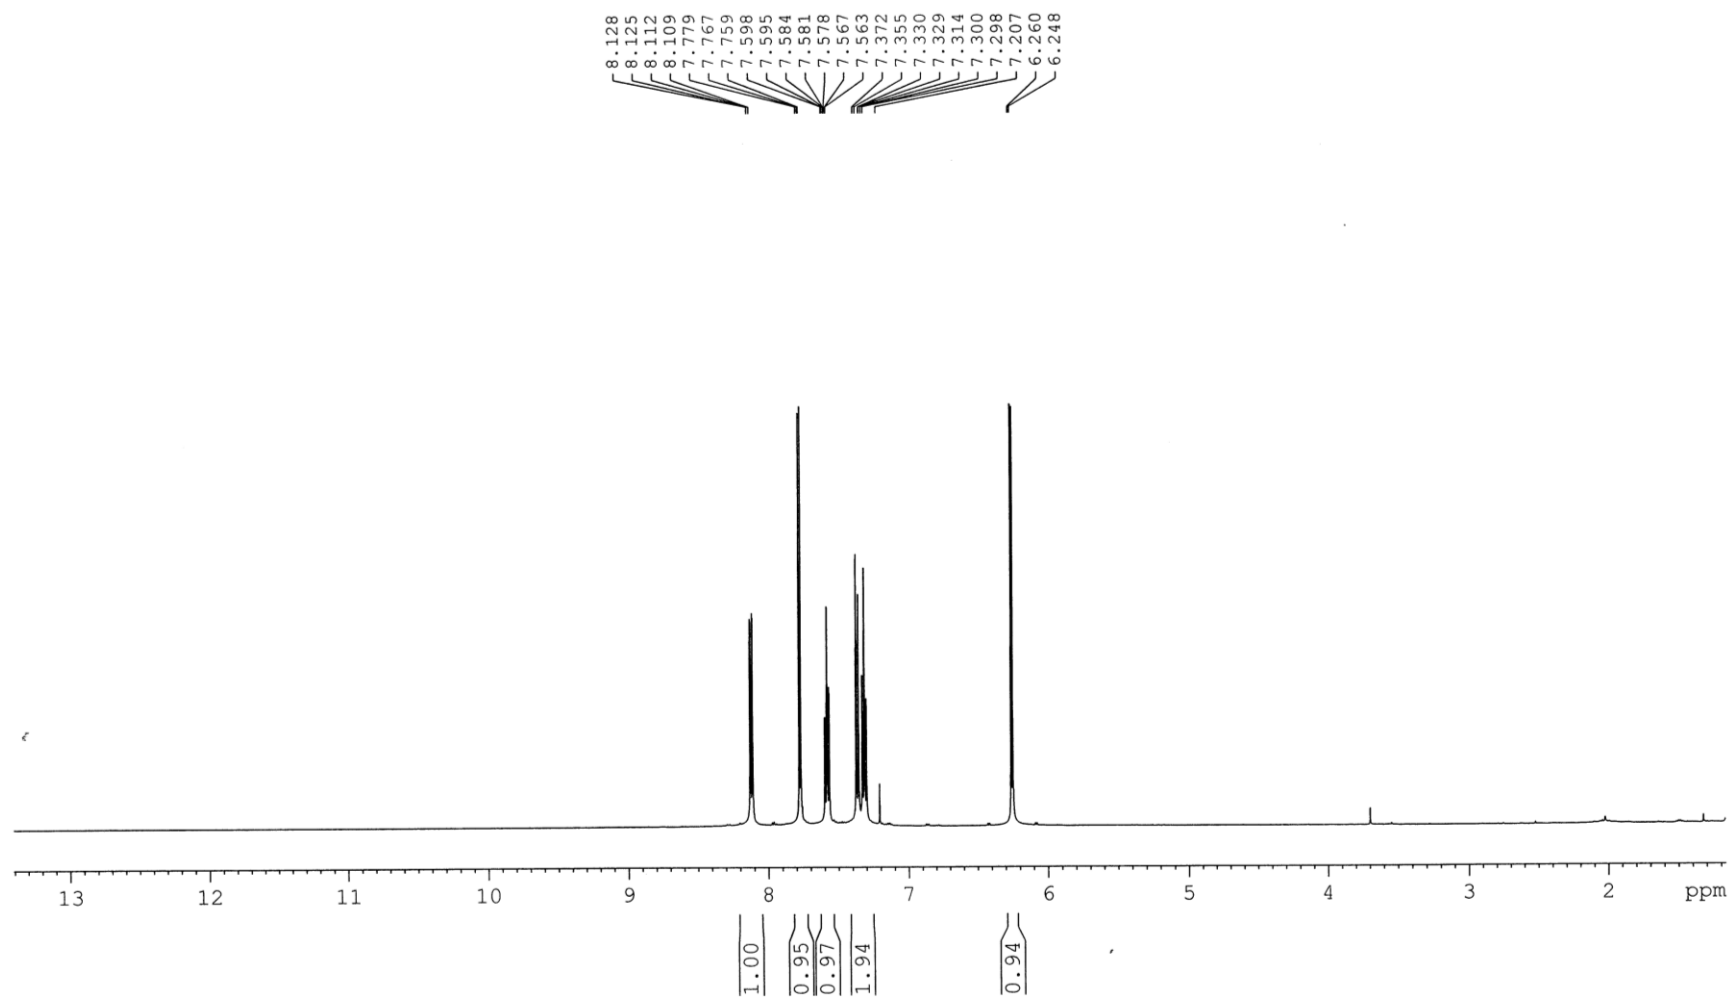

**Figure S48.** <sup>1</sup>H NMR (500 MHz, CDCl<sub>3</sub>) spectra of compound **5**

DEPT135

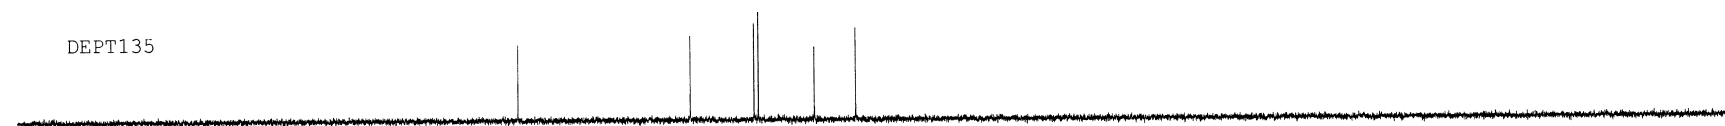

YUNNAN UNIVERSITY AVIIIHD500 ZP-192  
Mar06-2017-yufuchao  
C13CPD CDCl3

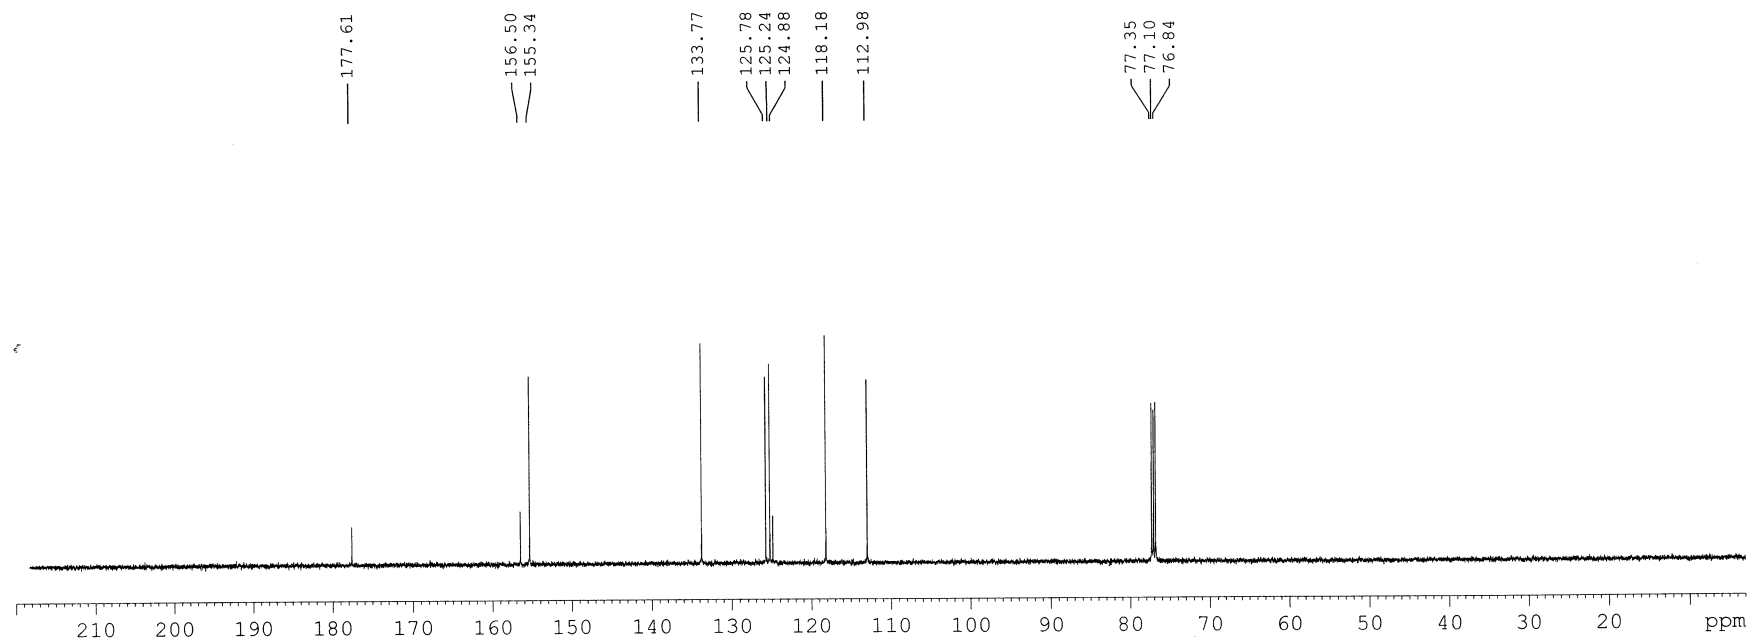

Figure S49. <sup>13</sup>C NMR (125 MHz, CDCl<sub>3</sub>) spectra of compound **5**

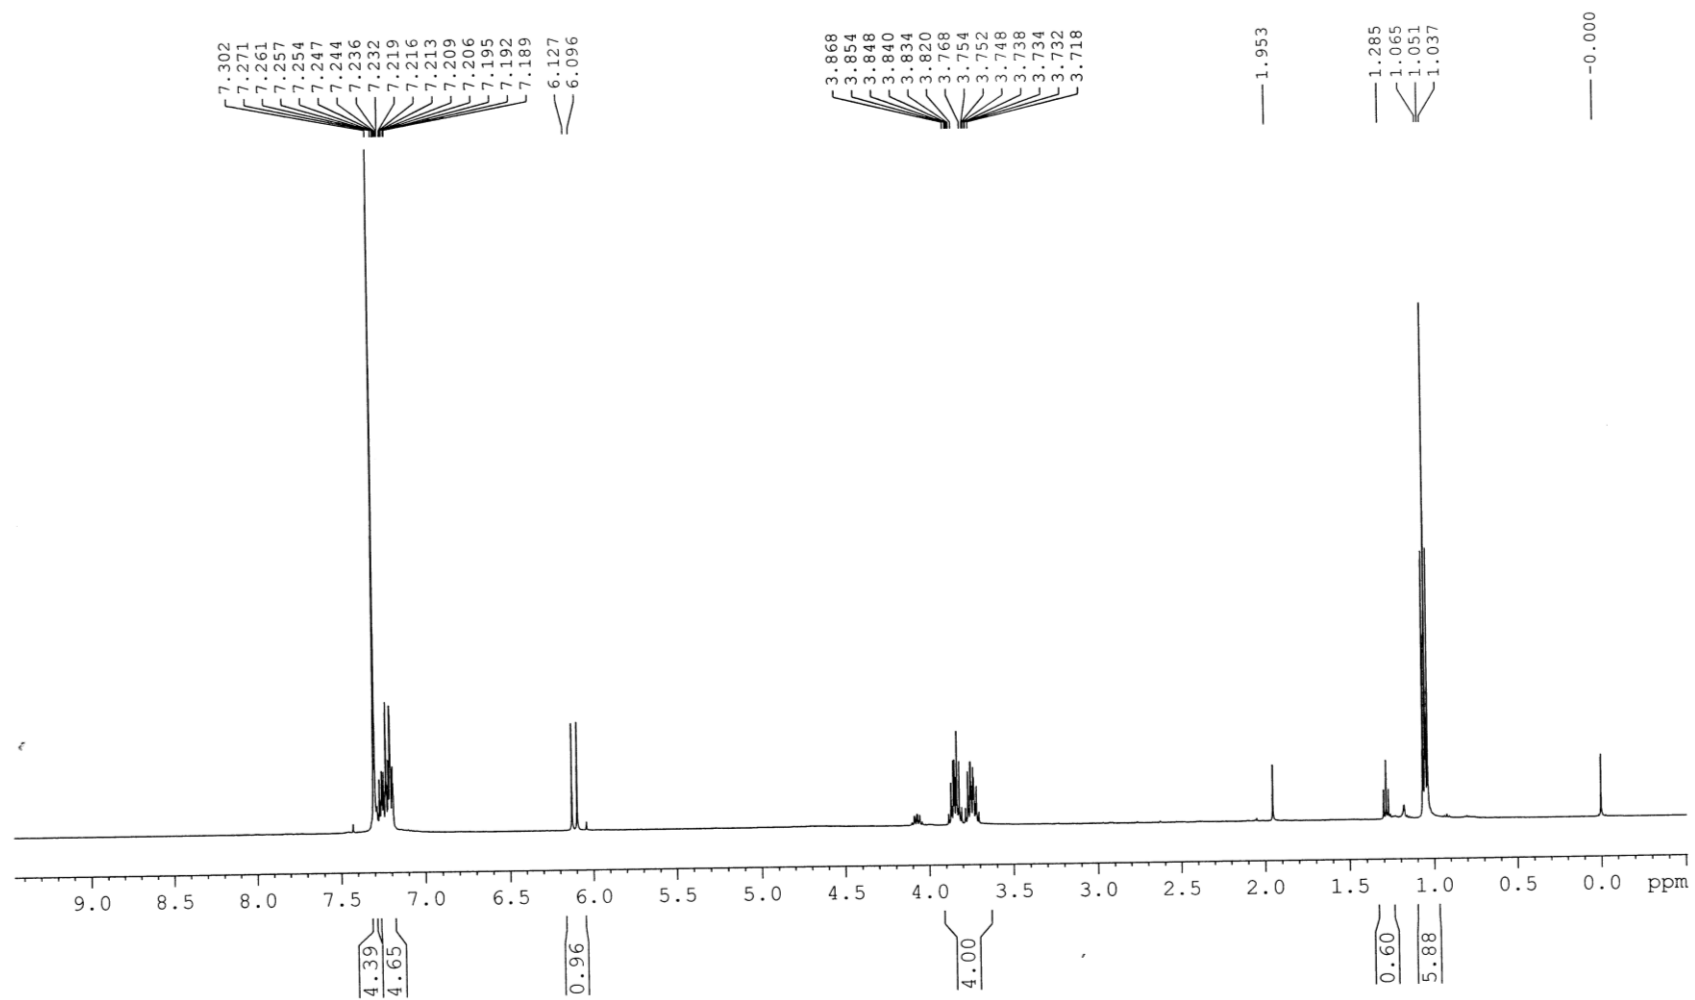

**Figure S50.**  $^1\text{H}$  NMR (500 MHz,  $\text{CDCl}_3$ ) spectra of compound **9**

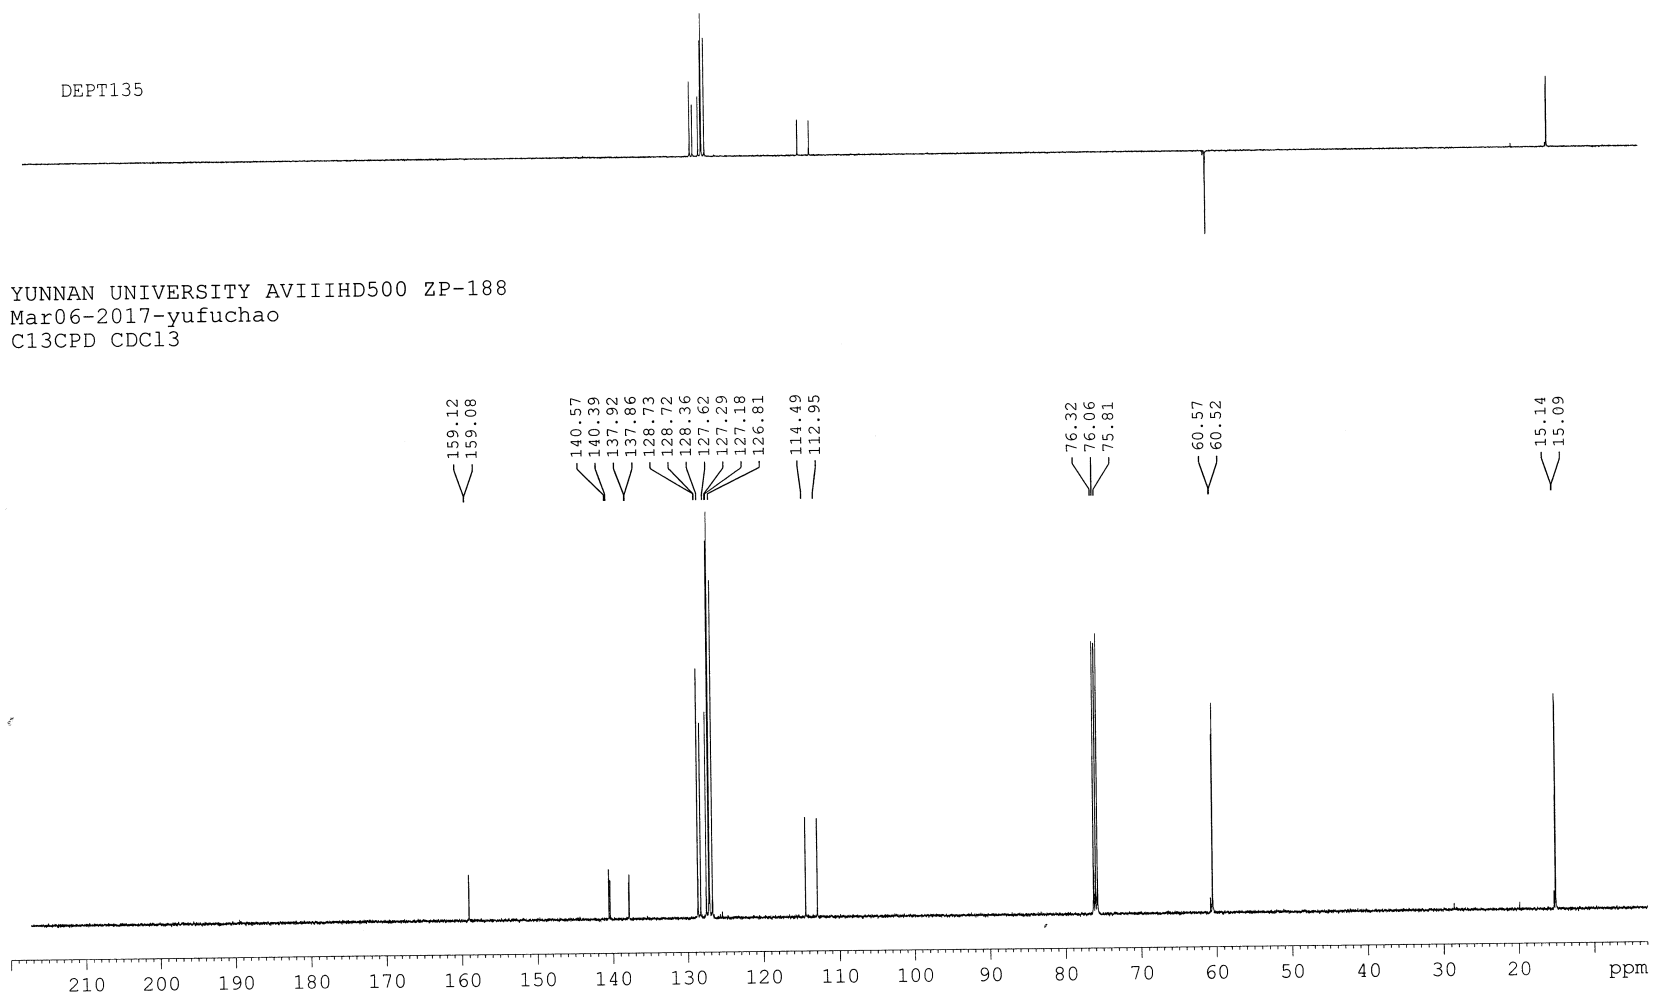

Figure S51.  $^{13}\text{C}$  NMR (125 MHz,  $\text{CDCl}_3$ ) spectra of compound **9**

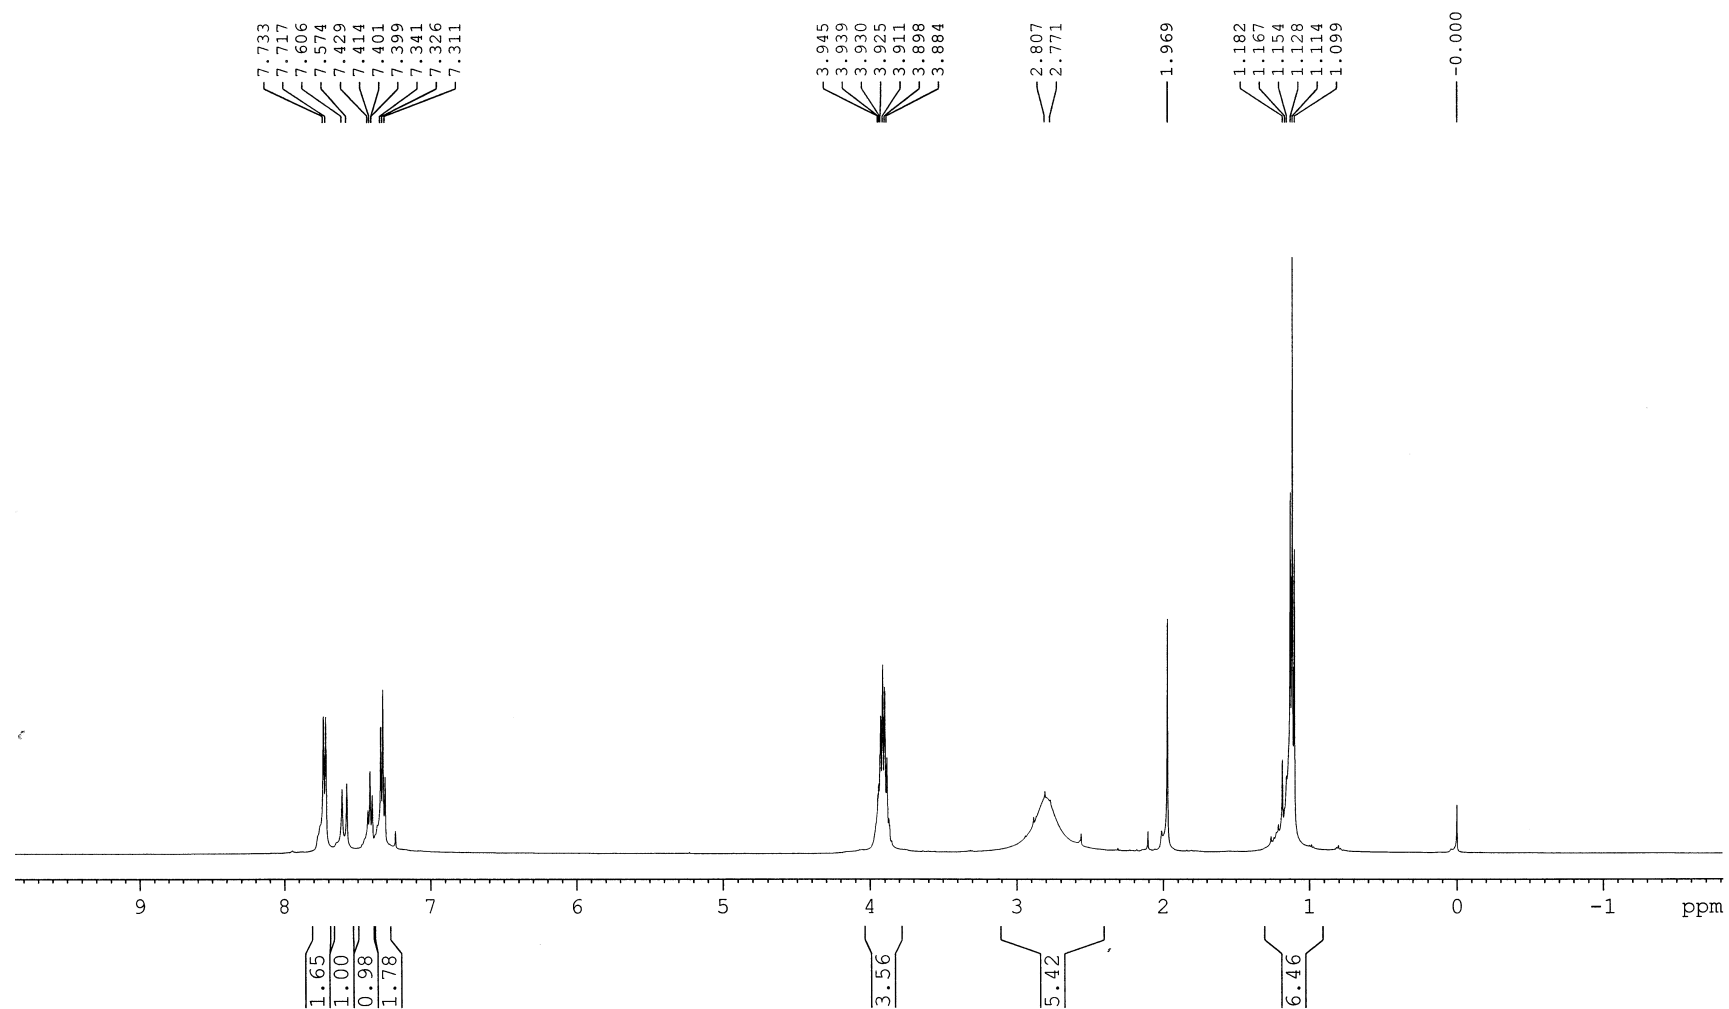

**Figure S52.** <sup>1</sup>H NMR (500 MHz, CDCl<sub>3</sub>) spectra of compound **10a**

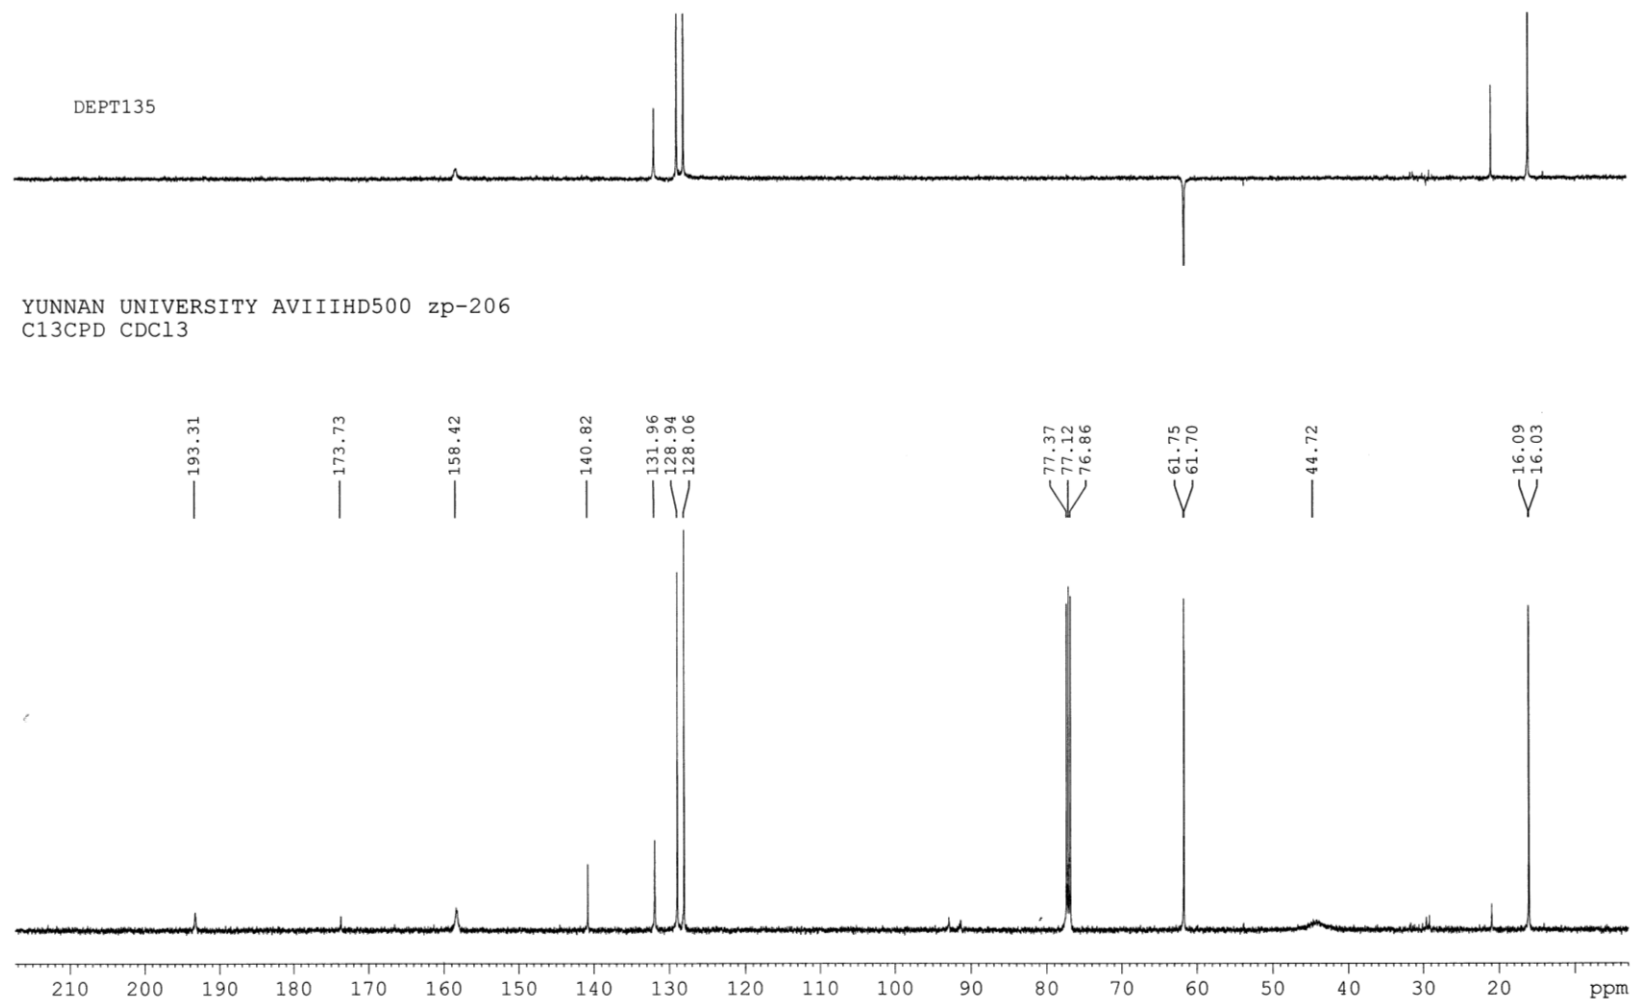

**Figure S53.**  $^{13}\text{C}$  NMR (125 MHz,  $\text{CDCl}_3$ ) spectra of compound **10a**
